# Supplementary material for: Dynamic changes in prokaryotic and eukaryotic communities and networks in a minimally managed cabbage-cultivated field soils
Source: Research Square preprint supplement (doi:10.21203/rs.3.rs-4792790/v1), 2024-08-21
Supplement: Supplementary file 1 [file 780b0f643edfb0c0e47aad27.xlsx]

## Sheet: Read me
Supplementary Data S1. Edge data of the prokaryotic networks in the samples.
Edge data contains name of OTU_1 and OTU_2 (linked pair node SVs), interaction papoameter values, and negative or positive link (cor).
The data in each sample is indicated in the separated Excel sheet.

## Sheet: edge_data_16S_net_Feb
	X2	Y2	OTU_2	OTU_1	weight	X1	Y1	cor
1	0.690079	8.22373	SV_43	SV_11	0.942857	-6.16388	2.07692	+
2	0.690079	8.22373	SV_43	SV_40	0.942857	-3.65867	6.03347	+
3	0.690079	8.22373	SV_43	SV_120	0.942857	7.8016	-1.71732	+
4	0.690079	8.22373	SV_43	SV_104	0.942857	7.11756	-1.71732	+
5	0.690079	8.22373	SV_43	SV_257	0.985611	6.69756	1.4212	+
6	0.690079	8.22373	SV_43	SV_261	-0.927634	6.15652	2.09965	-
7	0.971812	7.73576	SV_30	SV_25	0.927634	5.34	-5.67932	+
8	0.971812	7.73576	SV_30	SV_256	-0.927634	-0.458227	6.61116	-
9	0.971812	7.73576	SV_30	SV_197	0.942857	-8.13601	2.37417	+
10	0.971812	7.73576	SV_30	SV_157	0.92582	5.57145	4.02085	+
11	0.618159	6.71395	SV_76	SV_61	0.985611	4.7988	-6.98589	+
12	0.618159	6.71395	SV_76	SV_366	1	-4.39678	-5.07604	+
13	0.618159	6.71395	SV_76	SV_263	0.955882	0.982456	-8.1428	+
14	0.095056	6.50453	SV_83	SV_26	0.985611	-0.095056	6.50453	+
15	0.095056	6.50453	SV_83	SV_60	0.971008	6.59355	-1.27763	+
16	0.095056	6.50453	SV_83	SV_211	0.927634	-2.54687	-7.33875	+
17	0.095056	6.50453	SV_83	SV_158	0.927634	-0.690079	8.22373	+
18	0.095056	6.50453	SV_83	SV_114	0.985611	6.81679	-0.011583	+
19	-0.945001	7.17293	SV_204	SV_248	0.927634	-0.971812	7.73576	+
20	-0.945001	7.17293	SV_204	SV_230	0.985611	6.34961	2.94566	+
21	3.9151	7.35224	SV_9	SV_218	-0.941124	-8.06968	1.9341	-
22	8.44439	-0.603979	SV_79	SV_139	0.927634	-7.57269	1.39847	+
23	8.44439	-0.603979	SV_79	SV_256	-0.985611	-0.458227	6.61116	-
24	6.47477	-0.603979	SV_180	SV_253	0.970588	-0.189251	8.48193	+
25	5.34	-5.67932	SV_25	SV_98	0.985611	-0.546873	-7.33875	+
26	5.34	-5.67932	SV_25	SV_197	0.927634	-8.13601	2.37417	+
27	5.34	-5.67932	SV_25	SV_248	0.927634	-0.971812	7.73576	+
28	5.34	-5.67932	SV_25	SV_375	0.927634	-7.43356	3.25502	+
29	5.41612	-6.06201	SV_39	SV_273	-0.942857	3.49224	-6.44469	-
30	5.12322	-6.76911	SV_66	SV_76	0.927634	0.618159	6.71395	+
31	5.12322	-6.76911	SV_66	SV_61	0.942857	4.7988	-6.98589	+
32	5.12322	-6.76911	SV_66	SV_366	0.927634	-4.39678	-5.07604	+
33	5.12322	-6.76911	SV_66	SV_263	0.927634	0.982456	-8.1428	+
34	4.7988	-6.98589	SV_61	SV_366	0.985611	-4.39678	-5.07604	+
35	4.7988	-6.98589	SV_61	SV_263	0.985611	0.982456	-8.1428	+
36	4.41612	-7.06201	SV_53	SV_364	0.970588	2.18304	6.35224	+
37	-7.45706	0.198615	SV_37	SV_83	0.942857	0.095056	6.50453	+
38	-7.45706	0.198615	SV_37	SV_221	0.942857	-8.40812	-0.492368	+
39	-7.45706	0.198615	SV_37	SV_114	0.985611	6.81679	-0.011583	+
40	-7.13881	3.29944	SV_3	SV_38	0.942857	-6.45863	3.0325	+
41	-7.13881	3.29944	SV_3	SV_12	1	0.371662	8.42837	+
42	-7.13881	3.29944	SV_3	SV_20	0.942857	0.814576	8.08006	+
43	-7.13881	3.29944	SV_3	SV_36	0.985611	-6.1416	2.22471	+
44	-7.13881	3.29944	SV_3	SV_48	0.942857	-6.35698	1.67595	+
45	-6.45863	3.0325	SV_38	SV_12	0.942857	0.371662	8.42837	+
46	-6.45863	3.0325	SV_38	SV_36	0.927634	-6.1416	2.22471	+
47	-6.45863	3.0325	SV_38	SV_32	0.942857	-2.11982	6.53347	+
48	-6.45863	3.0325	SV_38	SV_48	1	-6.35698	1.67595	+
49	-6.45863	3.0325	SV_38	SV_243	0.927634	-0.989821	7.35769	+
50	-6.45863	3.0325	SV_38	SV_221	0.942857	-8.40812	-0.492368	+
51	-6.27278	2.79944	SV_21	SV_143	-0.942857	5.34	-6.44469	-
52	-6.27278	2.79944	SV_21	SV_9	0.941124	3.9151	7.35224	+
53	-6.27278	2.79944	SV_21	SV_218	-1	-8.06968	1.9341	-
54	-6.1416	2.22471	SV_36	SV_32	0.927634	-2.11982	6.53347	+
55	-6.1416	2.22471	SV_36	SV_48	0.927634	-6.35698	1.67595	+
56	-6.1416	2.22471	SV_36	SV_103	0.924062	-0.998867	7.54758	+
57	-6.16388	2.07692	SV_11	SV_107	0.942857	8.3256	-1.27763	+
58	-6.16388	2.07692	SV_11	SV_204	0.927634	-0.945001	7.17293	+
59	-6.16388	2.07692	SV_11	SV_257	0.927634	6.69756	1.4212	+
60	-6.16388	2.07692	SV_11	SV_267	0.927634	-0.814576	8.08006	+
61	-6.16388	2.07692	SV_11	SV_230	0.942857	6.34961	2.94566	+
62	-6.84405	1.34387	SV_100	SV_198	-0.942857	-3.65867	7.65151	-
63	-8.00483	1.79944	SV_71	SV_307	0.942857	-8.40812	-1.1104	+
64	-2.11982	7.15151	SV_28	SV_32	0.942857	-2.11982	6.53347	+
65	-2.11982	7.15151	SV_28	SV_89	0.942857	-6.27278	1.79944	+
66	-2.11982	7.15151	SV_28	SV_160	0.942857	-7.45706	-1.80138	+
67	-2.11982	7.15151	SV_28	SV_243	0.985611	-0.989821	7.35769	+
68	-2.11982	7.15151	SV_28	SV_103	0.941124	-0.998867	7.54758	+
69	-2.11982	6.53347	SV_32	SV_48	0.942857	-6.35698	1.67595	+
70	-2.11982	6.53347	SV_32	SV_22	0.942857	-6.57549	1.4732	+
71	-2.11982	6.53347	SV_32	SV_243	0.985611	-0.989821	7.35769	+
72	-2.11982	6.53347	SV_32	SV_103	0.941124	-0.998867	7.54758	+
73	-2.11982	6.53347	SV_32	SV_86	0.942857	-3.53076	-6.57604	+
74	-3.65867	7.65151	SV_198	SV_209	-0.942857	4.03343	-5.13813	-
75	-3.65867	7.65151	SV_198	SV_115	0.927634	-7.28785	3.28827	+
76	-4.39678	-5.07604	SV_366	SV_263	0.955882	0.982456	-8.1428	+
77	-6.98976	3.28827	SV_1	SV_63	0.927634	-6.1416	2.37417	+
78	0.989821	7.35769	SV_49	SV_162	0.942857	-6.86928	-1.6104	+
79	0.989821	7.35769	SV_49	SV_78	0.985611	-7.28785	1.31061	+
80	0.989821	7.35769	SV_49	SV_307	0.942857	-8.40812	-1.1104	+
81	0.989821	7.35769	SV_49	SV_211	0.927634	-2.54687	-7.33875	+
82	0.989821	7.35769	SV_49	SV_158	0.927634	-0.690079	8.22373	+
83	-0.095056	6.50453	SV_26	SV_162	0.927634	-6.86928	-1.6104	+
84	-0.095056	6.50453	SV_26	SV_307	0.927634	-8.40812	-1.1104	+
85	-0.095056	6.50453	SV_26	SV_60	0.940403	6.59355	-1.27763	+
86	-0.095056	6.50453	SV_26	SV_211	0.970588	-2.54687	-7.33875	+
87	-0.095056	6.50453	SV_26	SV_114	0.955882	6.81679	-0.011583	+
88	-8.04485	-1.6104	SV_135	SV_198	-0.927634	-3.65867	7.65151	-
89	-8.04485	-1.6104	SV_135	SV_80	-0.924062	-7.70213	3.12568	-
90	-6.57549	1.4732	SV_22	SV_27	0.942857	-7.13881	1.29944	+
91	-6.57549	1.4732	SV_22	SV_160	0.942857	-7.45706	-1.80138	+
92	-6.57549	1.4732	SV_22	SV_243	0.927634	-0.989821	7.35769	+
93	-6.57549	1.4732	SV_22	SV_86	1	-3.53076	-6.57604	+
94	-7.13881	1.29944	SV_27	SV_156	0.942857	-4.02194	7.15151	+
95	-7.13881	1.29944	SV_27	SV_86	0.942857	-3.53076	-6.57604	+
96	-4.02194	7.15151	SV_156	SV_88	0.941124	-7.57269	3.20041	+
97	0.814576	8.08006	SV_20	SV_98	0.942857	-0.546873	-7.33875	+
98	0.814576	8.08006	SV_20	SV_92	0.927634	-0.75575	6.84514	+
99	0.814576	8.08006	SV_20	SV_452	0.927634	0.619184	-7.02476	+
100	-0.458227	6.61116	SV_256	SV_45	-0.924062	-7.92064	1.67595	-
101	-0.458227	6.61116	SV_256	SV_80	-0.924062	-7.70213	3.12568	-
102	7.8016	-1.71732	SV_120	SV_104	1	7.11756	-1.71732	+
103	7.8016	-1.71732	SV_120	SV_257	0.985611	6.69756	1.4212	+
104	7.8016	-1.71732	SV_120	SV_261	-0.985611	6.15652	2.09965	-
105	7.8016	-1.71732	SV_120	SV_253	0.927634	-0.189251	8.48193	+
106	5.34	-6.44469	SV_143	SV_330	-0.942857	-0.618159	6.71395	-
107	5.34	-6.44469	SV_143	SV_218	0.942857	-8.06968	1.9341	+
108	-6.1416	2.37417	SV_63	SV_128	0.942857	7.56533	1.4212	+
109	-8.11373	2.07692	SV_54	SV_157	-0.939336	5.57145	4.02085	-
110	-5.58742	5.00307	SV_41	SV_49	0.942857	0.989821	7.35769	+
111	-5.58742	5.00307	SV_41	SV_158	0.985611	-0.690079	8.22373	+
112	-5.58742	5.00307	SV_41	SV_552	0.927634	-8.04485	0.00763246	+
113	-3.07088	7.84249	SV_113	SV_66	0.942857	5.12322	-6.76911	+
114	-6.27278	1.79944	SV_89	SV_243	0.927634	-0.989821	7.35769	+
115	0	8.5	SV_4	SV_31	0.942857	5.12322	-5.3549	+
116	0	8.5	SV_4	SV_52	1	2.5213	-7.02476	+
117	0	8.5	SV_4	SV_30	0.942857	0.971812	7.73576	+
118	0	8.5	SV_4	SV_25	0.985611	5.34	-5.67932	+
119	0	8.5	SV_4	SV_98	0.942857	-0.546873	-7.33875	+
120	0	8.5	SV_4	SV_157	0.92582	5.57145	4.02085	+
121	0	8.5	SV_4	SV_375	0.942857	-7.43356	3.25502	+
122	4.41612	-5.06201	SV_13	SV_16	0.942857	-6.84405	3.25502	+
123	4.41612	-5.06201	SV_13	SV_54	-0.985611	-8.11373	2.07692	-
124	4.41612	-5.06201	SV_13	SV_204	0.927634	-0.945001	7.17293	+
125	4.41612	-5.06201	SV_13	SV_267	0.927634	-0.814576	8.08006	+
126	4.41612	-5.06201	SV_13	SV_157	0.92582	5.57145	4.02085	+
127	4.7988	-5.13813	SV_46	SV_287	0.927634	-1.54687	-8.33875	+
128	3.49224	-6.44469	SV_273	SV_150	-0.971008	-7.81898	3.0325	-
129	3.41612	-6.06201	SV_47	SV_156	0.942857	-4.02194	7.15151	+
130	3.41612	-6.06201	SV_47	SV_88	0.941124	-7.57269	3.20041	+
131	3.49224	-5.67932	SV_237	SV_221	0.942857	-8.40812	-0.492368	+
132	-6.50601	-0.492368	SV_129	SV_503	0.941124	-5.26281	-6.57604	+
133	-6.86928	-1.6104	SV_162	SV_78	0.927634	-7.28785	1.31061	+
134	-6.86928	-1.6104	SV_162	SV_71	0.942857	-8.00483	1.79944	+
135	-6.86928	-1.6104	SV_162	SV_307	1	-8.40812	-1.1104	+
136	-6.86928	-1.6104	SV_162	SV_211	0.985611	-2.54687	-7.33875	+
137	-8.40812	-1.1104	SV_307	SV_211	0.985611	-2.54687	-7.33875	+
138	-6.16388	2.52196	SV_6	SV_28	0.942857	-2.11982	7.15151	+
139	-6.16388	2.52196	SV_6	SV_22	0.942857	-6.57549	1.4732	+
140	-6.16388	2.52196	SV_6	SV_160	1	-7.45706	-1.80138	+
141	-6.16388	2.52196	SV_6	SV_243	0.927634	-0.989821	7.35769	+
142	-6.16388	2.52196	SV_6	SV_86	0.942857	-3.53076	-6.57604	+
143	-2.4831	6.03347	SV_18	SV_44	0.942857	-6.48721	-3.76378	+
144	-0.989821	7.35769	SV_243	SV_103	0.954864	-0.998867	7.54758	+
145	-0.989821	7.35769	SV_243	SV_86	0.927634	-3.53076	-6.57604	+
146	8.3256	-1.27763	SV_107	SV_120	0.942857	7.8016	-1.71732	+
147	8.3256	-1.27763	SV_107	SV_104	0.942857	7.11756	-1.71732	+
148	8.3256	-1.27763	SV_107	SV_204	0.927634	-0.945001	7.17293	+
149	8.3256	-1.27763	SV_107	SV_257	0.927634	6.69756	1.4212	+
150	8.3256	-1.27763	SV_107	SV_267	0.927634	-0.814576	8.08006	+
151	4.03343	-6.98589	SV_345	SV_156	0.942857	-4.02194	7.15151	+
152	4.03343	-6.98589	SV_345	SV_88	0.941124	-7.57269	3.20041	+
153	-8.06968	2.66478	SV_155	SV_249	-0.924062	3.70901	-5.3549	-
154	2.5213	-7.02476	SV_52	SV_30	0.942857	0.971812	7.73576	+
155	2.5213	-7.02476	SV_52	SV_25	0.985611	5.34	-5.67932	+
156	2.5213	-7.02476	SV_52	SV_98	0.942857	-0.546873	-7.33875	+
157	2.5213	-7.02476	SV_52	SV_157	0.92582	5.57145	4.02085	+
158	2.5213	-7.02476	SV_52	SV_375	0.942857	-7.43356	3.25502	+
159	-7.43356	1.34387	SV_50	SV_139	0.985611	-7.57269	1.39847	+
160	-6.70492	1.39847	SV_77	SV_280	-0.927634	2.15803	-8.1428	-
161	7.13145	3.32217	SV_8	SV_38	0.942857	-6.45863	3.0325	+
162	7.13145	3.32217	SV_8	SV_37	0.942857	-7.45706	0.198615	+
163	7.13145	3.32217	SV_8	SV_48	0.942857	-6.35698	1.67595	+
164	7.13145	3.32217	SV_8	SV_85	0.942857	5.57145	6.02085	+
165	7.13145	3.32217	SV_8	SV_237	0.942857	3.49224	-5.67932	+
166	7.13145	3.32217	SV_8	SV_221	1	-8.40812	-0.492368	+
167	7.13145	3.32217	SV_8	SV_114	0.927634	6.81679	-0.011583	+
168	7.45958	0.222373	SV_2	SV_129	0.942857	-6.50601	-0.492368	+
169	6.49917	-3.7431	SV_584	SV_180	0.941176	6.47477	-0.603979	+
170	6.49917	-3.7431	SV_584	SV_253	0.970588	-0.189251	8.48193	+
171	4.03343	-5.13813	SV_209	SV_115	-0.985611	-7.28785	3.28827	-
172	-8.40812	-0.492368	SV_221	SV_114	0.927634	6.81679	-0.011583	+
173	-6.35698	1.67595	SV_48	SV_243	0.927634	-0.989821	7.35769	+
174	-6.35698	1.67595	SV_48	SV_221	0.942857	-8.40812	-0.492368	+
175	-7.70213	1.4732	SV_102	SV_138	0.985611	-7.81898	1.56639	+
176	-7.70213	1.4732	SV_102	SV_135	0.985611	-8.04485	-1.6104	+
177	-2.4831	7.65151	SV_17	SV_57	-0.942857	-6.86928	0.00763246	-
178	-2.4831	7.65151	SV_17	SV_22	0.942857	-6.57549	1.4732	+
179	-2.4831	7.65151	SV_17	SV_27	1	-7.13881	1.29944	+
180	-2.4831	7.65151	SV_17	SV_156	0.942857	-4.02194	7.15151	+
181	-2.4831	7.65151	SV_17	SV_86	0.942857	-3.53076	-6.57604	+
182	0.189251	8.48193	SV_5	SV_28	0.942857	-2.11982	7.15151	+
183	0.189251	8.48193	SV_5	SV_24	0.971008	-3.07088	5.84249	+
184	0.189251	8.48193	SV_5	SV_19	-0.927634	3.9151	6.35224	-
185	0.189251	8.48193	SV_5	SV_103	0.941124	-0.998867	7.54758	+
186	0.371662	8.42837	SV_12	SV_20	0.942857	0.814576	8.08006	+
187	0.371662	8.42837	SV_12	SV_36	0.985611	-6.1416	2.22471	+
188	0.371662	8.42837	SV_12	SV_48	0.942857	-6.35698	1.67595	+
189	0.540641	8.34125	SV_74	SV_102	-0.927634	-7.70213	1.4732	-
190	0.909632	7.91542	SV_67	SV_123	0.927634	0.458227	6.61116	+
191	0.998867	7.54758	SV_33	SV_102	0.942857	-7.70213	1.4732	+
192	0.998867	7.54758	SV_33	SV_138	0.927634	-7.81898	1.56639	+
193	0.998867	7.54758	SV_33	SV_135	0.927634	-8.04485	-1.6104	+
194	0.998867	7.54758	SV_33	SV_198	-0.942857	-3.65867	7.65151	-
195	0.945001	7.17293	SV_42	SV_137	-0.927634	-6.50601	-1.1104	-
196	0.945001	7.17293	SV_42	SV_53	0.927634	4.41612	-7.06201	+
197	0.945001	7.17293	SV_42	SV_139	-0.927634	-7.57269	1.39847	-
198	0.945001	7.17293	SV_42	SV_185	0.942857	-0.866025	7	+
199	0.866025	7	SV_111	SV_53	0.927634	4.41612	-7.06201	+
200	0.866025	7	SV_111	SV_138	0.927634	-7.81898	1.56639	+
201	0.866025	7	SV_111	SV_45	-0.941124	-7.92064	1.67595	-
202	0.866025	7	SV_111	SV_135	0.927634	-8.04485	-1.6104	+
203	0.866025	7	SV_111	SV_185	0.942857	-0.866025	7	+
204	0.866025	7	SV_111	SV_80	-0.941124	-7.70213	3.12568	-
205	0.866025	7	SV_111	SV_364	0.927634	2.18304	6.35224	+
206	-0.866025	7	SV_185	SV_80	-0.941124	-7.70213	3.12568	-
207	-0.971812	7.73576	SV_248	SV_452	0.985611	0.619184	-7.02476	+
208	-0.971812	7.73576	SV_248	SV_230	0.942857	6.34961	2.94566	+
209	-0.690079	8.22373	SV_158	SV_552	0.941176	-8.04485	0.00763246	+
210	3.9151	6.35224	SV_19	SV_103	-0.924062	-0.998867	7.54758	-
211	5.57145	6.02085	SV_85	SV_237	1	3.49224	-5.67932	+
212	5.57145	6.02085	SV_85	SV_221	0.942857	-8.40812	-0.492368	+
213	7.91328	2.94566	SV_29	SV_85	0.927634	5.57145	6.02085	+
214	7.91328	2.94566	SV_29	SV_237	0.927634	3.49224	-5.67932	+
215	8.10637	2.09965	SV_58	SV_287	0.927634	-1.54687	-8.33875	+
216	8.10637	2.09965	SV_58	SV_34	1	3.04907	7.85224	+
217	6.69756	1.4212	SV_257	SV_261	-0.970588	6.15652	2.09965	-
218	7.11756	-1.71732	SV_104	SV_257	0.985611	6.69756	1.4212	+
219	7.11756	-1.71732	SV_104	SV_261	-0.985611	6.15652	2.09965	-
220	7.11756	-1.71732	SV_104	SV_253	0.927634	-0.189251	8.48193	+
221	3.70901	-6.76911	SV_118	SV_273	-0.927634	3.49224	-6.44469	-
222	3.70901	-6.76911	SV_118	SV_150	0.925476	-7.81898	3.0325	+
223	3.70901	-6.76911	SV_118	SV_503	0.954864	-5.26281	-6.57604	+
224	3.70901	-6.76911	SV_118	SV_364	0.941176	2.18304	6.35224	+
225	3.70901	-6.76911	SV_118	SV_209	0.927634	4.03343	-5.13813	+
226	0.619184	-7.02476	SV_452	SV_230	0.927634	6.34961	2.94566	+
227	-1.54687	-6.33875	SV_70	SV_50	0.942857	-7.43356	1.34387	+
228	-0.546873	-7.33875	SV_98	SV_197	0.942857	-8.13601	2.37417	+
229	-0.546873	-7.33875	SV_98	SV_248	0.942857	-0.971812	7.73576	+
230	-0.546873	-7.33875	SV_98	SV_452	0.927634	0.619184	-7.02476	+
231	-1.54687	-8.33875	SV_287	SV_34	0.927634	3.04907	7.85224	+
232	-1.54687	-8.33875	SV_287	SV_81	0.927634	-8.13601	2.22471	+
233	-6.86928	0.00763246	SV_57	SV_345	-0.942857	4.03343	-6.98589	-
234	-6.86928	0.00763246	SV_57	SV_27	-0.942857	-7.13881	1.29944	-
235	-6.86928	0.00763246	SV_57	SV_47	-0.942857	3.41612	-6.06201	-
236	-6.86928	0.00763246	SV_57	SV_202	0.941124	3.04907	5.85224	+
237	-6.86928	0.00763246	SV_57	SV_156	-1	-4.02194	7.15151	-
238	-6.86928	0.00763246	SV_57	SV_88	-0.941124	-7.57269	3.20041	-
239	-6.50601	-1.1104	SV_137	SV_45	0.954864	-7.92064	1.67595	+
240	-6.50601	-1.1104	SV_137	SV_185	-0.985611	-0.866025	7	-
241	-6.50601	-1.1104	SV_137	SV_80	0.954864	-7.70213	3.12568	+
242	-7.45706	-1.80138	SV_160	SV_243	0.927634	-0.989821	7.35769	+
243	-7.45706	-1.80138	SV_160	SV_86	0.942857	-3.53076	-6.57604	+
244	-6.84405	3.25502	SV_16	SV_31	0.942857	5.12322	-5.3549	+
245	-6.84405	3.25502	SV_16	SV_107	0.942857	8.3256	-1.27763	+
246	-6.84405	3.25502	SV_16	SV_54	-0.927634	-8.11373	2.07692	-
247	-6.84405	3.25502	SV_16	SV_204	0.985611	-0.945001	7.17293	+
248	-6.84405	3.25502	SV_16	SV_157	0.92582	5.57145	4.02085	+
249	-6.84405	3.25502	SV_16	SV_230	0.942857	6.34961	2.94566	+
250	-6.70492	3.20041	SV_15	SV_322	0.927634	-0.909632	7.91542	+
251	-6.57549	3.12568	SV_7	SV_38	0.942857	-6.45863	3.0325	+
252	-6.57549	3.12568	SV_7	SV_36	0.927634	-6.1416	2.22471	+
253	-6.57549	3.12568	SV_7	SV_28	0.942857	-2.11982	7.15151	+
254	-6.57549	3.12568	SV_7	SV_32	1	-2.11982	6.53347	+
255	-6.57549	3.12568	SV_7	SV_48	0.942857	-6.35698	1.67595	+
256	-6.57549	3.12568	SV_7	SV_22	0.942857	-6.57549	1.4732	+
257	-6.57549	3.12568	SV_7	SV_243	0.985611	-0.989821	7.35769	+
258	-6.57549	3.12568	SV_7	SV_103	0.941124	-0.998867	7.54758	+
259	-6.57549	3.12568	SV_7	SV_86	0.942857	-3.53076	-6.57604	+
260	-6.35698	2.92293	SV_14	SV_30	0.942857	0.971812	7.73576	+
261	-6.35698	2.92293	SV_14	SV_79	0.942857	8.44439	-0.603979	+
262	-6.35698	2.92293	SV_14	SV_162	0.942857	-6.86928	-1.6104	+
263	-6.35698	2.92293	SV_14	SV_256	-0.985611	-0.458227	6.61116	-
264	-6.35698	2.92293	SV_14	SV_45	0.941124	-7.92064	1.67595	+
265	-6.35698	2.92293	SV_14	SV_307	0.942857	-8.40812	-1.1104	+
266	-6.35698	2.92293	SV_14	SV_80	0.941124	-7.70213	3.12568	+
267	-6.35698	2.92293	SV_14	SV_211	0.927634	-2.54687	-7.33875	+
268	-6.98976	1.31061	SV_239	SV_155	-0.927634	-8.06968	2.66478	-
269	-6.98976	1.31061	SV_239	SV_109	-0.942857	-7.92064	2.92293	-
270	-6.98976	1.31061	SV_239	SV_249	0.941124	3.70901	-5.3549	+
271	-7.81898	1.56639	SV_138	SV_45	-0.924062	-7.92064	1.67595	-
272	-7.81898	1.56639	SV_138	SV_135	1	-8.04485	-1.6104	+
273	-7.81898	1.56639	SV_138	SV_198	-0.927634	-3.65867	7.65151	-
274	-7.81898	1.56639	SV_138	SV_80	-0.924062	-7.70213	3.12568	-
275	-7.92064	1.67595	SV_45	SV_135	-0.924062	-8.04485	-1.6104	-
276	-7.92064	1.67595	SV_45	SV_185	-0.941124	-0.866025	7	-
277	-7.92064	1.67595	SV_45	SV_80	1	-7.70213	3.12568	+
278	-3.07088	5.84249	SV_24	SV_19	-0.940403	3.9151	6.35224	-
279	-3.65867	6.03347	SV_40	SV_257	0.927634	6.69756	1.4212	+
280	-3.65867	6.03347	SV_40	SV_552	0.927634	-8.04485	0.00763246	+
281	-0.281733	6.54051	SV_244	SV_249	-0.941124	3.70901	-5.3549	-
282	3.04907	5.85224	SV_202	SV_156	-0.941124	-4.02194	7.15151	-
283	8.10237	-0.011583	SV_10	SV_137	0.927634	-6.50601	-1.1104	+
284	8.10237	-0.011583	SV_10	SV_83	0.942857	0.095056	6.50453	+
285	8.10237	-0.011583	SV_10	SV_26	0.985611	-0.095056	6.50453	+
286	8.10237	-0.011583	SV_10	SV_162	0.942857	-6.86928	-1.6104	+
287	8.10237	-0.011583	SV_10	SV_307	0.942857	-8.40812	-1.1104	+
288	8.10237	-0.011583	SV_10	SV_211	0.985611	-2.54687	-7.33875	+
289	6.59355	-1.27763	SV_60	SV_114	0.940403	6.81679	-0.011583	+
290	6.59355	-1.27763	SV_60	SV_375	0.971008	-7.43356	3.25502	+
291	5.12322	-5.3549	SV_31	SV_52	0.942857	2.5213	-7.02476	+
292	5.12322	-5.3549	SV_31	SV_25	0.927634	5.34	-5.67932	+
293	5.12322	-5.3549	SV_31	SV_204	0.927634	-0.945001	7.17293	+
294	5.12322	-5.3549	SV_31	SV_248	0.942857	-0.971812	7.73576	+
295	5.12322	-5.3549	SV_31	SV_157	0.92582	5.57145	4.02085	+
296	-6.20793	2.66478	SV_59	SV_18	0.942857	-2.4831	6.03347	+
297	-7.28785	1.31061	SV_78	SV_71	0.927634	-8.00483	1.79944	+
298	-7.28785	1.31061	SV_78	SV_307	0.927634	-8.40812	-1.1104	+

## Sheet: edge_data_16S_net_Apr
	X2	Y2	OTU_2	OTU_1	weight	X1	Y1	cor
1	0.748141	8.06497	SV_42	SV_56	-0.92582	-6.05313	2.53823	-
2	0.748141	8.06497	SV_42	SV_52	-0.939336	3.77139	-6.63539	-
3	0.839216	7.91788	SV_26	SV_47	0.985611	6.0426	-4.71244	+
4	0.839216	7.91788	SV_26	SV_31	0.927634	6.0426	-5.88148	+
5	0.839216	7.91788	SV_26	SV_101	0.985611	-6.44939	2.05117	+
6	0.839216	7.91788	SV_26	SV_125	0.927634	-0.933501	7.4135	+
7	0.49353	6.70292	SV_108	SV_169	0.970588	-7.70241	2.31155	+
8	0.49353	6.70292	SV_108	SV_78	0.927634	-7.81987	2.53823	+
9	0.49353	6.70292	SV_108	SV_59	0.924062	-7.70241	3.39282	+
10	0.49353	6.70292	SV_108	SV_83	0.924062	-0.338664	8.37419	+
11	0.49353	6.70292	SV_108	SV_301	0.970588	-7.06416	3.78095	+
12	0.338664	6.62581	SV_94	SV_76	-0.927634	-0.839216	7.08212	-
13	0.338664	6.62581	SV_94	SV_117	-0.927634	-0.748141	8.06497	-
14	0.338664	6.62581	SV_94	SV_100	-0.927634	-7.62166	3.49208	-
15	-0.172265	6.57846	SV_90	SV_117	0.985184	-0.748141	8.06497	+
16	-0.338664	6.62581	SV_136	SV_85	0.937958	5.30119	5.30541	+
17	-0.338664	6.62581	SV_136	SV_165	-0.924062	-0.901712	7.75656	-
18	-0.49353	6.70292	SV_186	SV_368	-0.941124	-8.39159	0.271786	-
19	-0.49353	6.70292	SV_186	SV_405	0.935484	-7.42361	3.6532	+
20	-0.49353	6.70292	SV_186	SV_143	0.937958	4.57666	-4.71244	+
21	7.86488	2.87426	SV_29	SV_38	-0.985611	-6.25134	2.21229	-
22	7.5	0.943472	SV_2	SV_153	0.970588	2.32873	-7.68354	+
23	7.5	0.943472	SV_2	SV_326	0.970588	-0.172265	8.42154	+
24	8.3119	0.474722	SV_10	SV_49	1	-0.63159	8.19282	+
25	4.57666	-5.88148	SV_25	SV_173	1	3.27551	6.08501	+
26	4.57666	-5.88148	SV_25	SV_79	1	7.5	-0.931528	+
27	4.57666	-5.88148	SV_25	SV_70	1	-0.799954	-7.96874	+
28	4.57666	-5.88148	SV_25	SV_195	1	-7.73469	-3.35404	+
29	2.87978	-5.98759	SV_35	SV_125	0.941176	-0.933501	7.4135	+
30	2.87978	-5.98759	SV_35	SV_78	0.927634	-7.81987	2.53823	+
31	2.87978	-5.98759	SV_35	SV_59	0.954864	-7.70241	3.39282	+
32	3.43083	-7.68354	SV_73	SV_95	0.954864	-0.933501	7.5865	+
33	3.43083	-7.68354	SV_73	SV_104	0.927634	6.6881	-0.462778	+
34	3.43083	-7.68354	SV_73	SV_114	0.941176	6.6881	0.474722	+
35	-0.799954	-7.96874	SV_70	SV_195	1	-7.73469	-3.35404	+
36	-3.6696	-7.40298	SV_86	SV_96	0.927634	-6.94893	-0.776371	+
37	-3.6696	-7.40298	SV_86	SV_68	0.927634	-7.31	1.9923	+
38	-3.6696	-7.40298	SV_86	SV_185	0.985611	-0.748141	6.93503	+
39	-3.6696	-7.40298	SV_86	SV_83	0.941124	-0.338664	8.37419	+
40	-6.80885	3.78095	SV_6	SV_4	0.942857	0.172265	8.42154	+
41	-6.80885	3.78095	SV_6	SV_36	0.942857	-6.01861	2.66144	+
42	-6.80885	3.78095	SV_6	SV_30	0.927634	0.839216	7.08212	+
43	-6.80885	3.78095	SV_6	SV_41	0.941124	-5.31806	6.226	+
44	-6.80885	3.78095	SV_6	SV_108	0.927634	0.49353	6.70292	+
45	-6.80885	3.78095	SV_6	SV_169	0.927634	-7.70241	2.31155	+
46	-6.80885	3.78095	SV_6	SV_104	0.942857	6.6881	-0.462778	+
47	-6.80885	3.78095	SV_6	SV_83	0.941124	-0.338664	8.37419	+
48	-6.80885	3.78095	SV_6	SV_301	0.927634	-7.06416	3.78095	+
49	-6.80885	3.78095	SV_6	SV_114	0.927634	6.6881	0.474722	+
50	-6.25134	3.49208	SV_23	SV_14	0.985611	-6.10411	3.28349	+
51	-6.25134	3.49208	SV_23	SV_13	0.942857	5.30963	-4.35946	+
52	-6.25134	3.49208	SV_23	SV_31	0.927634	6.0426	-5.88148	+
53	-6.25134	3.49208	SV_23	SV_25	0.941124	4.57666	-5.88148	+
54	-6.25134	3.49208	SV_23	SV_173	0.941124	3.27551	6.08501	+
55	-6.25134	3.49208	SV_23	SV_79	0.941124	7.5	-0.931528	+
56	-6.25134	3.49208	SV_23	SV_70	0.941124	-0.799954	-7.96874	+
57	-6.25134	3.49208	SV_23	SV_125	0.927634	-0.933501	7.4135	+
58	-6.25134	3.49208	SV_23	SV_195	0.941124	-7.73469	-3.35404	+
59	-6.17059	3.39282	SV_7	SV_26	1	0.839216	7.91788	+
60	-6.17059	3.39282	SV_7	SV_47	0.985611	6.0426	-4.71244	+
61	-6.17059	3.39282	SV_7	SV_31	0.927634	6.0426	-5.88148	+
62	-6.17059	3.39282	SV_7	SV_101	0.985611	-6.44939	2.05117	+
63	-6.17059	3.39282	SV_7	SV_125	0.927634	-0.933501	7.4135	+
64	-6.01861	2.66144	SV_36	SV_88	0.942857	-6.17059	2.31155	+
65	-6.01861	2.66144	SV_36	SV_30	0.927634	0.839216	7.08212	+
66	-6.01861	2.66144	SV_36	SV_41	0.941124	-5.31806	6.226	+
67	-6.01861	2.66144	SV_36	SV_108	0.985611	0.49353	6.70292	+
68	-6.01861	2.66144	SV_36	SV_52	0.927634	3.77139	-6.63539	+
69	-6.01861	2.66144	SV_36	SV_169	0.927634	-7.70241	2.31155	+
70	-6.01861	2.66144	SV_36	SV_78	0.942857	-7.81987	2.53823	+
71	-6.01861	2.66144	SV_36	SV_83	0.941124	-0.338664	8.37419	+
72	-6.01861	2.66144	SV_36	SV_301	0.927634	-7.06416	3.78095	+
73	-6.01861	2.66144	SV_36	SV_114	0.927634	6.6881	0.474722	+
74	-6.44939	2.05117	SV_101	SV_125	0.941176	-0.933501	7.4135	+
75	-6.44939	2.05117	SV_101	SV_78	0.927634	-7.81987	2.53823	+
76	-6.80885	1.92342	SV_81	SV_102	1	-7.18944	1.94945	+
77	-6.80885	1.92342	SV_81	SV_130	0.927634	0.823844	-7.96874	+
78	-6.80885	1.92342	SV_81	SV_76	0.927634	-0.839216	7.08212	+
79	-6.9365	1.91468	SV_333	SV_208	1	-4.38056	5.2885	+
80	-6.9365	1.91468	SV_333	SV_440	1	-7.52815	3.57941	+
81	-7.85439	3.04292	SV_234	SV_583	1	5.98988	2.87426	+
82	-5.31806	6.226	SV_41	SV_108	0.924062	0.49353	6.70292	+
83	-5.31806	6.226	SV_41	SV_86	0.941124	-3.6696	-7.40298	+
84	-5.31806	6.226	SV_41	SV_185	0.954864	-0.748141	6.93503	+
85	-5.31806	6.226	SV_41	SV_125	0.954864	-0.933501	7.4135	+
86	-5.31806	6.226	SV_41	SV_78	0.941124	-7.81987	2.53823	+
87	-5.31806	6.226	SV_41	SV_59	0.935484	-7.70241	3.39282	+
88	-5.31806	6.226	SV_41	SV_83	1	-0.338664	8.37419	+
89	-2.45513	7.75061	SV_17	SV_76	0.985611	-0.839216	7.08212	+
90	-1.96014	7.0335	SV_28	SV_44	0.942857	-6.92279	-1.94779	+
91	-1.96014	7.0335	SV_28	SV_40	0.942857	-2.66645	6.01024	+
92	-1.96014	7.0335	SV_28	SV_89	0.971008	-7.06416	1.92342	+
93	-1.96014	7.0335	SV_28	SV_34	0.927634	3.78274	6.72105	+
94	-1.96014	7.0335	SV_28	SV_54	0.927634	-7.42361	2.05117	+
95	-1.96014	7.0335	SV_28	SV_105	0.927634	-7.62166	2.21229	+
96	-3.82147	7.0335	SV_179	SV_500	1	1.95475	6.72105	+
97	-3.82147	7.0335	SV_179	SV_234	1	-7.85439	3.04292	+
98	-3.82147	7.0335	SV_179	SV_583	1	5.98988	2.87426	+
99	6.93195	-2.86323	SV_140	SV_103	0.935484	-0.63159	6.80718	+
100	6.93195	-2.86323	SV_140	SV_72	1	-7.76889	2.42087	+
101	6.93195	-2.86323	SV_140	SV_66	1	4.39564	-5.08835	+
102	0.0119449	-6.56249	SV_93	SV_126	-0.937958	-2.85771	-5.99673	-
103	0.0119449	-6.56249	SV_93	SV_19	0.935484	2.86875	7.86717	+
104	0.0119449	-6.56249	SV_93	SV_310	0.935484	-6.60836	0.271786	+
105	0.0119449	-6.56249	SV_93	SV_151	0.935484	0.63159	6.80718	+
106	0.0119449	-6.56249	SV_93	SV_405	0.935484	-7.42361	3.6532	+
107	-6.00119	2.78821	SV_15	SV_32	0.941176	-2.01423	6.58805	+
108	-6.00119	2.78821	SV_15	SV_88	0.927634	-6.17059	2.31155	+
109	-6.00119	2.78821	SV_15	SV_69	0.927634	-2.26913	6.21877	+
110	-6.00119	2.78821	SV_15	SV_294	1	-0.839216	7.91788	+
111	-6.00119	2.78821	SV_15	SV_87	0.954864	-7.87182	2.91616	+
112	-4.38056	5.2885	SV_208	SV_440	1	-7.52815	3.57941	+
113	-6.05313	2.53823	SV_56	SV_88	0.942857	-6.17059	2.31155	+
114	-6.05313	2.53823	SV_56	SV_52	0.985611	3.77139	-6.63539	+
115	-6.05313	2.53823	SV_56	SV_130	0.927634	0.823844	-7.96874	+
116	-6.05313	2.53823	SV_56	SV_73	0.985611	3.43083	-7.68354	+
117	-6.05313	2.53823	SV_56	SV_95	0.941124	-0.933501	7.5865	+
118	-6.05313	2.53823	SV_56	SV_114	0.927634	6.6881	0.474722	+
119	-3.76738	6.58805	SV_149	SV_68	0.985184	-7.31	1.9923	+
120	-3.76738	6.58805	SV_149	SV_51	0.937958	2.46198	6.08501	+
121	0.49353	8.29708	SV_20	SV_39	0.942857	5.7164	-4.4523	+
122	0.49353	8.29708	SV_20	SV_15	0.985611	-6.00119	2.78821	+
123	0.49353	8.29708	SV_20	SV_32	0.927634	-2.01423	6.58805	+
124	0.49353	8.29708	SV_20	SV_88	0.942857	-6.17059	2.31155	+
125	0.49353	8.29708	SV_20	SV_294	0.985611	-0.839216	7.91788	+
126	0.49353	8.29708	SV_20	SV_87	0.941124	-7.87182	2.91616	+
127	2.86875	7.86717	SV_19	SV_310	1	-6.60836	0.271786	+
128	2.86875	7.86717	SV_19	SV_25	0.935484	4.57666	-5.88148	+
129	2.86875	7.86717	SV_19	SV_173	0.935484	3.27551	6.08501	+
130	2.86875	7.86717	SV_19	SV_79	0.935484	7.5	-0.931528	+
131	2.86875	7.86717	SV_19	SV_70	0.935484	-0.799954	-7.96874	+
132	2.86875	7.86717	SV_19	SV_195	0.935484	-7.73469	-3.35404	+
133	-6.34486	2.12495	SV_45	SV_99	1	-7.52815	2.12495	+
134	-7.81987	2.53823	SV_78	SV_83	0.941124	-0.338664	8.37419	+
135	-3.66235	7.45306	SV_167	SV_262	0.92	-7.87182	2.78821	+
136	3.78274	6.72105	SV_34	SV_54	1	-7.42361	2.05117	+
137	3.78274	6.72105	SV_34	SV_105	1	-7.62166	2.21229	+
138	3.78274	6.72105	SV_34	SV_169	0.941176	-7.70241	2.31155	+
139	3.78274	6.72105	SV_34	SV_301	0.941176	-7.06416	3.78095	+
140	8.3119	-0.462778	SV_60	SV_141	-0.924062	-0.901712	7.24344	-
141	6.6881	-0.462778	SV_104	SV_114	0.985611	6.6881	0.474722	+
142	6.0426	-5.88148	SV_31	SV_101	0.941176	-6.44939	2.05117	+
143	6.0426	-5.88148	SV_31	SV_368	-0.927634	-8.39159	0.271786	-
144	-2.85771	-5.99673	SV_126	SV_19	-0.937958	2.86875	7.86717	-
145	-2.85771	-5.99673	SV_126	SV_310	-0.937958	-6.60836	0.271786	-
146	-2.85771	-5.99673	SV_126	SV_60	-0.925476	8.3119	-0.462778	-
147	-7.62166	2.21229	SV_105	SV_169	0.941176	-7.70241	2.31155	+
148	-7.62166	2.21229	SV_105	SV_301	0.941176	-7.06416	3.78095	+
149	-2.26913	6.21877	SV_69	SV_81	0.942857	-6.80885	1.92342	+
150	-2.26913	6.21877	SV_69	SV_102	0.942857	-7.18944	1.94945	+
151	-2.26913	6.21877	SV_69	SV_103	0.941124	-0.63159	6.80718	+
152	-2.26913	6.21877	SV_69	SV_294	0.927634	-0.839216	7.91788	+
153	-7.49998	0.919583	SV_37	SV_86	0.942857	-3.6696	-7.40298	+
154	-7.49998	0.919583	SV_37	SV_185	0.927634	-0.748141	6.93503	+
155	-7.49998	0.919583	SV_37	SV_91	0.927634	-8.05103	-0.776371	+
156	-7.49998	0.919583	SV_37	SV_59	0.941124	-7.70241	3.39282	+
157	-6.10411	2.42087	SV_48	SV_96	0.927634	-6.94893	-0.776371	+
158	-6.10411	2.42087	SV_48	SV_87	0.941124	-7.87182	2.91616	+
159	-6.17059	2.31155	SV_88	SV_52	0.927634	3.77139	-6.63539	+
160	-6.17059	2.31155	SV_88	SV_73	0.927634	3.43083	-7.68354	+
161	-6.17059	2.31155	SV_88	SV_294	0.927634	-0.839216	7.91788	+
162	-6.563	3.71207	SV_3	SV_149	0.971008	-3.76738	6.58805	+
163	-6.563	3.71207	SV_3	SV_68	0.927634	-7.31	1.9923	+
164	-6.563	3.71207	SV_3	SV_153	0.927634	2.32873	-7.68354	+
165	-6.563	3.71207	SV_3	SV_51	0.941124	2.46198	6.08501	+
166	-6.563	1.9923	SV_84	SV_127	-0.924062	1.14810637420064e-16	6.5625	-
167	-6.563	1.9923	SV_84	SV_81	0.941124	-6.80885	1.92342	+
168	-6.563	1.9923	SV_84	SV_102	0.941124	-7.18944	1.94945	+
169	-6.563	1.9923	SV_84	SV_103	0.935484	-0.63159	6.80718	+
170	3.27551	6.08501	SV_173	SV_79	1	7.5	-0.931528	+
171	3.27551	6.08501	SV_173	SV_70	1	-0.799954	-7.96874	+
172	3.27551	6.08501	SV_173	SV_195	1	-7.73469	-3.35404	+
173	6.0426	-4.71244	SV_47	SV_31	0.941176	6.0426	-5.88148	+
174	6.0426	-4.71244	SV_47	SV_101	1	-6.44939	2.05117	+
175	6.0426	-4.71244	SV_47	SV_125	0.941176	-0.933501	7.4135	+
176	6.0426	-4.71244	SV_47	SV_78	0.927634	-7.81987	2.53823	+
177	0.823844	-7.96874	SV_130	SV_73	0.941176	3.43083	-7.68354	+
178	-7.31	1.9923	SV_68	SV_185	0.941176	-0.748141	6.93503	+
179	5.30119	5.30541	SV_85	SV_201	-0.95533	-7.85439	2.66144	-
180	-3.51248	6.21877	SV_154	SV_94	-0.927634	0.338664	6.62581	-
181	-3.51248	6.21877	SV_154	SV_90	0.985184	-0.172265	6.57846	+
182	-3.51248	6.21877	SV_154	SV_117	1	-0.748141	8.06497	+
183	-0.839216	7.91788	SV_294	SV_87	0.954864	-7.87182	2.91616	+
184	5.30963	-6.23446	SV_46	SV_140	0.941124	6.93195	-2.86323	+
185	5.30963	-6.23446	SV_46	SV_72	0.941124	-7.76889	2.42087	+
186	5.30963	-6.23446	SV_46	SV_66	0.941124	4.39564	-5.08835	+
187	-6.34486	3.57941	SV_22	SV_7	0.927634	-6.17059	3.39282	+
188	-6.34486	3.57941	SV_22	SV_20	0.927634	0.49353	8.29708	+
189	-6.34486	3.57941	SV_22	SV_26	0.927634	0.839216	7.91788	+
190	-6.34486	3.57941	SV_22	SV_39	0.927634	5.7164	-4.4523	+
191	-6.34486	3.57941	SV_22	SV_47	0.970588	6.0426	-4.71244	+
192	-6.34486	3.57941	SV_22	SV_88	0.927634	-6.17059	2.31155	+
193	-6.34486	3.57941	SV_22	SV_101	0.970588	-6.44939	2.05117	+
194	-6.34486	3.57941	SV_22	SV_87	0.924062	-7.87182	2.91616	+
195	-7.42361	2.05117	SV_54	SV_105	1	-7.62166	2.21229	+
196	-7.42361	2.05117	SV_54	SV_169	0.941176	-7.70241	2.31155	+
197	-7.42361	2.05117	SV_54	SV_301	0.941176	-7.06416	3.78095	+
198	0	8.4375	SV_5	SV_154	0.927634	-3.51248	6.21877	+
199	0	8.4375	SV_5	SV_94	-1	0.338664	6.62581	-
200	0	8.4375	SV_5	SV_76	0.927634	-0.839216	7.08212	+
201	0	8.4375	SV_5	SV_117	0.927634	-0.748141	8.06497	+
202	0	8.4375	SV_5	SV_100	0.927634	-7.62166	3.49208	+
203	0.172265	8.42154	SV_4	SV_39	0.942857	5.7164	-4.4523	+
204	0.172265	8.42154	SV_4	SV_15	0.927634	-6.00119	2.78821	+
205	0.172265	8.42154	SV_4	SV_88	0.942857	-6.17059	2.31155	+
206	0.172265	8.42154	SV_4	SV_73	0.927634	3.43083	-7.68354	+
207	0.172265	8.42154	SV_4	SV_294	0.927634	-0.839216	7.91788	+
208	0.338664	8.37419	SV_12	SV_104	0.985611	6.6881	-0.462778	+
209	0.338664	8.37419	SV_12	SV_114	0.955882	6.6881	0.474722	+
210	0.63159	8.19282	SV_33	SV_13	-0.942857	5.30963	-4.35946	-
211	0.901712	7.75656	SV_64	SV_154	-0.927634	-3.51248	6.21877	-
212	0.901712	7.75656	SV_64	SV_136	-0.941124	-0.338664	6.62581	-
213	0.901712	7.75656	SV_64	SV_117	-0.927634	-0.748141	8.06497	-
214	0.901712	7.75656	SV_64	SV_100	-0.927634	-7.62166	3.49208	-
215	0.933501	7.5865	SV_145	SV_374	0.92	4.39564	-5.50558	+
216	0.933501	7.5865	SV_145	SV_361	1	1.98816	-6.63539	+
217	0.933501	7.4135	SV_74	SV_422	1	-5.31806	4.351	+
218	0.933501	7.4135	SV_74	SV_179	1	-3.82147	7.0335	+
219	0.933501	7.4135	SV_74	SV_500	1	1.95475	6.72105	+
220	0.933501	7.4135	SV_74	SV_234	1	-7.85439	3.04292	+
221	0.933501	7.4135	SV_74	SV_583	1	5.98988	2.87426	+
222	0.839216	7.08212	SV_30	SV_40	0.927634	-2.66645	6.01024	+
223	0.839216	7.08212	SV_30	SV_108	0.970588	0.49353	6.70292	+
224	0.839216	7.08212	SV_30	SV_89	0.925476	-7.06416	1.92342	+
225	0.839216	7.08212	SV_30	SV_34	0.941176	3.78274	6.72105	+
226	0.839216	7.08212	SV_30	SV_54	0.941176	-7.42361	2.05117	+
227	0.839216	7.08212	SV_30	SV_105	0.941176	-7.62166	2.21229	+
228	0.839216	7.08212	SV_30	SV_169	1	-7.70241	2.31155	+
229	0.839216	7.08212	SV_30	SV_59	0.954864	-7.70241	3.39282	+
230	0.839216	7.08212	SV_30	SV_301	1	-7.06416	3.78095	+
231	-0.63159	6.80718	SV_103	SV_72	0.935484	-7.76889	2.42087	+
232	-0.63159	6.80718	SV_103	SV_66	0.935484	4.39564	-5.08835	+
233	-0.748141	6.93503	SV_185	SV_83	0.954864	-0.338664	8.37419	+
234	1.95475	6.72105	SV_500	SV_234	1	-7.85439	3.04292	+
235	1.95475	6.72105	SV_500	SV_583	1	5.98988	2.87426	+
236	6.92738	3.81176	SV_8	SV_14	0.927634	-6.10411	3.28349	+
237	6.92738	3.81176	SV_8	SV_47	0.927634	6.0426	-4.71244	+
238	6.92738	3.81176	SV_8	SV_36	0.942857	-6.01861	2.66144	+
239	6.92738	3.81176	SV_8	SV_41	0.941124	-5.31806	6.226	+
240	6.92738	3.81176	SV_8	SV_101	0.927634	-6.44939	2.05117	+
241	6.92738	3.81176	SV_8	SV_35	0.927634	2.87978	-5.98759	+
242	6.92738	3.81176	SV_8	SV_108	0.927634	0.49353	6.70292	+
243	6.92738	3.81176	SV_8	SV_125	0.985611	-0.933501	7.4135	+
244	6.92738	3.81176	SV_8	SV_78	1	-7.81987	2.53823	+
245	6.92738	3.81176	SV_8	SV_83	0.941124	-0.338664	8.37419	+
246	6.92738	1.93676	SV_58	SV_201	-0.927634	-7.85439	2.66144	-
247	6.92738	1.93676	SV_58	SV_405	-0.941124	-7.42361	3.6532	-
248	5.30963	-4.35946	SV_13	SV_25	0.941124	4.57666	-5.88148	+
249	5.30963	-4.35946	SV_13	SV_173	0.941124	3.27551	6.08501	+
250	5.30963	-4.35946	SV_13	SV_79	0.941124	7.5	-0.931528	+
251	5.30963	-4.35946	SV_13	SV_70	0.941124	-0.799954	-7.96874	+
252	5.30963	-4.35946	SV_13	SV_195	0.941124	-7.73469	-3.35404	+
253	6.22363	-5.50558	SV_55	SV_31	0.927634	6.0426	-5.88148	+
254	6.22363	-5.50558	SV_55	SV_186	0.941124	-0.49353	6.70292	+
255	6.22363	-5.50558	SV_55	SV_368	-0.942857	-8.39159	0.271786	-
256	4.39564	-5.50558	SV_374	SV_361	0.92	1.98816	-6.63539	+
257	-6.92279	-1.94779	SV_44	SV_30	0.927634	0.839216	7.08212	+
258	-6.92279	-1.94779	SV_44	SV_169	0.927634	-7.70241	2.31155	+
259	-6.92279	-1.94779	SV_44	SV_301	0.927634	-7.06416	3.78095	+
260	-6.1109	-3.35404	SV_82	SV_96	0.985184	-6.94893	-0.776371	+
261	-6.1109	-3.35404	SV_82	SV_68	0.925476	-7.31	1.9923	+
262	-6.1109	-3.35404	SV_82	SV_185	0.925476	-0.748141	6.93503	+
263	-6.94893	-0.776371	SV_96	SV_185	0.941176	-0.748141	6.93503	+
264	-6.10411	3.28349	SV_14	SV_31	0.941176	6.0426	-5.88148	+
265	-6.10411	3.28349	SV_14	SV_25	0.954864	4.57666	-5.88148	+
266	-6.10411	3.28349	SV_14	SV_173	0.954864	3.27551	6.08501	+
267	-6.10411	3.28349	SV_14	SV_79	0.954864	7.5	-0.931528	+
268	-6.10411	3.28349	SV_14	SV_70	0.954864	-0.799954	-7.96874	+
269	-6.10411	3.28349	SV_14	SV_125	0.941176	-0.933501	7.4135	+
270	-6.10411	3.28349	SV_14	SV_78	0.927634	-7.81987	2.53823	+
271	-6.10411	3.28349	SV_14	SV_195	0.954864	-7.73469	-3.35404	+
272	-6.00119	2.91616	SV_50	SV_165	0.927634	-0.901712	7.75656	+
273	-6.68357	1.94945	SV_193	SV_60	-0.924062	8.3119	-0.462778	-
274	-6.68357	1.94945	SV_193	SV_141	1	-0.901712	7.24344	+
275	-7.06416	1.92342	SV_89	SV_34	0.985184	3.78274	6.72105	+
276	-7.06416	1.92342	SV_89	SV_54	0.985184	-7.42361	2.05117	+
277	-7.06416	1.92342	SV_89	SV_105	0.985184	-7.62166	2.21229	+
278	-7.06416	1.92342	SV_89	SV_169	0.925476	-7.70241	2.31155	+
279	-7.06416	1.92342	SV_89	SV_301	0.925476	-7.06416	3.78095	+
280	-7.18944	1.94945	SV_102	SV_130	0.927634	0.823844	-7.96874	+
281	-7.18944	1.94945	SV_102	SV_76	0.927634	-0.839216	7.08212	+
282	-7.70241	2.31155	SV_169	SV_59	0.954864	-7.70241	3.39282	+
283	-7.70241	2.31155	SV_169	SV_301	1	-7.06416	3.78095	+
284	-7.70241	3.39282	SV_59	SV_83	0.935484	-0.338664	8.37419	+
285	-7.70241	3.39282	SV_59	SV_301	0.954864	-7.06416	3.78095	+
286	-5.31806	4.351	SV_422	SV_179	1	-3.82147	7.0335	+
287	-5.31806	4.351	SV_422	SV_500	1	1.95475	6.72105	+
288	-5.31806	4.351	SV_422	SV_234	1	-7.85439	3.04292	+
289	-5.31806	4.351	SV_422	SV_583	1	5.98988	2.87426	+
290	-2.8908	7.85799	SV_18	SV_21	-0.942857	-6.01861	3.04292	-
291	-2.11926	7.45306	SV_24	SV_170	0.971008	-2.04581	-7.40298	+
292	-2.01423	6.58805	SV_32	SV_69	0.985611	-2.26913	6.21877	+
293	-2.01423	6.58805	SV_32	SV_81	0.927634	-6.80885	1.92342	+
294	-2.01423	6.58805	SV_32	SV_102	0.927634	-7.18944	1.94945	+
295	-2.01423	6.58805	SV_32	SV_103	0.954864	-0.63159	6.80718	+
296	-2.01423	6.58805	SV_32	SV_294	0.941176	-0.839216	7.91788	+
297	-2.66645	6.01024	SV_40	SV_89	0.971008	-7.06416	1.92342	+
298	-2.66645	6.01024	SV_40	SV_34	0.985611	3.78274	6.72105	+
299	-2.66645	6.01024	SV_40	SV_54	0.985611	-7.42361	2.05117	+
300	-2.66645	6.01024	SV_40	SV_105	0.985611	-7.62166	2.21229	+
301	-2.66645	6.01024	SV_40	SV_169	0.927634	-7.70241	2.31155	+
302	-2.66645	6.01024	SV_40	SV_301	0.927634	-7.06416	3.78095	+
303	7.5	-0.931528	SV_79	SV_70	1	-0.799954	-7.96874	+
304	7.5	-0.931528	SV_79	SV_195	1	-7.73469	-3.35404	+
305	-6.60836	0.271786	SV_310	SV_25	0.935484	4.57666	-5.88148	+
306	-6.60836	0.271786	SV_310	SV_173	0.935484	3.27551	6.08501	+
307	-6.60836	0.271786	SV_310	SV_79	0.935484	7.5	-0.931528	+
308	-6.60836	0.271786	SV_310	SV_70	0.935484	-0.799954	-7.96874	+
309	-6.60836	0.271786	SV_310	SV_195	0.935484	-7.73469	-3.35404	+
310	-6.68357	3.75492	SV_11	SV_17	-0.942857	-2.45513	7.75061	-
311	-6.68357	3.75492	SV_11	SV_43	-0.942857	0.748141	6.93503	-
312	0.901712	7.24344	SV_62	SV_154	0.954864	-3.51248	6.21877	+
313	0.901712	7.24344	SV_62	SV_90	0.937958	-0.172265	6.57846	+
314	0.901712	7.24344	SV_62	SV_136	0.935484	-0.338664	6.62581	+
315	0.901712	7.24344	SV_62	SV_85	0.937958	5.30119	5.30541	+
316	0.901712	7.24344	SV_62	SV_165	-0.924062	-0.901712	7.75656	-
317	0.901712	7.24344	SV_62	SV_117	0.954864	-0.748141	8.06497	+
318	0.63159	6.80718	SV_151	SV_58	-0.941124	6.92738	1.93676	-
319	0.63159	6.80718	SV_151	SV_186	0.935484	-0.49353	6.70292	+
320	0.63159	6.80718	SV_151	SV_405	1	-7.42361	3.6532	+
321	-0.933501	7.4135	SV_125	SV_78	0.985611	-7.81987	2.53823	+
322	-0.933501	7.4135	SV_125	SV_83	0.954864	-0.338664	8.37419	+
323	5.7164	-4.4523	SV_39	SV_15	0.927634	-6.00119	2.78821	+
324	5.7164	-4.4523	SV_39	SV_36	0.942857	-6.01861	2.66144	+
325	5.7164	-4.4523	SV_39	SV_56	0.942857	-6.05313	2.53823	+
326	5.7164	-4.4523	SV_39	SV_88	1	-6.17059	2.31155	+
327	5.7164	-4.4523	SV_39	SV_52	0.927634	3.77139	-6.63539	+
328	5.7164	-4.4523	SV_39	SV_73	0.927634	3.43083	-7.68354	+
329	5.7164	-4.4523	SV_39	SV_294	0.927634	-0.839216	7.91788	+
330	3.77139	-6.63539	SV_52	SV_73	0.970588	3.43083	-7.68354	+
331	3.77139	-6.63539	SV_52	SV_95	0.924062	-0.933501	7.5865	+
332	3.77139	-6.63539	SV_52	SV_104	0.927634	6.6881	-0.462778	+
333	3.77139	-6.63539	SV_52	SV_114	0.970588	6.6881	0.474722	+
334	-6.9365	3.78968	SV_1	SV_4	0.942857	0.172265	8.42154	+
335	-6.9365	3.78968	SV_1	SV_20	0.942857	0.49353	8.29708	+
336	-6.9365	3.78968	SV_1	SV_15	0.985611	-6.00119	2.78821	+
337	-6.9365	3.78968	SV_1	SV_32	0.927634	-2.01423	6.58805	+
338	-6.9365	3.78968	SV_1	SV_48	0.942857	-6.10411	2.42087	+
339	-6.9365	3.78968	SV_1	SV_69	0.942857	-2.26913	6.21877	+
340	-6.9365	3.78968	SV_1	SV_294	0.985611	-0.839216	7.91788	+
341	-6.9365	3.78968	SV_1	SV_87	0.941124	-7.87182	2.91616	+
342	-6.05313	3.16613	SV_27	SV_40	0.942857	-2.66645	6.01024	+
343	-6.05313	3.16613	SV_27	SV_34	0.927634	3.78274	6.72105	+
344	-6.05313	3.16613	SV_27	SV_54	0.927634	-7.42361	2.05117	+
345	-6.05313	3.16613	SV_27	SV_105	0.927634	-7.62166	2.21229	+
346	-7.76889	2.42087	SV_72	SV_66	1	4.39564	-5.08835	+

## Sheet: edge_data_16S_net_May
	X2	Y2	OTU_2	OTU_1	weight	X1	Y1	cor
1	0.579258	8.40134	SV_20	SV_65	-0.942857	7.31348	-1.66225	-
2	0.579258	8.40134	SV_20	SV_36	0.927634	-6.38823	1.11489	+
3	0.87276	8.12149	SV_33	SV_57	0.927634	-7.30814	-0.61411	+
4	0.87276	8.12149	SV_33	SV_48	0.942857	-6.75208	0.739655	+
5	0.87276	8.12149	SV_33	SV_111	0.942857	-0.301856	6.47197	+
6	0.87276	8.12149	SV_33	SV_55	-0.941124	4.82449	-4.90792	-
7	0.87276	8.12149	SV_33	SV_113	0.942857	-3.98459	5.94564	+
8	0.87276	8.12149	SV_33	SV_165	0.985611	-0.39821	8.49468	+
9	0.490957	6.54768	SV_103	SV_316	-0.924062	-4.2759	6.36768	-
10	-0.101846	6.43342	SV_83	SV_148	0.927634	-7.98782	0.815873	+
11	-0.101846	6.43342	SV_83	SV_281	-0.941124	5.40418	-5.63482	-
12	-0.101846	6.43342	SV_83	SV_260	0.985611	-8.03793	2.4424	+
13	-0.101846	6.43342	SV_83	SV_122	0.942857	-0.87276	8.12149	+
14	-0.101846	6.43342	SV_83	SV_116	-1	-0.73937	8.27543	-
15	-0.101846	6.43342	SV_83	SV_79	0.985611	6.23939	1.6739	+
16	-0.101846	6.43342	SV_83	SV_237	-0.941124	4.82449	-4.43108	-
17	-0.101846	6.43342	SV_83	SV_268	-0.941124	-7.44778	2.71391	-
18	6.78949	5.21456	SV_29	SV_153	-0.942857	2.19192	-6.75282	-
19	7.31082	0.602469	SV_114	SV_54	-0.985611	-7.823	2.59454	-
20	5.40418	-5.63482	SV_281	SV_177	0.954864	-0.927884	6.96429	+
21	5.40418	-5.63482	SV_281	SV_260	-0.924062	-8.03793	2.4424	-
22	5.40418	-5.63482	SV_281	SV_116	0.941124	-0.73937	8.27543	+
23	5.40418	-5.63482	SV_281	SV_79	-0.924062	6.23939	1.6739	-
24	5.40418	-5.63482	SV_281	SV_237	1	4.82449	-4.43108	+
25	5.40418	-5.63482	SV_281	SV_268	1	-7.44778	2.71391	+
26	4.82449	-4.43108	SV_237	SV_268	1	-7.44778	2.71391	+
27	-3.24182	-5.69175	SV_164	SV_100	0.941176	-7.64092	0.629593	+
28	-6.84327	-2.65086	SV_129	SV_113	0.927634	-3.98459	5.94564	+
29	-7.18445	2.71391	SV_3	SV_10	-0.942857	8.38225	1.6739	-
30	-7.18445	2.71391	SV_3	SV_38	0.942857	-6.28559	1.35739	+
31	-7.18445	2.71391	SV_3	SV_34	0.927634	4.32402	6.75801	+
32	-7.18445	2.71391	SV_3	SV_25	-0.927634	6.70673	-5.33752	-
33	-7.18445	2.71391	SV_3	SV_82	0.942857	-5.85415	-5.7596	+
34	-7.18445	2.71391	SV_3	SV_128	1	5.86161	3.60741	+
35	-8.37486	1.48625	SV_81	SV_240	0.985611	-3.53051	5.70732	+
36	-8.37486	1.48625	SV_81	SV_144	1	-7.93516	2.5251	+
37	-8.38297	1.74946	SV_197	SV_86	-0.927634	-3.24182	-7.83461	-
38	-8.38297	1.74946	SV_197	SV_123	-0.927634	-1.04123	7.7526	-
39	-8.20926	2.24242	SV_225	SV_93	0.927634	-1.05948	-7.49999	+
40	-8.20926	2.24242	SV_225	SV_360	0.941124	5.40418	-3.70418	+
41	-2.21048	6.87676	SV_28	SV_41	0.924062	-5.87648	4.66015	+
42	-2.21048	6.87676	SV_28	SV_24	0.924062	-2.56361	5.94564	+
43	-2.21048	6.87676	SV_28	SV_212	-0.941176	-0.809732	6.79836	-
44	-3.53051	5.70732	SV_240	SV_144	0.985611	-7.93516	2.5251	+
45	0.39821	8.49468	SV_12	SV_199	-0.941124	-8.27522	2.12818	-
46	0.39821	8.49468	SV_12	SV_93	0.927634	-1.05948	-7.49999	+
47	0.39821	8.49468	SV_12	SV_40	-1	-4.15587	7.35625	-
48	-0.662313	6.6578	SV_151	SV_197	-0.941176	-8.38297	1.74946	-
49	-0.662313	6.6578	SV_151	SV_123	0.985611	-1.04123	7.7526	+
50	7.31348	-1.66225	SV_65	SV_36	-0.927634	-6.38823	1.11489	-
51	-6.42297	2.24242	SV_14	SV_73	-0.942857	4.33478	-6.75282	-
52	-6.42297	2.24242	SV_14	SV_148	0.927634	-7.98782	0.815873	+
53	-6.42297	2.24242	SV_14	SV_281	-0.941124	5.40418	-5.63482	-
54	-6.42297	2.24242	SV_14	SV_237	-0.941124	4.82449	-4.43108	-
55	-6.42297	2.24242	SV_14	SV_268	-0.941124	-7.44778	2.71391	-
56	-6.28559	1.35739	SV_38	SV_34	0.927634	4.32402	6.75801	+
57	-6.28559	1.35739	SV_38	SV_25	-0.985611	6.70673	-5.33752	-
58	-6.28559	1.35739	SV_38	SV_82	1	-5.85415	-5.7596	+
59	-6.28559	1.35739	SV_38	SV_128	0.942857	5.86161	3.60741	+
60	-6.46109	1.00492	SV_224	SV_109	0.940403	-7.11924	0.597416	+
61	0.974606	7.94509	SV_95	SV_290	0.927634	-7.51299	0.597416	+
62	0.974606	7.94509	SV_95	SV_192	0.955882	-7.77302	-2.65086	+
63	6.33393	-3.70418	SV_66	SV_46	0.927634	6.91362	-4.43108	+
64	6.33393	-3.70418	SV_66	SV_89	0.927634	-7.25016	0.581205	+
65	6.33393	-3.70418	SV_66	SV_83	-0.985611	-0.101846	6.43342	-
66	6.33393	-3.70418	SV_66	SV_281	0.954864	5.40418	-5.63482	+
67	6.33393	-3.70418	SV_66	SV_260	-0.970588	-8.03793	2.4424	-
68	6.33393	-3.70418	SV_66	SV_122	-0.927634	-0.87276	8.12149	-
69	6.33393	-3.70418	SV_66	SV_116	0.985611	-0.73937	8.27543	+
70	6.33393	-3.70418	SV_66	SV_79	-0.970588	6.23939	1.6739	-
71	6.33393	-3.70418	SV_66	SV_237	0.954864	4.82449	-4.43108	+
72	6.33393	-3.70418	SV_66	SV_268	0.954864	-7.44778	2.71391	+
73	-6.92907	2.64968	SV_7	SV_88	0.927634	-8.12976	2.34769	+
74	-5.87648	4.66015	SV_41	SV_24	0.935484	-2.56361	5.94564	+
75	-5.87648	4.66015	SV_41	SV_52	0.941124	3.26335	-7.82425	+
76	-5.87648	4.66015	SV_41	SV_212	-0.924062	-0.809732	6.79836	-
77	1.07022	7.55098	SV_92	SV_123	0.927634	-1.04123	7.7526	+
78	0.662313	6.6578	SV_43	SV_138	0.927634	-8.34664	1.35739	+
79	-6.32943	1.23297	SV_84	SV_53	0.941124	6.91362	-4.90792	+
80	-2.77618	7.69631	SV_18	SV_192	0.927634	-7.77302	-2.65086	+
81	-2.77618	7.69631	SV_18	SV_167	-0.942857	-3.77202	7.69631	-
82	-0.87276	8.12149	SV_122	SV_116	-0.942857	-0.73937	8.27543	-
83	-0.87276	8.12149	SV_122	SV_79	0.985611	6.23939	1.6739	+
84	3.25259	7.82944	SV_9	SV_302	-0.941124	-0.202769	8.55207	-
85	4.32402	6.75801	SV_34	SV_25	-0.970588	6.70673	-5.33752	-
86	4.32402	6.75801	SV_34	SV_82	0.927634	-5.85415	-5.7596	+
87	4.32402	6.75801	SV_34	SV_128	0.927634	5.86161	3.60741	+
88	6.23939	1.6739	SV_79	SV_237	-0.924062	4.82449	-4.43108	-
89	6.23939	1.6739	SV_79	SV_268	-0.924062	-7.44778	2.71391	-
90	6.70673	-4.00148	SV_13	SV_56	0.927634	-7.88015	0.739655	+
91	6.70673	-4.00148	SV_13	SV_177	-0.927634	-0.927884	6.96429	-
92	6.70673	-4.00148	SV_13	SV_316	0.927634	-4.2759	6.36768	+
93	5.86905	-5.74093	SV_61	SV_83	-0.927634	-0.101846	6.43342	-
94	5.86905	-5.74093	SV_61	SV_50	-0.924062	-8.0853	0.904744	-
95	5.86905	-5.74093	SV_61	SV_232	-0.970588	-8.244	1.11489	-
96	5.86905	-5.74093	SV_61	SV_409	-0.924062	-3.01769	5.70732	-
97	5.86905	-5.74093	SV_61	SV_78	-0.985611	-8.36274	1.87982	-
98	5.86905	-5.74093	SV_61	SV_116	0.927634	-0.73937	8.27543	+
99	-6.5943	2.4424	SV_27	SV_13	-0.942857	6.70673	-4.00148	-
100	-6.5943	2.4424	SV_27	SV_316	-0.985611	-4.2759	6.36768	-
101	-6.5943	2.4424	SV_27	SV_47	-0.941124	5.03138	-4.00148	-
102	-6.24519	1.61761	SV_63	SV_87	-0.941124	-8.3028	1.23297	-
103	-6.24519	1.61761	SV_63	SV_153	-0.942857	2.19192	-6.75282	-
104	-6.64441	0.815873	SV_45	SV_314	0.92	-8.38703	1.61761	+
105	-6.64441	0.815873	SV_45	SV_524	0.92	4.93372	5.21456	+
106	-2.2723	6.36768	SV_69	SV_56	-0.985611	-7.88015	0.739655	-
107	-2.2723	6.36768	SV_69	SV_58	-0.942857	4.93372	4.14313	-
108	-3.01769	5.70732	SV_409	SV_78	0.941124	-8.36274	1.87982	+
109	-4.2759	6.36768	SV_316	SV_47	0.954864	5.03138	-4.00148	+
110	6.33393	-5.63482	SV_31	SV_90	0.942857	-0.490957	6.54768	+
111	-5.85415	-3.61674	SV_44	SV_200	0.927634	1.08337	-7.49999	+
112	4.82449	-4.90792	SV_55	SV_165	-0.924062	-0.39821	8.49468	-
113	-6.38823	1.11489	SV_36	SV_97	-0.940403	4.0102	6.00039	-
114	-8.244	1.11489	SV_232	SV_78	0.927634	-8.36274	1.87982	+
115	-8.244	1.11489	SV_232	SV_58	0.927634	4.93372	4.14313	+
116	3.25259	5.68658	SV_51	SV_67	1	-0.579258	8.40134	+
117	-8.38703	1.61761	SV_314	SV_524	1	4.93372	5.21456	+
118	1.0125	7.14957	SV_42	SV_37	0.941124	-6.26358	-1.92395	+
119	1.0125	7.14957	SV_42	SV_245	0.935484	0.0119449	-8.57142	+
120	1.0125	7.14957	SV_42	SV_225	0.941124	-8.20926	2.24242	+
121	1.0125	7.14957	SV_42	SV_360	1	5.40418	-3.70418	+
122	0.0119449	-6.42856	SV_98	SV_109	-0.937958	-7.11924	0.597416	-
123	0.0119449	-6.42856	SV_98	SV_141	-0.924062	-1.07022	7.55098	-
124	1.08337	-7.49999	SV_200	SV_86	0.985611	-3.24182	-7.83461	+
125	-6.26949	1.87982	SV_68	SV_71	0.942857	-6.25736	1.48625	+
126	-6.26949	1.87982	SV_68	SV_35	0.942857	3.26335	-5.68139	+
127	-6.26949	1.87982	SV_68	SV_72	0.942857	-8.17113	1.00492	+
128	-6.26949	1.87982	SV_68	SV_81	0.942857	-8.37486	1.48625	+
129	-6.26949	1.87982	SV_68	SV_127	0.927634	-0.974606	7.94509	+
130	-6.26949	1.87982	SV_68	SV_144	0.942857	-7.93516	2.5251	+
131	-6.75208	0.739655	SV_48	SV_111	1	-0.301856	6.47197	+
132	-6.75208	0.739655	SV_48	SV_129	0.927634	-6.84327	-2.65086	+
133	-6.75208	0.739655	SV_48	SV_113	1	-3.98459	5.94564	+
134	-6.75208	0.739655	SV_48	SV_165	0.985611	-0.39821	8.49468	+
135	-8.27522	2.12818	SV_199	SV_93	-0.924062	-1.05948	-7.49999	-
136	-8.27522	2.12818	SV_199	SV_40	0.941124	-4.15587	7.35625	+
137	-8.03793	2.4424	SV_260	SV_122	0.985611	-0.87276	8.12149	+
138	-8.03793	2.4424	SV_260	SV_116	-0.985611	-0.73937	8.27543	-
139	-8.03793	2.4424	SV_260	SV_79	1	6.23939	1.6739	+
140	-8.03793	2.4424	SV_260	SV_237	-0.924062	4.82449	-4.43108	-
141	-8.03793	2.4424	SV_260	SV_268	-0.924062	-7.44778	2.71391	-
142	0	8.57143	SV_4	SV_43	0.942857	0.662313	6.6578	+
143	0.202769	8.55207	SV_5	SV_44	0.942857	-5.85415	-3.61674	+
144	0.202769	8.55207	SV_5	SV_32	0.942857	-2.39233	7.35625	+
145	0.202769	8.55207	SV_5	SV_19	-0.942857	4.0102	7.51562	-
146	0.73937	8.27543	SV_30	SV_68	0.942857	-6.26949	1.87982	+
147	0.73937	8.27543	SV_30	SV_35	1	3.26335	-5.68139	+
148	0.73937	8.27543	SV_30	SV_127	0.985611	-0.974606	7.94509	+
149	1.04123	7.7526	SV_62	SV_47	0.935484	5.03138	-4.00148	+
150	-0.301856	6.47197	SV_111	SV_129	0.927634	-6.84327	-2.65086	+
151	-0.301856	6.47197	SV_111	SV_113	1	-3.98459	5.94564	+
152	-0.301856	6.47197	SV_111	SV_165	0.985611	-0.39821	8.49468	+
153	-0.490957	6.54768	SV_90	SV_118	-0.941124	5.03138	-5.33752	-
154	-0.490957	6.54768	SV_90	SV_167	0.942857	-3.77202	7.69631	+
155	-0.927884	6.96429	SV_177	SV_237	0.954864	4.82449	-4.43108	+
156	-0.927884	6.96429	SV_177	SV_268	0.954864	-7.44778	2.71391	+
157	-0.73937	8.27543	SV_116	SV_79	-0.985611	6.23939	1.6739	-
158	-0.73937	8.27543	SV_116	SV_237	0.941124	4.82449	-4.43108	+
159	-0.73937	8.27543	SV_116	SV_268	0.941124	-7.44778	2.71391	+
160	5.86161	5.75027	SV_8	SV_220	0.927634	-6.24926	1.74946	+
161	5.86161	5.75027	SV_8	SV_92	1	1.07022	7.55098	+
162	5.86161	5.75027	SV_8	SV_123	0.927634	-1.04123	7.7526	+
163	7.31082	2.74533	SV_2	SV_65	0.942857	7.31348	-1.66225	+
164	8.38225	1.6739	SV_10	SV_46	-0.942857	6.91362	-4.43108	-
165	8.38225	1.6739	SV_10	SV_128	-0.942857	5.86161	3.60741	-
166	8.38225	1.6739	SV_10	SV_260	0.927634	-8.03793	2.4424	+
167	8.38225	1.6739	SV_10	SV_122	0.942857	-0.87276	8.12149	+
168	8.38225	1.6739	SV_10	SV_79	0.927634	6.23939	1.6739	+
169	5.86905	-3.59807	SV_39	SV_68	0.942857	-6.26949	1.87982	+
170	5.86905	-3.59807	SV_39	SV_71	1	-6.25736	1.48625	+
171	6.91362	-4.43108	SV_46	SV_89	0.942857	-7.25016	0.581205	+
172	6.91362	-4.43108	SV_46	SV_83	-0.942857	-0.101846	6.43342	-
173	6.91362	-4.43108	SV_46	SV_148	-0.927634	-7.98782	0.815873	-
174	6.91362	-4.43108	SV_46	SV_260	-0.985611	-8.03793	2.4424	-
175	6.91362	-4.43108	SV_46	SV_122	-1	-0.87276	8.12149	-
176	6.91362	-4.43108	SV_46	SV_116	0.942857	-0.73937	8.27543	+
177	6.91362	-4.43108	SV_46	SV_79	-0.985611	6.23939	1.6739	-
178	6.70673	-5.33752	SV_25	SV_82	-0.985611	-5.85415	-5.7596	-
179	6.70673	-5.33752	SV_25	SV_128	-0.927634	5.86161	3.60741	-
180	3.26335	-5.68139	SV_35	SV_127	0.985611	-0.974606	7.94509	+
181	4.33478	-6.75282	SV_73	SV_61	0.927634	5.86905	-5.74093	+
182	4.33478	-6.75282	SV_73	SV_83	-0.942857	-0.101846	6.43342	-
183	4.33478	-6.75282	SV_73	SV_148	-0.985611	-7.98782	0.815873	-
184	4.33478	-6.75282	SV_73	SV_50	-0.941124	-8.0853	0.904744	-
185	4.33478	-6.75282	SV_73	SV_281	0.941124	5.40418	-5.63482	+
186	4.33478	-6.75282	SV_73	SV_409	-0.941124	-3.01769	5.70732	-
187	4.33478	-6.75282	SV_73	SV_78	-0.942857	-8.36274	1.87982	-
188	4.33478	-6.75282	SV_73	SV_260	-0.927634	-8.03793	2.4424	-
189	4.33478	-6.75282	SV_73	SV_116	0.942857	-0.73937	8.27543	+
190	4.33478	-6.75282	SV_73	SV_79	-0.927634	6.23939	1.6739	-
191	4.33478	-6.75282	SV_73	SV_237	0.941124	4.82449	-4.43108	+
192	4.33478	-6.75282	SV_73	SV_268	0.941124	-7.44778	2.71391	+
193	0.0119449	-8.57142	SV_245	SV_360	0.935484	5.40418	-3.70418	+
194	-1.05948	-7.49999	SV_93	SV_40	-0.927634	-4.15587	7.35625	-
195	-5.85415	-5.7596	SV_82	SV_128	0.942857	5.86161	3.60741	+
196	-7.30814	-0.61411	SV_57	SV_55	-0.924062	4.82449	-4.90792	-
197	-6.26358	-1.92395	SV_37	SV_225	1	-8.20926	2.24242	+
198	-6.26358	-1.92395	SV_37	SV_93	0.927634	-1.05948	-7.49999	+
199	-6.26358	-1.92395	SV_37	SV_360	0.941124	5.40418	-3.70418	+
200	-7.31611	2.72203	SV_1	SV_9	-0.942857	3.25259	7.82944	-
201	-7.31611	2.72203	SV_1	SV_302	0.941124	-0.202769	8.55207	+
202	-7.05478	2.68967	SV_15	SV_59	1	-6.54692	0.904744	+
203	-7.05478	2.68967	SV_15	SV_43	0.942857	0.662313	6.6578	+
204	-7.05478	2.68967	SV_15	SV_72	0.942857	-8.17113	1.00492	+
205	-7.05478	2.68967	SV_15	SV_81	0.942857	-8.37486	1.48625	+
206	-7.05478	2.68967	SV_15	SV_129	0.927634	-6.84327	-2.65086	+
207	-7.05478	2.68967	SV_15	SV_240	0.927634	-3.53051	5.70732	+
208	-7.05478	2.68967	SV_15	SV_144	0.942857	-7.93516	2.5251	+
209	-6.80923	2.59454	SV_6	SV_38	0.942857	-6.28559	1.35739	+
210	-6.80923	2.59454	SV_6	SV_25	-0.927634	6.70673	-5.33752	-
211	-6.80923	2.59454	SV_6	SV_82	0.942857	-5.85415	-5.7596	+
212	-6.69707	2.5251	SV_16	SV_90	0.942857	-0.490957	6.54768	+
213	-6.69707	2.5251	SV_16	SV_93	0.927634	-1.05948	-7.49999	+
214	-6.35701	2.12818	SV_21	SV_89	0.942857	-7.25016	0.581205	+
215	-6.35701	2.12818	SV_21	SV_100	0.927634	-7.64092	0.629593	+
216	-6.35701	2.12818	SV_21	SV_177	0.927634	-0.927884	6.96429	+
217	-6.30559	2.0067	SV_22	SV_220	0.942857	-6.24926	1.74946	+
218	-6.30559	2.0067	SV_22	SV_123	0.942857	-1.04123	7.7526	+
219	-6.54692	0.904744	SV_59	SV_43	0.942857	0.662313	6.6578	+
220	-6.54692	0.904744	SV_59	SV_72	0.942857	-8.17113	1.00492	+
221	-6.54692	0.904744	SV_59	SV_81	0.942857	-8.37486	1.48625	+
222	-6.54692	0.904744	SV_59	SV_129	0.927634	-6.84327	-2.65086	+
223	-6.54692	0.904744	SV_59	SV_240	0.927634	-3.53051	5.70732	+
224	-6.54692	0.904744	SV_59	SV_144	0.942857	-7.93516	2.5251	+
225	-7.11924	0.597416	SV_109	SV_141	0.985184	-1.07022	7.55098	+
226	-7.25016	0.581205	SV_89	SV_100	0.927634	-7.64092	0.629593	+
227	-7.25016	0.581205	SV_89	SV_260	-0.927634	-8.03793	2.4424	-
228	-7.25016	0.581205	SV_89	SV_122	-0.942857	-0.87276	8.12149	-
229	-7.25016	0.581205	SV_89	SV_79	-0.927634	6.23939	1.6739	-
230	-7.88015	0.739655	SV_56	SV_58	0.927634	4.93372	4.14313	+
231	-7.98782	0.815873	SV_148	SV_50	0.954864	-8.0853	0.904744	+
232	-7.98782	0.815873	SV_148	SV_281	-0.924062	5.40418	-5.63482	-
233	-7.98782	0.815873	SV_148	SV_409	0.954864	-3.01769	5.70732	+
234	-7.98782	0.815873	SV_148	SV_260	0.941176	-8.03793	2.4424	+
235	-7.98782	0.815873	SV_148	SV_122	0.927634	-0.87276	8.12149	+
236	-7.98782	0.815873	SV_148	SV_116	-0.927634	-0.73937	8.27543	-
237	-7.98782	0.815873	SV_148	SV_79	0.941176	6.23939	1.6739	+
238	-7.98782	0.815873	SV_148	SV_237	-0.924062	4.82449	-4.43108	-
239	-7.98782	0.815873	SV_148	SV_268	-0.924062	-7.44778	2.71391	-
240	-8.17113	1.00492	SV_72	SV_81	1	-8.37486	1.48625	+
241	-8.17113	1.00492	SV_72	SV_240	0.985611	-3.53051	5.70732	+
242	-8.17113	1.00492	SV_72	SV_144	1	-7.93516	2.5251	+
243	-3.98459	5.94564	SV_113	SV_165	0.985611	-0.39821	8.49468	+
244	1.06052	7.34752	SV_26	SV_73	-0.942857	4.33478	-6.75282	-
245	1.06052	7.34752	SV_26	SV_148	0.927634	-7.98782	0.815873	+
246	1.06052	7.34752	SV_26	SV_118	-0.941124	5.03138	-5.33752	-
247	0.809732	6.79836	SV_76	SV_50	-0.954864	-8.0853	0.904744	-
248	0.809732	6.79836	SV_76	SV_194	0.970588	6.78949	4.14313	+
249	0.809732	6.79836	SV_76	SV_409	-0.954864	-3.01769	5.70732	-
250	6.78949	4.14313	SV_194	SV_409	-0.924062	-3.01769	5.70732	-
251	-6.24926	1.74946	SV_220	SV_92	0.927634	1.07022	7.55098	+
252	-6.24926	1.74946	SV_220	SV_151	0.985611	-0.662313	6.6578	+
253	-6.24926	1.74946	SV_220	SV_197	-0.927634	-8.38297	1.74946	-
254	-6.24926	1.74946	SV_220	SV_123	1	-1.04123	7.7526	+
255	-8.0853	0.904744	SV_50	SV_194	-0.924062	6.78949	4.14313	-
256	-8.0853	0.904744	SV_50	SV_409	1	-3.01769	5.70732	+
257	-8.0853	0.904744	SV_50	SV_78	0.941124	-8.36274	1.87982	+
258	-8.3028	1.23297	SV_87	SV_153	0.941124	2.19192	-6.75282	+
259	-3.2741	7.81904	SV_17	SV_77	0.970588	-8.32664	2.0067	+
260	-3.2741	7.81904	SV_17	SV_58	-0.927634	4.93372	4.14313	-
261	-2.39233	7.35625	SV_32	SV_19	-1	4.0102	7.51562	-
262	-2.56361	5.94564	SV_24	SV_212	-0.924062	-0.809732	6.79836	-

## Sheet: edge_data_16S_net_Jun
	X2	Y2	OTU_2	OTU_1	weight	X1	Y1	cor
1	0.96355	7.76753	SV_62	SV_63	0.941124	-6.15112	2.45588	+
2	0.96355	7.76753	SV_62	SV_202	0.935484	2.34196	6.14513	+
3	0.96355	7.76753	SV_62	SV_128	0.954864	7.56533	1.4212	+
4	0.96355	7.76753	SV_62	SV_56	0.935484	-7.84591	3.00655	+
5	0.96355	7.76753	SV_62	SV_136	1	-0.762162	8.14739	+
6	0.96355	7.76753	SV_62	SV_116	0.954864	-0.605174	8.29609	+
7	0.96355	7.76753	SV_62	SV_251	0.954864	6.34961	2.94566	+
8	0.96355	7.76753	SV_62	SV_341	0.941124	2.66639	7.77612	+
9	0.998533	7.55414	SV_49	SV_42	-0.927634	0.986827	7.33822	-
10	0.998533	7.55414	SV_49	SV_23	1	-6.32979	1.71166	+
11	0.998533	7.55414	SV_49	SV_26	0.927634	0.108119	6.50586	+
12	0.998533	7.55414	SV_49	SV_209	-0.927634	0.927453	-6.56774	-
13	0.998533	7.55414	SV_49	SV_78	0.927634	-7.72659	3.10846	+
14	0.998533	7.55414	SV_49	SV_141	-0.927634	-0.419889	8.40758	-
15	-0.605174	8.29609	SV_116	SV_251	1	6.34961	2.94566	+
16	-0.605174	8.29609	SV_116	SV_341	0.985611	2.66639	7.77612	+
17	3.75618	6.14513	SV_142	SV_160	0.937958	-7.45706	-1.80138	+
18	2.66639	5.92836	SV_75	SV_90	0.935484	-0.827689	6.93881	+
19	2.66639	5.92836	SV_75	SV_117	0.941124	-0.928977	7.12986	+
20	2.34196	6.14513	SV_202	SV_192	0.941124	-8.40812	-0.492368	+
21	2.34196	6.14513	SV_202	SV_56	1	-7.84591	3.00655	+
22	2.34196	6.14513	SV_202	SV_136	0.935484	-0.762162	8.14739	+
23	7.36519	-3.2431	SV_376	SV_120	-0.941124	7.02569	-1.6786	-
24	7.36519	-3.2431	SV_376	SV_69	0.941124	-4.04581	7.06501	+
25	5.63314	-4.2431	SV_190	SV_156	-0.927634	-3.85271	6.219	-
26	5.63314	-4.2431	SV_190	SV_83	-0.985611	-0.883512	7.96841	-
27	0.704216	-7.83378	SV_53	SV_79	1	7.89346	-1.6786	+
28	0.704216	-7.83378	SV_53	SV_26	0.927634	0.108119	6.50586	+
29	0.704216	-7.83378	SV_53	SV_209	-0.985611	0.927453	-6.56774	-
30	0.704216	-7.83378	SV_53	SV_78	0.985611	-7.72659	3.10846	+
31	0.704216	-7.83378	SV_53	SV_116	-0.927634	-0.605174	8.29609	-
32	0.704216	-7.83378	SV_53	SV_251	-0.927634	6.34961	2.94566	-
33	-6.48721	-2.76378	SV_44	SV_72	0.942857	-7.84591	1.59234	+
34	-6.50601	-0.492368	SV_91	SV_182	-1	0.827689	6.93881	-
35	-6.98237	3.28713	SV_3	SV_37	0.942857	-6.86928	0.00763246	+
36	-6.98237	3.28713	SV_3	SV_96	0.942857	-6.50601	-1.1104	+
37	-6.18775	2.60846	SV_21	SV_91	-1	-6.50601	-0.492368	-
38	-6.18775	2.60846	SV_21	SV_182	1	0.827689	6.93881	+
39	-6.13881	2.29944	SV_38	SV_44	0.927634	-6.48721	-2.76378	+
40	-6.13881	2.29944	SV_38	SV_52	0.985611	-0.680847	-7.83875	+
41	-6.13881	2.29944	SV_38	SV_137	0.955882	-6.86928	-1.6104	+
42	-6.13881	2.29944	SV_38	SV_131	0.985611	-3.07088	5.84249	+
43	-6.13881	2.29944	SV_38	SV_72	0.985611	-7.84591	1.59234	+
44	-6.13881	2.29944	SV_38	SV_470	0.970588	-8.12649	2.45588	+
45	-6.18775	1.99043	SV_45	SV_457	0.92	-0.687699	6.774	+
46	-6.55102	1.49043	SV_27	SV_48	0.927634	-6.82979	1.34839	+
47	-6.55102	1.49043	SV_27	SV_180	0.927634	8.43451	-1.00015	+
48	-6.55102	1.49043	SV_27	SV_72	0.942857	-7.84591	1.59234	+
49	-6.55102	1.49043	SV_27	SV_470	0.927634	-8.12649	2.45588	+
50	-7.5928	1.40844	SV_68	SV_469	0.942857	6.49917	-4.7431	+
51	-7.5928	1.40844	SV_68	SV_194	0.927634	6.69756	1.4212	+
52	-7.5928	1.40844	SV_68	SV_157	-0.927634	5.57145	4.02085	-
53	-8.13881	2.29944	SV_199	SV_396	-0.924062	-3.50476	5.94152	-
54	-7.84591	3.00655	SV_56	SV_136	0.935484	-0.762162	8.14739	+
55	-7.44782	3.2505	SV_268	SV_292	1	2.12519	7.23492	+
56	-7.29524	3.28713	SV_166	SV_93	0.940403	-5.26281	-6.57604	+
57	-3.85271	6.219	SV_156	SV_83	0.941176	-0.883512	7.96841	+
58	0.605174	8.29609	SV_30	SV_82	0.985611	-6.48721	-4.76378	+
59	-0.986827	7.33822	SV_133	SV_81	0.942857	-8.08986	2.60846	+
60	6.69756	1.4212	SV_194	SV_318	0.954864	-4.04581	6.61997	+
61	6.69756	1.4212	SV_194	SV_157	-0.970588	5.57145	4.02085	-
62	6.34961	2.94566	SV_251	SV_341	0.985611	2.66639	7.77612	+
63	0.585433	-7.16013	SV_39	SV_190	-0.927634	5.63314	-4.2431	-
64	0.585433	-7.16013	SV_39	SV_156	1	-3.85271	6.219	+
65	0.585433	-7.16013	SV_39	SV_83	0.941176	-0.883512	7.96841	+
66	-6.82979	3.2505	SV_15	SV_33	0.927634	0.419889	8.40758	+
67	-6.82979	3.2505	SV_15	SV_146	0.927634	3.97295	7.23492	+
68	-6.82979	3.2505	SV_15	SV_63	0.942857	-6.15112	2.45588	+
69	-6.82979	3.2505	SV_15	SV_161	0.985611	-2.637	5.94152	+
70	-6.82979	3.2505	SV_15	SV_222	0.942857	7.36519	-4.2431	+
71	-6.82979	3.2505	SV_15	SV_202	0.941124	2.34196	6.14513	+
72	-6.82979	3.2505	SV_15	SV_100	0.927634	-8.02981	1.84545	+
73	-6.82979	3.2505	SV_15	SV_192	1	-8.40812	-0.492368	+
74	-6.82979	3.2505	SV_15	SV_56	0.941124	-7.84591	3.00655	+
75	-6.82979	3.2505	SV_15	SV_116	0.927634	-0.605174	8.29609	+
76	-6.82979	3.2505	SV_15	SV_251	0.927634	6.34961	2.94566	+
77	-2.28905	7.46598	SV_32	SV_51	0.942857	3.43175	5.92836	+
78	-2.28905	7.46598	SV_32	SV_27	0.942857	-6.55102	1.49043	+
79	-2.28905	7.46598	SV_32	SV_58	0.942857	8.10637	2.09965	+
80	-2.28905	7.46598	SV_32	SV_48	0.985611	-6.82979	1.34839	+
81	-2.28905	7.46598	SV_32	SV_470	0.927634	-8.12649	2.45588	+
82	-2.28905	7.46598	SV_32	SV_94	-0.942857	-0.21497	8.47662	-
83	-2.09595	6.61997	SV_28	SV_73	-0.927634	-2.4129	-7.83875	-
84	4.41612	-6.06201	SV_140	SV_94	-0.941124	-0.21497	8.47662	-
85	0.986827	7.33822	SV_42	SV_23	-0.927634	-6.32979	1.71166	-
86	0.986827	7.33822	SV_42	SV_25	-0.985611	2.43627	-7.83378	-
87	0.986827	7.33822	SV_42	SV_53	-0.985611	0.704216	-7.83378	-
88	0.986827	7.33822	SV_42	SV_79	-0.985611	7.89346	-1.6786	-
89	0.986827	7.33822	SV_42	SV_209	0.970588	0.927453	-6.56774	+
90	0.986827	7.33822	SV_42	SV_78	-0.970588	-7.72659	3.10846	-
91	0.986827	7.33822	SV_42	SV_116	0.941176	-0.605174	8.29609	+
92	0.986827	7.33822	SV_42	SV_251	0.941176	6.34961	2.94566	+
93	0.986827	7.33822	SV_42	SV_341	0.927634	2.66639	7.77612	+
94	-6.55102	3.10846	SV_14	SV_13	0.942857	1.57024	-6.33378	+
95	-6.55102	3.10846	SV_14	SV_49	1	0.998533	7.55414	+
96	-6.55102	3.10846	SV_14	SV_42	-0.927634	0.986827	7.33822	-
97	-6.55102	3.10846	SV_14	SV_23	1	-6.32979	1.71166	+
98	-6.55102	3.10846	SV_14	SV_26	0.927634	0.108119	6.50586	+
99	-6.55102	3.10846	SV_14	SV_209	-0.927634	0.927453	-6.56774	-
100	-6.55102	3.10846	SV_14	SV_78	0.927634	-7.72659	3.10846	+
101	-6.55102	3.10846	SV_14	SV_141	-0.927634	-0.419889	8.40758	-
102	-6.4317	3.00655	SV_6	SV_57	0.971008	-7.45706	0.198615	+
103	-6.4317	3.00655	SV_6	SV_180	0.985611	8.43451	-1.00015	+
104	-6.4317	3.00655	SV_6	SV_72	0.942857	-7.84591	1.59234	+
105	-6.4317	3.00655	SV_6	SV_470	0.927634	-8.12649	2.45588	+
106	-5.58742	5.00307	SV_41	SV_166	0.985611	-7.29524	3.28713	+
107	-5.58742	5.00307	SV_41	SV_93	0.971008	-5.26281	-6.57604	+
108	-2.28905	6.219	SV_183	SV_309	1	-7.5928	3.19045	+
109	0	8.5	SV_4	SV_35	0.942857	-1.54687	-6.33875	+
110	0	8.5	SV_4	SV_37	0.942857	-6.86928	0.00763246	+
111	0	8.5	SV_4	SV_96	0.942857	-6.50601	-1.1104	+
112	0	8.5	SV_4	SV_379	-0.971008	-0.515554	6.64314	-
113	0	8.5	SV_4	SV_336	-0.927634	-8.04485	-1.6104	-
114	0	8.5	SV_4	SV_217	-0.927634	2.34196	7.55935	-
115	5.63314	-3.2431	SV_518	SV_116	0.941176	-0.605174	8.29609	+
116	5.63314	-3.2431	SV_518	SV_268	0.941176	-7.44782	3.2505	+
117	5.63314	-3.2431	SV_518	SV_292	0.941176	2.12519	7.23492	+
118	5.63314	-3.2431	SV_518	SV_251	0.941176	6.34961	2.94566	+
119	5.63314	-3.2431	SV_518	SV_341	0.927634	2.66639	7.77612	+
120	5.63314	-3.2431	SV_518	SV_140	0.954864	4.41612	-6.06201	+
121	1.91226	-8.27347	SV_31	SV_50	0.970588	-6.4317	1.59234	+
122	1.91226	-8.27347	SV_31	SV_469	-0.927634	6.49917	-4.7431	-
123	1.91226	-8.27347	SV_31	SV_194	-0.970588	6.69756	1.4212	-
124	1.91226	-8.27347	SV_31	SV_157	0.941176	5.57145	4.02085	+
125	-8.40812	-1.1104	SV_135	SV_69	0.935484	-4.04581	7.06501	+
126	-8.40812	-1.1104	SV_135	SV_217	-0.924062	2.34196	7.55935	-
127	0.419889	8.40758	SV_33	SV_146	1	3.97295	7.23492	+
128	0.419889	8.40758	SV_33	SV_62	0.954864	0.96355	7.76753	+
129	0.419889	8.40758	SV_33	SV_63	0.985611	-6.15112	2.45588	+
130	0.419889	8.40758	SV_33	SV_42	0.941176	0.986827	7.33822	+
131	0.419889	8.40758	SV_33	SV_25	-0.927634	2.43627	-7.83378	-
132	0.419889	8.40758	SV_33	SV_53	-0.927634	0.704216	-7.83378	-
133	0.419889	8.40758	SV_33	SV_79	-0.927634	7.89346	-1.6786	-
134	0.419889	8.40758	SV_33	SV_161	0.941176	-2.637	5.94152	+
135	0.419889	8.40758	SV_33	SV_128	0.955882	7.56533	1.4212	+
136	0.419889	8.40758	SV_33	SV_518	0.941176	5.63314	-3.2431	+
137	0.419889	8.40758	SV_33	SV_192	0.927634	-8.40812	-0.492368	+
138	0.419889	8.40758	SV_33	SV_136	0.954864	-0.762162	8.14739	+
139	0.419889	8.40758	SV_33	SV_116	1	-0.605174	8.29609	+
140	0.419889	8.40758	SV_33	SV_251	1	6.34961	2.94566	+
141	0.419889	8.40758	SV_33	SV_341	0.985611	2.66639	7.77612	+
142	1.57024	-6.33378	SV_13	SV_33	-0.927634	0.419889	8.40758	-
143	1.57024	-6.33378	SV_13	SV_146	-0.927634	3.97295	7.23492	-
144	1.57024	-6.33378	SV_13	SV_49	0.942857	0.998533	7.55414	+
145	1.57024	-6.33378	SV_13	SV_42	-0.985611	0.986827	7.33822	-
146	1.57024	-6.33378	SV_13	SV_23	0.942857	-6.32979	1.71166	+
147	1.57024	-6.33378	SV_13	SV_25	0.942857	2.43627	-7.83378	+
148	1.57024	-6.33378	SV_13	SV_53	0.942857	0.704216	-7.83378	+
149	1.57024	-6.33378	SV_13	SV_79	0.942857	7.89346	-1.6786	+
150	1.57024	-6.33378	SV_13	SV_128	-0.927634	7.56533	1.4212	-
151	1.57024	-6.33378	SV_13	SV_209	-0.927634	0.927453	-6.56774	-
152	1.57024	-6.33378	SV_13	SV_78	0.927634	-7.72659	3.10846	+
153	1.57024	-6.33378	SV_13	SV_116	-0.927634	-0.605174	8.29609	-
154	1.57024	-6.33378	SV_13	SV_251	-0.927634	6.34961	2.94566	-
155	1.57024	-6.33378	SV_13	SV_341	-0.942857	2.66639	7.77612	-
156	-6.50601	-1.1104	SV_96	SV_190	-0.942857	5.63314	-4.2431	-
157	-6.86928	-1.6104	SV_137	SV_131	0.985611	-3.07088	5.84249	+
158	-6.86928	-1.6104	SV_137	SV_133	0.927634	-0.986827	7.33822	+
159	-7.13881	3.29944	SV_1	SV_9	-0.942857	3.04907	7.85224	-
160	-6.32979	1.71166	SV_23	SV_26	0.927634	0.108119	6.50586	+
161	-6.32979	1.71166	SV_23	SV_209	-0.927634	0.927453	-6.56774	-
162	-6.32979	1.71166	SV_23	SV_78	0.927634	-7.72659	3.10846	+
163	-6.32979	1.71166	SV_23	SV_141	-0.927634	-0.419889	8.40758	-
164	0.108119	6.50586	SV_26	SV_122	0.970588	-0.108119	6.50586	+
165	0.108119	6.50586	SV_26	SV_209	-0.970588	0.927453	-6.56774	-
166	0.108119	6.50586	SV_26	SV_78	0.970588	-7.72659	3.10846	+
167	0.108119	6.50586	SV_26	SV_141	-0.970588	-0.419889	8.40758	-
168	7.56533	1.4212	SV_128	SV_136	0.954864	-0.762162	8.14739	+
169	7.56533	1.4212	SV_128	SV_116	0.955882	-0.605174	8.29609	+
170	7.56533	1.4212	SV_128	SV_251	0.955882	6.34961	2.94566	+
171	7.56533	1.4212	SV_128	SV_341	0.985611	2.66639	7.77612	+
172	0.927453	-6.56774	SV_209	SV_78	-1	-7.72659	3.10846	-
173	-6.98237	1.31176	SV_59	SV_150	-0.985611	-8.12649	2.14301	-
174	4.04907	6.85224	SV_97	SV_44	-0.927634	-6.48721	-2.76378	-
175	-1.54687	-6.33875	SV_35	SV_36	0.927634	-6.68482	1.40844	+
176	-1.54687	-6.33875	SV_35	SV_39	0.985611	0.585433	-7.16013	+
177	-1.54687	-6.33875	SV_35	SV_190	-0.942857	5.63314	-4.2431	-
178	-1.54687	-6.33875	SV_35	SV_156	0.985611	-3.85271	6.219	+
179	-1.54687	-6.33875	SV_35	SV_83	0.927634	-0.883512	7.96841	+
180	-3.53076	-6.57604	SV_98	SV_426	0.941176	-7.94782	2.88723	+
181	3.43175	5.92836	SV_51	SV_180	0.927634	8.43451	-1.00015	+
182	3.43175	5.92836	SV_51	SV_140	0.941124	4.41612	-6.06201	+
183	3.43175	5.92836	SV_51	SV_94	-1	-0.21497	8.47662	-
184	-6.48721	-4.76378	SV_82	SV_166	0.927634	-7.29524	3.28713	+
185	7.36519	-4.2431	SV_222	SV_192	0.942857	-8.40812	-0.492368	+
186	-7.45706	0.198615	SV_57	SV_43	0.925476	0.883512	7.96841	+
187	-7.45706	0.198615	SV_57	SV_51	0.971008	3.43175	5.92836	+
188	-7.45706	0.198615	SV_57	SV_180	0.985184	8.43451	-1.00015	+
189	-7.45706	0.198615	SV_57	SV_470	0.925476	-8.12649	2.45588	+
190	-7.45706	0.198615	SV_57	SV_94	-0.971008	-0.21497	8.47662	-
191	-6.32979	2.88723	SV_22	SV_120	0.941124	7.02569	-1.6786	+
192	-6.15112	2.45588	SV_63	SV_42	0.927634	0.986827	7.33822	+
193	-6.15112	2.45588	SV_63	SV_25	-0.942857	2.43627	-7.83378	-
194	-6.15112	2.45588	SV_63	SV_53	-0.942857	0.704216	-7.83378	-
195	-6.15112	2.45588	SV_63	SV_79	-0.942857	7.89346	-1.6786	-
196	-6.15112	2.45588	SV_63	SV_161	0.927634	-2.637	5.94152	+
197	-6.15112	2.45588	SV_63	SV_518	0.927634	5.63314	-3.2431	+
198	-6.15112	2.45588	SV_63	SV_192	0.942857	-8.40812	-0.492368	+
199	-6.15112	2.45588	SV_63	SV_136	0.941124	-0.762162	8.14739	+
200	-6.15112	2.45588	SV_63	SV_116	0.985611	-0.605174	8.29609	+
201	-6.15112	2.45588	SV_63	SV_251	0.985611	6.34961	2.94566	+
202	-6.15112	2.45588	SV_63	SV_341	0.942857	2.66639	7.77612	+
203	-6.15112	2.14301	SV_11	SV_31	-0.941176	1.91226	-8.27347	-
204	-6.15112	2.14301	SV_11	SV_50	-0.970588	-6.4317	1.59234	-
205	-6.15112	2.14301	SV_11	SV_68	0.927634	-7.5928	1.40844	+
206	-6.15112	2.14301	SV_11	SV_469	0.985611	6.49917	-4.7431	+
207	0.21497	8.47662	SV_5	SV_97	-0.927634	4.04907	6.85224	-
208	0.21497	8.47662	SV_5	SV_44	0.942857	-6.48721	-2.76378	+
209	0.21497	8.47662	SV_5	SV_172	0.942857	3.04907	5.85224	+
210	0.762162	8.14739	SV_12	SV_206	0.971008	2.04907	6.85224	+
211	0.883512	7.96841	SV_43	SV_32	0.985611	-2.28905	7.46598	+
212	0.883512	7.96841	SV_43	SV_51	0.927634	3.43175	5.92836	+
213	0.883512	7.96841	SV_43	SV_27	0.927634	-6.55102	1.49043	+
214	0.883512	7.96841	SV_43	SV_48	0.955882	-6.82979	1.34839	+
215	0.883512	7.96841	SV_43	SV_72	0.927634	-7.84591	1.59234	+
216	0.883512	7.96841	SV_43	SV_470	0.970588	-8.12649	2.45588	+
217	0.883512	7.96841	SV_43	SV_94	-0.927634	-0.21497	8.47662	-
218	0.928977	7.12986	SV_20	SV_67	0.985611	0.319302	6.55235	+
219	-0.515554	6.64314	SV_379	SV_336	0.925476	-8.04485	-1.6104	+
220	-0.515554	6.64314	SV_379	SV_217	0.925476	2.34196	7.55935	+
221	-0.762162	8.14739	SV_136	SV_116	0.954864	-0.605174	8.29609	+
222	-0.762162	8.14739	SV_136	SV_251	0.954864	6.34961	2.94566	+
223	-0.762162	8.14739	SV_136	SV_341	0.941124	2.66639	7.77612	+
224	3.04907	7.85224	SV_9	SV_10	-0.942857	8.24141	-0.154138	-
225	5.57145	6.02085	SV_85	SV_336	-0.985611	-8.04485	-1.6104	-
226	5.57145	6.02085	SV_85	SV_135	0.941124	-8.40812	-1.1104	+
227	5.57145	6.02085	SV_85	SV_217	-0.927634	2.34196	7.55935	-
228	7.91328	2.94566	SV_29	SV_396	-0.941124	-3.50476	5.94152	-
229	8.43451	-1.00015	SV_180	SV_72	0.927634	-7.84591	1.59234	+
230	8.43451	-1.00015	SV_180	SV_94	-0.927634	-0.21497	8.47662	-
231	7.89346	-1.6786	SV_79	SV_26	0.927634	0.108119	6.50586	+
232	7.89346	-1.6786	SV_79	SV_209	-0.985611	0.927453	-6.56774	-
233	7.89346	-1.6786	SV_79	SV_78	0.985611	-7.72659	3.10846	+
234	7.89346	-1.6786	SV_79	SV_116	-0.927634	-0.605174	8.29609	-
235	7.89346	-1.6786	SV_79	SV_251	-0.927634	6.34961	2.94566	-
236	6.49917	-2.7431	SV_65	SV_15	0.942857	-6.82979	3.2505	+
237	6.49917	-2.7431	SV_65	SV_33	0.985611	0.419889	8.40758	+
238	6.49917	-2.7431	SV_65	SV_146	0.985611	3.97295	7.23492	+
239	6.49917	-2.7431	SV_65	SV_62	0.941124	0.96355	7.76753	+
240	6.49917	-2.7431	SV_65	SV_63	1	-6.15112	2.45588	+
241	6.49917	-2.7431	SV_65	SV_42	0.927634	0.986827	7.33822	+
242	6.49917	-2.7431	SV_65	SV_25	-0.942857	2.43627	-7.83378	-
243	6.49917	-2.7431	SV_65	SV_53	-0.942857	0.704216	-7.83378	-
244	6.49917	-2.7431	SV_65	SV_79	-0.942857	7.89346	-1.6786	-
245	6.49917	-2.7431	SV_65	SV_161	0.927634	-2.637	5.94152	+
246	6.49917	-2.7431	SV_65	SV_518	0.927634	5.63314	-3.2431	+
247	6.49917	-2.7431	SV_65	SV_192	0.942857	-8.40812	-0.492368	+
248	6.49917	-2.7431	SV_65	SV_136	0.941124	-0.762162	8.14739	+
249	6.49917	-2.7431	SV_65	SV_116	0.985611	-0.605174	8.29609	+
250	6.49917	-2.7431	SV_65	SV_251	0.985611	6.34961	2.94566	+
251	6.49917	-2.7431	SV_65	SV_341	0.942857	2.66639	7.77612	+
252	6.49917	-4.7431	SV_469	SV_194	0.927634	6.69756	1.4212	+
253	2.21303	-6.56774	SV_46	SV_38	0.927634	-6.13881	2.29944	+
254	2.21303	-6.56774	SV_46	SV_52	0.942857	-0.680847	-7.83875	+
255	2.21303	-6.56774	SV_46	SV_137	0.927634	-6.86928	-1.6104	+
256	2.21303	-6.56774	SV_46	SV_131	0.942857	-3.07088	5.84249	+
257	2.21303	-6.56774	SV_46	SV_470	0.927634	-8.12649	2.45588	+
258	2.55505	-7.16013	SV_66	SV_161	0.927634	-2.637	5.94152	+
259	2.55505	-7.16013	SV_66	SV_222	0.942857	7.36519	-4.2431	+
260	2.55505	-7.16013	SV_66	SV_189	0.942857	-0.96355	7.76753	+
261	-0.680847	-7.83875	SV_52	SV_137	0.985611	-6.86928	-1.6104	+
262	-0.680847	-7.83875	SV_52	SV_131	1	-3.07088	5.84249	+
263	-0.680847	-7.83875	SV_52	SV_72	0.942857	-7.84591	1.59234	+
264	-0.680847	-7.83875	SV_52	SV_470	0.927634	-8.12649	2.45588	+
265	-4.39678	-5.07604	SV_70	SV_183	-0.941124	-2.28905	6.219	-
266	-4.39678	-5.07604	SV_70	SV_122	0.927634	-0.108119	6.50586	+
267	-4.39678	-5.07604	SV_70	SV_309	-0.941124	-7.5928	3.19045	-
268	-4.39678	-5.07604	SV_70	SV_268	-0.927634	-7.44782	3.2505	-
269	-4.39678	-5.07604	SV_70	SV_292	-0.927634	2.12519	7.23492	-
270	-6.86928	0.00763246	SV_37	SV_96	1	-6.50601	-1.1104	+
271	-6.86928	0.00763246	SV_37	SV_190	-0.942857	5.63314	-4.2431	-
272	-8.40812	-0.492368	SV_192	SV_56	0.941124	-7.84591	3.00655	+
273	-8.40812	-0.492368	SV_192	SV_116	0.927634	-0.605174	8.29609	+
274	-8.40812	-0.492368	SV_192	SV_251	0.927634	6.34961	2.94566	+
275	-6.68482	3.19045	SV_7	SV_16	0.941176	-6.2478	2.75343	+
276	-6.68482	3.19045	SV_7	SV_36	0.970588	-6.68482	1.40844	+
277	-6.68482	3.19045	SV_7	SV_190	-0.985611	5.63314	-4.2431	-
278	-6.68482	3.19045	SV_7	SV_83	0.970588	-0.883512	7.96841	+
279	-6.2478	2.75343	SV_16	SV_122	0.955882	-0.108119	6.50586	+
280	-6.2478	2.75343	SV_16	SV_190	-0.927634	5.63314	-4.2431	-
281	-6.2478	1.84545	SV_54	SV_66	1	2.55505	-7.16013	+
282	-6.2478	1.84545	SV_54	SV_161	0.927634	-2.637	5.94152	+
283	-6.2478	1.84545	SV_54	SV_222	0.942857	7.36519	-4.2431	+
284	-6.2478	1.84545	SV_54	SV_189	0.942857	-0.96355	7.76753	+
285	-6.4317	1.59234	SV_50	SV_68	-0.927634	-7.5928	1.40844	-
286	-6.4317	1.59234	SV_50	SV_469	-0.985611	6.49917	-4.7431	-
287	-6.4317	1.59234	SV_50	SV_194	-0.970588	6.69756	1.4212	-
288	-6.4317	1.59234	SV_50	SV_318	-0.924062	-4.04581	6.61997	-
289	-6.68482	1.40844	SV_36	SV_39	0.941176	0.585433	-7.16013	+
290	-6.68482	1.40844	SV_36	SV_190	-0.985611	5.63314	-4.2431	-
291	-6.68482	1.40844	SV_36	SV_156	0.941176	-3.85271	6.219	+
292	-6.68482	1.40844	SV_36	SV_83	1	-0.883512	7.96841	+
293	-7.44782	1.34839	SV_71	SV_104	-1	6.67775	-0.154138	-
294	-7.84591	1.59234	SV_72	SV_470	0.985611	-8.12649	2.45588	+
295	-2.09595	7.06501	SV_40	SV_71	0.942857	-7.44782	1.34839	+
296	-2.09595	7.06501	SV_40	SV_194	0.927634	6.69756	1.4212	+
297	-2.09595	7.06501	SV_40	SV_104	-0.942857	6.67775	-0.154138	-
298	3.43175	7.77612	SV_34	SV_97	-0.927634	4.04907	6.85224	-
299	3.43175	7.77612	SV_34	SV_50	-0.927634	-6.4317	1.59234	-
300	3.43175	7.77612	SV_34	SV_318	0.941124	-4.04581	6.61997	+
301	-0.108119	6.50586	SV_122	SV_209	-0.955882	0.927453	-6.56774	-
302	-0.108119	6.50586	SV_122	SV_78	0.955882	-7.72659	3.10846	+
303	3.75618	7.55935	SV_19	SV_12	0.942857	0.762162	8.14739	+
304	3.75618	7.55935	SV_19	SV_206	0.971008	2.04907	6.85224	+
305	3.97295	7.23492	SV_146	SV_62	0.954864	0.96355	7.76753	+
306	3.97295	7.23492	SV_146	SV_63	0.985611	-6.15112	2.45588	+
307	3.97295	7.23492	SV_146	SV_42	0.941176	0.986827	7.33822	+
308	3.97295	7.23492	SV_146	SV_25	-0.927634	2.43627	-7.83378	-
309	3.97295	7.23492	SV_146	SV_53	-0.927634	0.704216	-7.83378	-
310	3.97295	7.23492	SV_146	SV_79	-0.927634	7.89346	-1.6786	-
311	3.97295	7.23492	SV_146	SV_161	0.941176	-2.637	5.94152	+
312	3.97295	7.23492	SV_146	SV_128	0.955882	7.56533	1.4212	+
313	3.97295	7.23492	SV_146	SV_518	0.941176	5.63314	-3.2431	+
314	3.97295	7.23492	SV_146	SV_192	0.927634	-8.40812	-0.492368	+
315	3.97295	7.23492	SV_146	SV_136	0.954864	-0.762162	8.14739	+
316	3.97295	7.23492	SV_146	SV_116	1	-0.605174	8.29609	+
317	3.97295	7.23492	SV_146	SV_251	1	6.34961	2.94566	+
318	3.97295	7.23492	SV_146	SV_341	0.985611	2.66639	7.77612	+
319	8.10637	2.09965	SV_58	SV_48	0.927634	-6.82979	1.34839	+
320	8.10637	2.09965	SV_58	SV_161	0.927634	-2.637	5.94152	+
321	8.10637	2.09965	SV_58	SV_100	0.985611	-8.02981	1.84545	+
322	8.10637	2.09965	SV_58	SV_518	0.927634	5.63314	-3.2431	+
323	2.43627	-7.83378	SV_25	SV_53	1	0.704216	-7.83378	+
324	2.43627	-7.83378	SV_25	SV_79	1	7.89346	-1.6786	+
325	2.43627	-7.83378	SV_25	SV_26	0.927634	0.108119	6.50586	+
326	2.43627	-7.83378	SV_25	SV_209	-0.985611	0.927453	-6.56774	-
327	2.43627	-7.83378	SV_25	SV_78	0.985611	-7.72659	3.10846	+
328	2.43627	-7.83378	SV_25	SV_116	-0.927634	-0.605174	8.29609	-
329	2.43627	-7.83378	SV_25	SV_251	-0.927634	6.34961	2.94566	-
330	-8.04485	-1.6104	SV_336	SV_135	-0.954864	-8.40812	-1.1104	-
331	-8.04485	-1.6104	SV_336	SV_217	0.970588	2.34196	7.55935	+
332	-7.29524	1.31176	SV_110	SV_117	0.942857	-0.928977	7.12986	+
333	-8.02981	1.84545	SV_100	SV_518	0.941176	5.63314	-3.2431	+
334	-8.02981	1.84545	SV_100	SV_192	0.927634	-8.40812	-0.492368	+
335	-2.637	5.94152	SV_161	SV_222	0.927634	7.36519	-4.2431	+
336	-2.637	5.94152	SV_161	SV_202	0.954864	2.34196	6.14513	+
337	-2.637	5.94152	SV_161	SV_100	0.941176	-8.02981	1.84545	+
338	-2.637	5.94152	SV_161	SV_192	0.985611	-8.40812	-0.492368	+
339	-2.637	5.94152	SV_161	SV_56	0.954864	-7.84591	3.00655	+
340	-2.637	5.94152	SV_161	SV_116	0.941176	-0.605174	8.29609	+
341	-2.637	5.94152	SV_161	SV_251	0.941176	6.34961	2.94566	+
342	-2.637	5.94152	SV_161	SV_341	0.927634	2.66639	7.77612	+
343	-3.07088	5.84249	SV_131	SV_72	0.942857	-7.84591	1.59234	+
344	-3.07088	5.84249	SV_131	SV_470	0.927634	-8.12649	2.45588	+

## Sheet: edge_data_16S_net_Aug
	X2	Y2	OTU_2	OTU_1	weight	X1	Y1	cor
1	0.690079	8.22373	SV_43	SV_11	0.942857	-6.16388	2.07692	+
2	0.690079	8.22373	SV_43	SV_40	0.942857	-3.65867	6.03347	+
3	0.690079	8.22373	SV_43	SV_120	0.942857	7.8016	-1.71732	+
4	0.690079	8.22373	SV_43	SV_104	0.942857	7.11756	-1.71732	+
5	0.690079	8.22373	SV_43	SV_257	0.985611	6.69756	1.4212	+
6	0.690079	8.22373	SV_43	SV_261	-0.927634	6.15652	2.09965	-
7	0.971812	7.73576	SV_30	SV_25	0.927634	5.34	-5.67932	+
8	0.971812	7.73576	SV_30	SV_256	-0.927634	-0.458227	6.61116	-
9	0.971812	7.73576	SV_30	SV_197	0.942857	-8.13601	2.37417	+
10	0.971812	7.73576	SV_30	SV_157	0.92582	5.57145	4.02085	+
11	0.618159	6.71395	SV_76	SV_61	0.985611	4.7988	-6.98589	+
12	0.618159	6.71395	SV_76	SV_366	1	-4.39678	-5.07604	+
13	0.618159	6.71395	SV_76	SV_263	0.955882	0.982456	-8.1428	+
14	0.095056	6.50453	SV_83	SV_26	0.985611	-0.095056	6.50453	+
15	0.095056	6.50453	SV_83	SV_60	0.971008	6.59355	-1.27763	+
16	0.095056	6.50453	SV_83	SV_211	0.927634	-2.54687	-7.33875	+
17	0.095056	6.50453	SV_83	SV_158	0.927634	-0.690079	8.22373	+
18	0.095056	6.50453	SV_83	SV_114	0.985611	6.81679	-0.011583	+
19	-0.945001	7.17293	SV_204	SV_248	0.927634	-0.971812	7.73576	+
20	-0.945001	7.17293	SV_204	SV_230	0.985611	6.34961	2.94566	+
21	3.9151	7.35224	SV_9	SV_218	-0.941124	-8.06968	1.9341	-
22	8.44439	-0.603979	SV_79	SV_139	0.927634	-7.57269	1.39847	+
23	8.44439	-0.603979	SV_79	SV_256	-0.985611	-0.458227	6.61116	-
24	6.47477	-0.603979	SV_180	SV_253	0.970588	-0.189251	8.48193	+
25	5.34	-5.67932	SV_25	SV_98	0.985611	-0.546873	-7.33875	+
26	5.34	-5.67932	SV_25	SV_197	0.927634	-8.13601	2.37417	+
27	5.34	-5.67932	SV_25	SV_248	0.927634	-0.971812	7.73576	+
28	5.34	-5.67932	SV_25	SV_375	0.927634	-7.43356	3.25502	+
29	5.41612	-6.06201	SV_39	SV_273	-0.942857	3.49224	-6.44469	-
30	5.12322	-6.76911	SV_66	SV_76	0.927634	0.618159	6.71395	+
31	5.12322	-6.76911	SV_66	SV_61	0.942857	4.7988	-6.98589	+
32	5.12322	-6.76911	SV_66	SV_366	0.927634	-4.39678	-5.07604	+
33	5.12322	-6.76911	SV_66	SV_263	0.927634	0.982456	-8.1428	+
34	4.7988	-6.98589	SV_61	SV_366	0.985611	-4.39678	-5.07604	+
35	4.7988	-6.98589	SV_61	SV_263	0.985611	0.982456	-8.1428	+
36	4.41612	-7.06201	SV_53	SV_364	0.970588	2.18304	6.35224	+
37	-7.45706	0.198615	SV_37	SV_83	0.942857	0.095056	6.50453	+
38	-7.45706	0.198615	SV_37	SV_221	0.942857	-8.40812	-0.492368	+
39	-7.45706	0.198615	SV_37	SV_114	0.985611	6.81679	-0.011583	+
40	-7.13881	3.29944	SV_3	SV_38	0.942857	-6.45863	3.0325	+
41	-7.13881	3.29944	SV_3	SV_12	1	0.371662	8.42837	+
42	-7.13881	3.29944	SV_3	SV_20	0.942857	0.814576	8.08006	+
43	-7.13881	3.29944	SV_3	SV_36	0.985611	-6.1416	2.22471	+
44	-7.13881	3.29944	SV_3	SV_48	0.942857	-6.35698	1.67595	+
45	-6.45863	3.0325	SV_38	SV_12	0.942857	0.371662	8.42837	+
46	-6.45863	3.0325	SV_38	SV_36	0.927634	-6.1416	2.22471	+
47	-6.45863	3.0325	SV_38	SV_32	0.942857	-2.11982	6.53347	+
48	-6.45863	3.0325	SV_38	SV_48	1	-6.35698	1.67595	+
49	-6.45863	3.0325	SV_38	SV_243	0.927634	-0.989821	7.35769	+
50	-6.45863	3.0325	SV_38	SV_221	0.942857	-8.40812	-0.492368	+
51	-6.27278	2.79944	SV_21	SV_143	-0.942857	5.34	-6.44469	-
52	-6.27278	2.79944	SV_21	SV_9	0.941124	3.9151	7.35224	+
53	-6.27278	2.79944	SV_21	SV_218	-1	-8.06968	1.9341	-
54	-6.1416	2.22471	SV_36	SV_32	0.927634	-2.11982	6.53347	+
55	-6.1416	2.22471	SV_36	SV_48	0.927634	-6.35698	1.67595	+
56	-6.1416	2.22471	SV_36	SV_103	0.924062	-0.998867	7.54758	+
57	-6.16388	2.07692	SV_11	SV_107	0.942857	8.3256	-1.27763	+
58	-6.16388	2.07692	SV_11	SV_204	0.927634	-0.945001	7.17293	+
59	-6.16388	2.07692	SV_11	SV_257	0.927634	6.69756	1.4212	+
60	-6.16388	2.07692	SV_11	SV_267	0.927634	-0.814576	8.08006	+
61	-6.16388	2.07692	SV_11	SV_230	0.942857	6.34961	2.94566	+
62	-6.84405	1.34387	SV_100	SV_198	-0.942857	-3.65867	7.65151	-
63	-8.00483	1.79944	SV_71	SV_307	0.942857	-8.40812	-1.1104	+
64	-2.11982	7.15151	SV_28	SV_32	0.942857	-2.11982	6.53347	+
65	-2.11982	7.15151	SV_28	SV_89	0.942857	-6.27278	1.79944	+
66	-2.11982	7.15151	SV_28	SV_160	0.942857	-7.45706	-1.80138	+
67	-2.11982	7.15151	SV_28	SV_243	0.985611	-0.989821	7.35769	+
68	-2.11982	7.15151	SV_28	SV_103	0.941124	-0.998867	7.54758	+
69	-2.11982	6.53347	SV_32	SV_48	0.942857	-6.35698	1.67595	+
70	-2.11982	6.53347	SV_32	SV_22	0.942857	-6.57549	1.4732	+
71	-2.11982	6.53347	SV_32	SV_243	0.985611	-0.989821	7.35769	+
72	-2.11982	6.53347	SV_32	SV_103	0.941124	-0.998867	7.54758	+
73	-2.11982	6.53347	SV_32	SV_86	0.942857	-3.53076	-6.57604	+
74	-3.65867	7.65151	SV_198	SV_209	-0.942857	4.03343	-5.13813	-
75	-3.65867	7.65151	SV_198	SV_115	0.927634	-7.28785	3.28827	+
76	-4.39678	-5.07604	SV_366	SV_263	0.955882	0.982456	-8.1428	+
77	-6.98976	3.28827	SV_1	SV_63	0.927634	-6.1416	2.37417	+
78	0.989821	7.35769	SV_49	SV_162	0.942857	-6.86928	-1.6104	+
79	0.989821	7.35769	SV_49	SV_78	0.985611	-7.28785	1.31061	+
80	0.989821	7.35769	SV_49	SV_307	0.942857	-8.40812	-1.1104	+
81	0.989821	7.35769	SV_49	SV_211	0.927634	-2.54687	-7.33875	+
82	0.989821	7.35769	SV_49	SV_158	0.927634	-0.690079	8.22373	+
83	-0.095056	6.50453	SV_26	SV_162	0.927634	-6.86928	-1.6104	+
84	-0.095056	6.50453	SV_26	SV_307	0.927634	-8.40812	-1.1104	+
85	-0.095056	6.50453	SV_26	SV_60	0.940403	6.59355	-1.27763	+
86	-0.095056	6.50453	SV_26	SV_211	0.970588	-2.54687	-7.33875	+
87	-0.095056	6.50453	SV_26	SV_114	0.955882	6.81679	-0.011583	+
88	-8.04485	-1.6104	SV_135	SV_198	-0.927634	-3.65867	7.65151	-
89	-8.04485	-1.6104	SV_135	SV_80	-0.924062	-7.70213	3.12568	-
90	-6.57549	1.4732	SV_22	SV_27	0.942857	-7.13881	1.29944	+
91	-6.57549	1.4732	SV_22	SV_160	0.942857	-7.45706	-1.80138	+
92	-6.57549	1.4732	SV_22	SV_243	0.927634	-0.989821	7.35769	+
93	-6.57549	1.4732	SV_22	SV_86	1	-3.53076	-6.57604	+
94	-7.13881	1.29944	SV_27	SV_156	0.942857	-4.02194	7.15151	+
95	-7.13881	1.29944	SV_27	SV_86	0.942857	-3.53076	-6.57604	+
96	-4.02194	7.15151	SV_156	SV_88	0.941124	-7.57269	3.20041	+
97	0.814576	8.08006	SV_20	SV_98	0.942857	-0.546873	-7.33875	+
98	0.814576	8.08006	SV_20	SV_92	0.927634	-0.75575	6.84514	+
99	0.814576	8.08006	SV_20	SV_452	0.927634	0.619184	-7.02476	+
100	-0.458227	6.61116	SV_256	SV_45	-0.924062	-7.92064	1.67595	-
101	-0.458227	6.61116	SV_256	SV_80	-0.924062	-7.70213	3.12568	-
102	7.8016	-1.71732	SV_120	SV_104	1	7.11756	-1.71732	+
103	7.8016	-1.71732	SV_120	SV_257	0.985611	6.69756	1.4212	+
104	7.8016	-1.71732	SV_120	SV_261	-0.985611	6.15652	2.09965	-
105	7.8016	-1.71732	SV_120	SV_253	0.927634	-0.189251	8.48193	+
106	5.34	-6.44469	SV_143	SV_330	-0.942857	-0.618159	6.71395	-
107	5.34	-6.44469	SV_143	SV_218	0.942857	-8.06968	1.9341	+
108	-6.1416	2.37417	SV_63	SV_128	0.942857	7.56533	1.4212	+
109	-8.11373	2.07692	SV_54	SV_157	-0.939336	5.57145	4.02085	-
110	-5.58742	5.00307	SV_41	SV_49	0.942857	0.989821	7.35769	+
111	-5.58742	5.00307	SV_41	SV_158	0.985611	-0.690079	8.22373	+
112	-5.58742	5.00307	SV_41	SV_552	0.927634	-8.04485	0.00763246	+
113	-3.07088	7.84249	SV_113	SV_66	0.942857	5.12322	-6.76911	+
114	-6.27278	1.79944	SV_89	SV_243	0.927634	-0.989821	7.35769	+
115	0	8.5	SV_4	SV_31	0.942857	5.12322	-5.3549	+
116	0	8.5	SV_4	SV_52	1	2.5213	-7.02476	+
117	0	8.5	SV_4	SV_30	0.942857	0.971812	7.73576	+
118	0	8.5	SV_4	SV_25	0.985611	5.34	-5.67932	+
119	0	8.5	SV_4	SV_98	0.942857	-0.546873	-7.33875	+
120	0	8.5	SV_4	SV_157	0.92582	5.57145	4.02085	+
121	0	8.5	SV_4	SV_375	0.942857	-7.43356	3.25502	+
122	4.41612	-5.06201	SV_13	SV_16	0.942857	-6.84405	3.25502	+
123	4.41612	-5.06201	SV_13	SV_54	-0.985611	-8.11373	2.07692	-
124	4.41612	-5.06201	SV_13	SV_204	0.927634	-0.945001	7.17293	+
125	4.41612	-5.06201	SV_13	SV_267	0.927634	-0.814576	8.08006	+
126	4.41612	-5.06201	SV_13	SV_157	0.92582	5.57145	4.02085	+
127	4.7988	-5.13813	SV_46	SV_287	0.927634	-1.54687	-8.33875	+
128	3.49224	-6.44469	SV_273	SV_150	-0.971008	-7.81898	3.0325	-
129	3.41612	-6.06201	SV_47	SV_156	0.942857	-4.02194	7.15151	+
130	3.41612	-6.06201	SV_47	SV_88	0.941124	-7.57269	3.20041	+
131	3.49224	-5.67932	SV_237	SV_221	0.942857	-8.40812	-0.492368	+
132	-6.50601	-0.492368	SV_129	SV_503	0.941124	-5.26281	-6.57604	+
133	-6.86928	-1.6104	SV_162	SV_78	0.927634	-7.28785	1.31061	+
134	-6.86928	-1.6104	SV_162	SV_71	0.942857	-8.00483	1.79944	+
135	-6.86928	-1.6104	SV_162	SV_307	1	-8.40812	-1.1104	+
136	-6.86928	-1.6104	SV_162	SV_211	0.985611	-2.54687	-7.33875	+
137	-8.40812	-1.1104	SV_307	SV_211	0.985611	-2.54687	-7.33875	+
138	-6.16388	2.52196	SV_6	SV_28	0.942857	-2.11982	7.15151	+
139	-6.16388	2.52196	SV_6	SV_22	0.942857	-6.57549	1.4732	+
140	-6.16388	2.52196	SV_6	SV_160	1	-7.45706	-1.80138	+
141	-6.16388	2.52196	SV_6	SV_243	0.927634	-0.989821	7.35769	+
142	-6.16388	2.52196	SV_6	SV_86	0.942857	-3.53076	-6.57604	+
143	-2.4831	6.03347	SV_18	SV_44	0.942857	-6.48721	-3.76378	+
144	-0.989821	7.35769	SV_243	SV_103	0.954864	-0.998867	7.54758	+
145	-0.989821	7.35769	SV_243	SV_86	0.927634	-3.53076	-6.57604	+
146	8.3256	-1.27763	SV_107	SV_120	0.942857	7.8016	-1.71732	+
147	8.3256	-1.27763	SV_107	SV_104	0.942857	7.11756	-1.71732	+
148	8.3256	-1.27763	SV_107	SV_204	0.927634	-0.945001	7.17293	+
149	8.3256	-1.27763	SV_107	SV_257	0.927634	6.69756	1.4212	+
150	8.3256	-1.27763	SV_107	SV_267	0.927634	-0.814576	8.08006	+
151	4.03343	-6.98589	SV_345	SV_156	0.942857	-4.02194	7.15151	+
152	4.03343	-6.98589	SV_345	SV_88	0.941124	-7.57269	3.20041	+
153	-8.06968	2.66478	SV_155	SV_249	-0.924062	3.70901	-5.3549	-
154	2.5213	-7.02476	SV_52	SV_30	0.942857	0.971812	7.73576	+
155	2.5213	-7.02476	SV_52	SV_25	0.985611	5.34	-5.67932	+
156	2.5213	-7.02476	SV_52	SV_98	0.942857	-0.546873	-7.33875	+
157	2.5213	-7.02476	SV_52	SV_157	0.92582	5.57145	4.02085	+
158	2.5213	-7.02476	SV_52	SV_375	0.942857	-7.43356	3.25502	+
159	-7.43356	1.34387	SV_50	SV_139	0.985611	-7.57269	1.39847	+
160	-6.70492	1.39847	SV_77	SV_280	-0.927634	2.15803	-8.1428	-
161	7.13145	3.32217	SV_8	SV_38	0.942857	-6.45863	3.0325	+
162	7.13145	3.32217	SV_8	SV_37	0.942857	-7.45706	0.198615	+
163	7.13145	3.32217	SV_8	SV_48	0.942857	-6.35698	1.67595	+
164	7.13145	3.32217	SV_8	SV_85	0.942857	5.57145	6.02085	+
165	7.13145	3.32217	SV_8	SV_237	0.942857	3.49224	-5.67932	+
166	7.13145	3.32217	SV_8	SV_221	1	-8.40812	-0.492368	+
167	7.13145	3.32217	SV_8	SV_114	0.927634	6.81679	-0.011583	+
168	7.45958	0.222373	SV_2	SV_129	0.942857	-6.50601	-0.492368	+
169	6.49917	-3.7431	SV_584	SV_180	0.941176	6.47477	-0.603979	+
170	6.49917	-3.7431	SV_584	SV_253	0.970588	-0.189251	8.48193	+
171	4.03343	-5.13813	SV_209	SV_115	-0.985611	-7.28785	3.28827	-
172	-8.40812	-0.492368	SV_221	SV_114	0.927634	6.81679	-0.011583	+
173	-6.35698	1.67595	SV_48	SV_243	0.927634	-0.989821	7.35769	+
174	-6.35698	1.67595	SV_48	SV_221	0.942857	-8.40812	-0.492368	+
175	-7.70213	1.4732	SV_102	SV_138	0.985611	-7.81898	1.56639	+
176	-7.70213	1.4732	SV_102	SV_135	0.985611	-8.04485	-1.6104	+
177	-2.4831	7.65151	SV_17	SV_57	-0.942857	-6.86928	0.00763246	-
178	-2.4831	7.65151	SV_17	SV_22	0.942857	-6.57549	1.4732	+
179	-2.4831	7.65151	SV_17	SV_27	1	-7.13881	1.29944	+
180	-2.4831	7.65151	SV_17	SV_156	0.942857	-4.02194	7.15151	+
181	-2.4831	7.65151	SV_17	SV_86	0.942857	-3.53076	-6.57604	+
182	0.189251	8.48193	SV_5	SV_28	0.942857	-2.11982	7.15151	+
183	0.189251	8.48193	SV_5	SV_24	0.971008	-3.07088	5.84249	+
184	0.189251	8.48193	SV_5	SV_19	-0.927634	3.9151	6.35224	-
185	0.189251	8.48193	SV_5	SV_103	0.941124	-0.998867	7.54758	+
186	0.371662	8.42837	SV_12	SV_20	0.942857	0.814576	8.08006	+
187	0.371662	8.42837	SV_12	SV_36	0.985611	-6.1416	2.22471	+
188	0.371662	8.42837	SV_12	SV_48	0.942857	-6.35698	1.67595	+
189	0.540641	8.34125	SV_74	SV_102	-0.927634	-7.70213	1.4732	-
190	0.909632	7.91542	SV_67	SV_123	0.927634	0.458227	6.61116	+
191	0.998867	7.54758	SV_33	SV_102	0.942857	-7.70213	1.4732	+
192	0.998867	7.54758	SV_33	SV_138	0.927634	-7.81898	1.56639	+
193	0.998867	7.54758	SV_33	SV_135	0.927634	-8.04485	-1.6104	+
194	0.998867	7.54758	SV_33	SV_198	-0.942857	-3.65867	7.65151	-
195	0.945001	7.17293	SV_42	SV_137	-0.927634	-6.50601	-1.1104	-
196	0.945001	7.17293	SV_42	SV_53	0.927634	4.41612	-7.06201	+
197	0.945001	7.17293	SV_42	SV_139	-0.927634	-7.57269	1.39847	-
198	0.945001	7.17293	SV_42	SV_185	0.942857	-0.866025	7	+
199	0.866025	7	SV_111	SV_53	0.927634	4.41612	-7.06201	+
200	0.866025	7	SV_111	SV_138	0.927634	-7.81898	1.56639	+
201	0.866025	7	SV_111	SV_45	-0.941124	-7.92064	1.67595	-
202	0.866025	7	SV_111	SV_135	0.927634	-8.04485	-1.6104	+
203	0.866025	7	SV_111	SV_185	0.942857	-0.866025	7	+
204	0.866025	7	SV_111	SV_80	-0.941124	-7.70213	3.12568	-
205	0.866025	7	SV_111	SV_364	0.927634	2.18304	6.35224	+
206	-0.866025	7	SV_185	SV_80	-0.941124	-7.70213	3.12568	-
207	-0.971812	7.73576	SV_248	SV_452	0.985611	0.619184	-7.02476	+
208	-0.971812	7.73576	SV_248	SV_230	0.942857	6.34961	2.94566	+
209	-0.690079	8.22373	SV_158	SV_552	0.941176	-8.04485	0.00763246	+
210	3.9151	6.35224	SV_19	SV_103	-0.924062	-0.998867	7.54758	-
211	5.57145	6.02085	SV_85	SV_237	1	3.49224	-5.67932	+
212	5.57145	6.02085	SV_85	SV_221	0.942857	-8.40812	-0.492368	+
213	7.91328	2.94566	SV_29	SV_85	0.927634	5.57145	6.02085	+
214	7.91328	2.94566	SV_29	SV_237	0.927634	3.49224	-5.67932	+
215	8.10637	2.09965	SV_58	SV_287	0.927634	-1.54687	-8.33875	+
216	8.10637	2.09965	SV_58	SV_34	1	3.04907	7.85224	+
217	6.69756	1.4212	SV_257	SV_261	-0.970588	6.15652	2.09965	-
218	7.11756	-1.71732	SV_104	SV_257	0.985611	6.69756	1.4212	+
219	7.11756	-1.71732	SV_104	SV_261	-0.985611	6.15652	2.09965	-
220	7.11756	-1.71732	SV_104	SV_253	0.927634	-0.189251	8.48193	+
221	3.70901	-6.76911	SV_118	SV_273	-0.927634	3.49224	-6.44469	-
222	3.70901	-6.76911	SV_118	SV_150	0.925476	-7.81898	3.0325	+
223	3.70901	-6.76911	SV_118	SV_503	0.954864	-5.26281	-6.57604	+
224	3.70901	-6.76911	SV_118	SV_364	0.941176	2.18304	6.35224	+
225	3.70901	-6.76911	SV_118	SV_209	0.927634	4.03343	-5.13813	+
226	0.619184	-7.02476	SV_452	SV_230	0.927634	6.34961	2.94566	+
227	-1.54687	-6.33875	SV_70	SV_50	0.942857	-7.43356	1.34387	+
228	-0.546873	-7.33875	SV_98	SV_197	0.942857	-8.13601	2.37417	+
229	-0.546873	-7.33875	SV_98	SV_248	0.942857	-0.971812	7.73576	+
230	-0.546873	-7.33875	SV_98	SV_452	0.927634	0.619184	-7.02476	+
231	-1.54687	-8.33875	SV_287	SV_34	0.927634	3.04907	7.85224	+
232	-1.54687	-8.33875	SV_287	SV_81	0.927634	-8.13601	2.22471	+
233	-6.86928	0.00763246	SV_57	SV_345	-0.942857	4.03343	-6.98589	-
234	-6.86928	0.00763246	SV_57	SV_27	-0.942857	-7.13881	1.29944	-
235	-6.86928	0.00763246	SV_57	SV_47	-0.942857	3.41612	-6.06201	-
236	-6.86928	0.00763246	SV_57	SV_202	0.941124	3.04907	5.85224	+
237	-6.86928	0.00763246	SV_57	SV_156	-1	-4.02194	7.15151	-
238	-6.86928	0.00763246	SV_57	SV_88	-0.941124	-7.57269	3.20041	-
239	-6.50601	-1.1104	SV_137	SV_45	0.954864	-7.92064	1.67595	+
240	-6.50601	-1.1104	SV_137	SV_185	-0.985611	-0.866025	7	-
241	-6.50601	-1.1104	SV_137	SV_80	0.954864	-7.70213	3.12568	+
242	-7.45706	-1.80138	SV_160	SV_243	0.927634	-0.989821	7.35769	+
243	-7.45706	-1.80138	SV_160	SV_86	0.942857	-3.53076	-6.57604	+
244	-6.84405	3.25502	SV_16	SV_31	0.942857	5.12322	-5.3549	+
245	-6.84405	3.25502	SV_16	SV_107	0.942857	8.3256	-1.27763	+
246	-6.84405	3.25502	SV_16	SV_54	-0.927634	-8.11373	2.07692	-
247	-6.84405	3.25502	SV_16	SV_204	0.985611	-0.945001	7.17293	+
248	-6.84405	3.25502	SV_16	SV_157	0.92582	5.57145	4.02085	+
249	-6.84405	3.25502	SV_16	SV_230	0.942857	6.34961	2.94566	+
250	-6.70492	3.20041	SV_15	SV_322	0.927634	-0.909632	7.91542	+
251	-6.57549	3.12568	SV_7	SV_38	0.942857	-6.45863	3.0325	+
252	-6.57549	3.12568	SV_7	SV_36	0.927634	-6.1416	2.22471	+
253	-6.57549	3.12568	SV_7	SV_28	0.942857	-2.11982	7.15151	+
254	-6.57549	3.12568	SV_7	SV_32	1	-2.11982	6.53347	+
255	-6.57549	3.12568	SV_7	SV_48	0.942857	-6.35698	1.67595	+
256	-6.57549	3.12568	SV_7	SV_22	0.942857	-6.57549	1.4732	+
257	-6.57549	3.12568	SV_7	SV_243	0.985611	-0.989821	7.35769	+
258	-6.57549	3.12568	SV_7	SV_103	0.941124	-0.998867	7.54758	+
259	-6.57549	3.12568	SV_7	SV_86	0.942857	-3.53076	-6.57604	+
260	-6.35698	2.92293	SV_14	SV_30	0.942857	0.971812	7.73576	+
261	-6.35698	2.92293	SV_14	SV_79	0.942857	8.44439	-0.603979	+
262	-6.35698	2.92293	SV_14	SV_162	0.942857	-6.86928	-1.6104	+
263	-6.35698	2.92293	SV_14	SV_256	-0.985611	-0.458227	6.61116	-
264	-6.35698	2.92293	SV_14	SV_45	0.941124	-7.92064	1.67595	+
265	-6.35698	2.92293	SV_14	SV_307	0.942857	-8.40812	-1.1104	+
266	-6.35698	2.92293	SV_14	SV_80	0.941124	-7.70213	3.12568	+
267	-6.35698	2.92293	SV_14	SV_211	0.927634	-2.54687	-7.33875	+
268	-6.98976	1.31061	SV_239	SV_155	-0.927634	-8.06968	2.66478	-
269	-6.98976	1.31061	SV_239	SV_109	-0.942857	-7.92064	2.92293	-
270	-6.98976	1.31061	SV_239	SV_249	0.941124	3.70901	-5.3549	+
271	-7.81898	1.56639	SV_138	SV_45	-0.924062	-7.92064	1.67595	-
272	-7.81898	1.56639	SV_138	SV_135	1	-8.04485	-1.6104	+
273	-7.81898	1.56639	SV_138	SV_198	-0.927634	-3.65867	7.65151	-
274	-7.81898	1.56639	SV_138	SV_80	-0.924062	-7.70213	3.12568	-
275	-7.92064	1.67595	SV_45	SV_135	-0.924062	-8.04485	-1.6104	-
276	-7.92064	1.67595	SV_45	SV_185	-0.941124	-0.866025	7	-
277	-7.92064	1.67595	SV_45	SV_80	1	-7.70213	3.12568	+
278	-3.07088	5.84249	SV_24	SV_19	-0.940403	3.9151	6.35224	-
279	-3.65867	6.03347	SV_40	SV_257	0.927634	6.69756	1.4212	+
280	-3.65867	6.03347	SV_40	SV_552	0.927634	-8.04485	0.00763246	+
281	-0.281733	6.54051	SV_244	SV_249	-0.941124	3.70901	-5.3549	-
282	3.04907	5.85224	SV_202	SV_156	-0.941124	-4.02194	7.15151	-
283	8.10237	-0.011583	SV_10	SV_137	0.927634	-6.50601	-1.1104	+
284	8.10237	-0.011583	SV_10	SV_83	0.942857	0.095056	6.50453	+
285	8.10237	-0.011583	SV_10	SV_26	0.985611	-0.095056	6.50453	+
286	8.10237	-0.011583	SV_10	SV_162	0.942857	-6.86928	-1.6104	+
287	8.10237	-0.011583	SV_10	SV_307	0.942857	-8.40812	-1.1104	+
288	8.10237	-0.011583	SV_10	SV_211	0.985611	-2.54687	-7.33875	+
289	6.59355	-1.27763	SV_60	SV_114	0.940403	6.81679	-0.011583	+
290	6.59355	-1.27763	SV_60	SV_375	0.971008	-7.43356	3.25502	+
291	5.12322	-5.3549	SV_31	SV_52	0.942857	2.5213	-7.02476	+
292	5.12322	-5.3549	SV_31	SV_25	0.927634	5.34	-5.67932	+
293	5.12322	-5.3549	SV_31	SV_204	0.927634	-0.945001	7.17293	+
294	5.12322	-5.3549	SV_31	SV_248	0.942857	-0.971812	7.73576	+
295	5.12322	-5.3549	SV_31	SV_157	0.92582	5.57145	4.02085	+
296	-6.20793	2.66478	SV_59	SV_18	0.942857	-2.4831	6.03347	+
297	-7.28785	1.31061	SV_78	SV_71	0.927634	-8.00483	1.79944	+
298	-7.28785	1.31061	SV_78	SV_307	0.927634	-8.40812	-1.1104	+
