# Supplementary material for: Dynamic changes in prokaryotic and eukaryotic communities and networks in a minimally managed cabbage-cultivated field soils
Source: Research Square preprint supplement (doi:10.21203/rs.3.rs-4792790/v1), 2024-08-21
Supplement: Supplementary file 2 [file 990cf6e066de513f40be9ff3.xlsx]

## Sheet: Soil chemkical data
Supplementary Data S3. Chemical parameter data of sample soils.
Sampling date	Sampling site	EC[dS/m]	pH(H2O)	pH(KCl)	NH4-N[mg/100g]	NO3-N[mg/100g]	Tr-P2O5[mg/100g]	CEC[mg/100g]	CaO[mg/100g]
2021-02-20	Control site_a	0.06	7.54	6.64	0.5	0.5	14	10	160
2021-02-20	Control site_b	0.07	7.42	6.34	0.5	0.4	14	19	200
2021-02-20	Control site_c	0.07	7.08	6.15	0.4	0.6	16	20	240
2021-02-20	Plant site_a	0.08	7.47	6.55	0.4	0.7	15	14	230
2021-02-20	Plant site_b	0.09	7.04	6.16	0.5	1.4	14	28	260
2021-02-20	Plant site_c	0.07	7.24	6.29	0.5	0.7	12	17	230
2021-04-20	Control site_a	0.05	7.48	6.54	0.5	0.1	19	9.2	170
2021-04-20	Control site_b	0.05	7.52	6.59	0.5	0.1	17	8	190
2021-04-20	Control site_c	0.04	7.41	6.31	0.4	0.1	20	8.8	140
2021-04-20	Plant site_a	0.04	7.3	6.34	0.7	0.1	13	11	160
2021-04-20	Plant site_b	0.04	7.35	6.41	0.7	0.1	14	12	170
2021-04-20	Plant site_c	0.05	7.33	6.43	0.6	0.3	16	11	170
2021-05-24	Control site_a	0.05	7.2	6.4	0.6	0.2	15	10	170
2021-05-24	Control site_b	0.05	7.34	6.51	0.7	0.1	13	13	190
2021-05-24	Control site_c	0.03	7.2	6.13	0.7	0.1	8.8	9	130
2021-05-24	Plant site_a	0.04	7.25	6.22	0.6	0.1	12	11	150
2021-05-24	Plant site_b	0.04	7.27	6.31	0.6	0.1	13	12	170
2021-05-24	Plant site_c	0.04	7.23	6.38	0.8	0.1	15	12	190
2021-06-16	Control site_a	0.05	7.22	6.4	0.3	0.1	16	10	180
2021-06-16	Control site_b	0.05	7.5	6.56	0.7	0.1	14	11	190
2021-06-16	Control site_c	0.03	7.28	6.12	0.3	0.1	11	9.4	140
2021-06-16	Plant site_a	0.03	7.03	6.02	0.5	0.1	9.4	10	160
2021-06-16	Plant site_b	0.03	7.1	6.22	1.2	0.1	10	11	160
2021-06-16	Plant site_c	0.04	7.31	6.32	0.5	0.1	11	11	160
2021-08-25	Control site_a	0.05	7.28	6.3	0.9	0.1	14	10	180
2021-08-25	Control site_b	0.05	7.54	6.56	0.3	0.1	14	11	190
2021-08-25	Control site_c	0.03	7.24	6.16	0.9	0.1	9.1	9.7	150
2021-08-25	Plant site_a	0.03	7.03	5.94	1.2	0.3	8.8	8.7	140
2021-08-25	Plant site_b	0.04	7.24	6.2	1.1	0.3	8.1	8.9	160
2021-08-25	Plant site_c	0.04	7.23	6.27	0.6	0.2	10	9.6	160
Sampling date	Sampling site	MgO[mg/100g]	K2O[mg/100g]	Humus[%]	Ca_saturation[%]	Mg_saturation[%]	K_saturation[%]	Cl_saturation[%]
2021-02-20	Control site_a	11	8.8	0.9	57	5.5	1.9	65
2021-02-20	Control site_b	18	9.3	1.2	38	4.7	1	43
2021-02-20	Control site_c	26	10	1.2	43	6.5	1.1	50
2021-02-20	Plant site_a	18	11	1.2	59	6.4	1.7	67
2021-02-20	Plant site_b	29	11	1.3	33	5.2	0.8	39
2021-02-20	Plant site_c	23	9.8	1.2	48	6.8	1.2	56
2021-04-20	Control site_a	15	9.2	1.1	66	8.2	2.1	76
2021-04-20	Control site_b	15	9.9	1.1	85	9.4	2.6	97
2021-04-20	Control site_c	17	10.3	1	57	9.7	2.5	69
2021-04-20	Plant site_a	15	10	1.1	52	6.8	1.9	61
2021-04-20	Plant site_b	16	9.9	1.1	51	6.7	1.8	59
2021-04-20	Plant site_c	15	9.6	1	55	6.8	1.9	64
2021-05-24	Control site_a	14	9.8	1.1	61	7	2.1	70
2021-05-24	Control site_b	14	9.5	1.1	52	5.4	1.6	59
2021-05-24	Control site_c	14	9.2	1	52	7.8	2.2	62
2021-05-24	Plant site_a	15	9.3	1.1	49	6.8	1.8	57
2021-05-24	Plant site_b	16	10	1	51	6.7	1.8	59
2021-05-24	Plant site_c	16	10	1	57	6.7	1.8	65
2021-06-16	Control site_a	14	10	1.1	64	7	2.1	73
2021-06-16	Control site_b	14	10	1.1	62	6.4	1.9	70
2021-06-16	Control site_c	15	9.6	1	53	8	2.2	63
2021-06-16	Plant site_a	15	11	1	57	7.5	2.3	67
2021-06-16	Plant site_b	14	11	1	52	6.4	2.1	60
2021-06-16	Plant site_c	14	10	1.1	52	6.4	1.9	60
2021-08-25	Control site_a	13	7.8	1	64	6.5	1.7	72
2021-08-25	Control site_b	14	8.1	0.9	62	6.4	1.6	70
2021-08-25	Control site_c	15	7.7	0.9	55	7.7	1.7	65
2021-08-25	Plant site_a	15	8.8	0.5	57	8.6	2.2	68
2021-08-25	Plant site_b	15	9.5	1.2	64	8.4	2.3	75
2021-08-25	Plant site_c	13	8.2	0.8	60	6.8	1.8	68
Sample soils were isolated from independent three sites (a, b, and c) at control and plant sites on the indecated date. 15 parameters of the sample were measured and indicated in the table: cation-exchange capacity (CEC), pH in water and KCl solution (pH(H2O), pH(KCl)), nitrate nitrogen (NO3-N), ammonium nitrogen (NH4-N), exchangeable potassium (K2O), exchangeable magnesium (MgO), exchangeable ca…
