# Supplementary material for: Dynamic changes in prokaryotic and eukaryotic communities and networks in a minimally managed cabbage-cultivated field soils
Source: Research Square preprint supplement (doi:10.21203/rs.3.rs-4792790/v1), 2024-08-21
Supplement: Supplementary file 3 [file e24050c529dc8e1d51f12b4b.xlsx]

## Sheet: Read me
Supplementary Data S2. Edge data of the eukaryotic networks in the samples.
Edge data contains name of OTU_1 and OTU_2 (linked pair node SVs), interaction papoameter values, and negative or positive link (cor).
The data in each sample is indicated in the separated Excel sheet.

## Sheet: edge_data_18S_net_Feb
	X2	Y2	OTU_2	OTU_1	weight	X1	Y1	cor
1	0	7.26	SV_1	SV_193	0.942857	NA	NA	+
2	0	7.26	SV_1	SV_346	1	NA	NA	+
3	8.08266887437253e-17	5.94	SV_5	SV_40	-0.927634	-5.95653	-0.162631	-
4	8.08266887437253e-17	5.94	SV_5	SV_131	-0.927634	NA	NA	-
5	5.22903	3.23093	SV_325	SV_295	1	3.87768	4.68075	+
6	5.22903	3.23093	SV_325	SV_427	1	-3.89467	5.32837	+
7	6.19201	-0.513539	SV_120	SV_288	0.941176	6.02842	-0.324744	+
8	5.99964	0.27943	SV_443	SV_96	-0.970588	4.67991	3.93644	-
9	5.99964	0.27943	SV_443	SV_466	1	4.78513	4.24292	+
10	5.99964	0.27943	SV_443	SV_343	0.941176	6.01047	-1.43057	+
11	5.99964	0.27943	SV_443	SV_521	0.970588	6.47509	0.653329	+
12	6.76939	-1.59189	SV_65	SV_77	0.927634	6.8453	0.617979	+
13	6.76939	-1.59189	SV_65	SV_19	0.927634	NA	NA	+
14	6.76939	-1.59189	SV_65	SV_141	0.927634	NA	NA	+
15	6.76939	-1.59189	SV_65	SV_27	0.985611	5.89019	3.52095	+
16	6.76939	-1.59189	SV_65	SV_238	0.985611	6.41614	-2.67909	+
17	6.76939	-1.59189	SV_65	SV_117	0.927634	-2.02851	-5.62054	+
18	6.76939	-1.59189	SV_65	SV_111	0.927634	5.34383	-3.21343	+
19	-6.88634	-0.610407	SV_84	SV_128	-0.927634	NA	NA	-
20	-6.88634	-0.610407	SV_84	SV_289	-0.924062	4.69785	4.04395	-
21	-6.88634	-0.610407	SV_84	SV_254	-0.924062	NA	NA	-
22	-6.88634	-0.610407	SV_84	SV_343	0.941176	6.01047	-1.43057	+
23	-6.28215	1.36351	SV_34	SV_323	0.941124	7.09879	-0.426952	+
24	-6.28215	1.36351	SV_34	SV_28	0.941124	3.21768	5.34075	+
25	3.87768	6.00075	SV_110	SV_45	0.942857	NA	NA	+
26	4.34437	5.80744	SV_75	SV_86	-0.941124	NA	NA	-
27	4.34437	5.80744	SV_75	SV_136	-0.941124	7.25925	0.0366598	-
28	4.34437	5.80744	SV_75	SV_111	-0.941124	5.34383	-3.21343	-
29	3.87768	4.68075	SV_295	SV_427	1	-3.89467	5.32837	+
30	5.55196	4.50617	SV_43	SV_340	-0.942857	6.1012	-0.426952	-
31	5.65178	4.46239	SV_61	SV_95	-0.942857	5.55196	3.25769	-
32	5.65178	4.46239	SV_61	SV_267	0.942857	NA	NA	+
33	5.9954	3.93644	SV_48	SV_240	-0.927634	5.94075	0.0366598	-
34	5.89019	3.52095	SV_27	SV_238	0.942857	6.41614	-2.67909	+
35	5.89019	3.52095	SV_27	SV_105	0.927634	6.3547	0.617979	+
36	5.65178	3.30148	SV_125	SV_152	-1	7.20036	0.27943	-
37	5.65178	3.30148	SV_125	SV_70	0.942857	7.2237	-0.210609	+
38	5.65178	3.30148	SV_125	SV_84	-0.985611	-6.88634	-0.610407	-
39	5.65178	3.30148	SV_125	SV_254	0.941124	NA	NA	+
40	5.65178	3.30148	SV_125	SV_343	-0.927634	6.01047	-1.43057	-
41	5.65178	3.30148	SV_125	SV_521	-0.927634	6.47509	0.653329	-
42	5.55196	3.25769	SV_95	SV_277	0.941124	NA	NA	+
43	5.55196	3.25769	SV_95	SV_210	0.942857	7.25328	-0.088672	+
44	5.55196	3.25769	SV_95	SV_253	-0.942857	5.12336	3.25769	-
45	5.55196	3.25769	SV_95	SV_304	0.942857	7.00798	-0.513539	+
46	5.55196	3.25769	SV_95	SV_414	0.927634	NA	NA	+
47	5.02353	3.30148	SV_104	SV_499	0.92582	5.34383	-4.53343	+
48	4.69785	4.04395	SV_289	SV_254	0.935484	NA	NA	+
49	4.69785	4.04395	SV_289	SV_343	-0.924062	6.01047	-1.43057	-
50	6.27567	2.70351	SV_37	SV_126	-0.942857	4.78513	3.52095	-
51	6.27567	2.70351	SV_37	SV_278	0.927634	6.14455	0.48292	+
52	6.27567	1.38351	SV_204	SV_340	-0.942857	6.1012	-0.426952	-
53	7.13762	0.388093	SV_62	SV_288	-0.927634	6.02842	-0.324744	-
54	7.13762	0.388093	SV_62	SV_433	-0.927634	-5.33147	-3.89043	-
55	7.13762	0.388093	SV_62	SV_482	-0.942857	6.24317	0.560483	-
56	6.90243	-0.581376	SV_334	SV_128	-0.927634	NA	NA	-
57	6.90243	-0.581376	SV_334	SV_443	1	5.99964	0.27943	+
58	6.90243	-0.581376	SV_334	SV_96	-0.970588	4.67991	3.93644	-
59	6.90243	-0.581376	SV_334	SV_466	1	4.78513	4.24292	+
60	6.90243	-0.581376	SV_334	SV_343	0.941176	6.01047	-1.43057	+
61	6.90243	-0.581376	SV_334	SV_521	0.970588	6.47509	0.653329	+
62	6.29757	-0.581376	SV_173	SV_52	0.942857	5.9763	-0.210609	+
63	6.29757	-0.581376	SV_173	SV_267	-0.942857	NA	NA	-
64	6.02842	-0.324744	SV_288	SV_298	0.927634	5.65122	-1.82956	+
65	6.1417	-2.67909	SV_221	SV_296	0.954864	2.43645	-6.80799	+
66	5.70734	-2.36351	SV_389	SV_32	0.927634	-7.11599	0.395736	+
67	6.01047	-1.43057	SV_343	SV_521	0.970588	6.47509	0.653329	+
68	-7.24343	-0.162631	SV_39	SV_49	-0.941124	4.69785	3.71991	-
69	-6.28215	2.68351	SV_57	SV_289	0.941124	4.69785	4.04395	+
70	-5.35	4.52491	SV_33	SV_105	0.941176	6.3547	0.617979	+
71	-5.35	4.52491	SV_33	SV_499	0.939336	5.34383	-4.53343	+
72	5.44629	4.53293	SV_16	SV_57	-0.942857	-6.28215	2.68351	-
73	5.44629	4.53293	SV_16	SV_414	0.927634	NA	NA	+
74	5.44629	4.53293	SV_16	SV_289	-0.941124	4.69785	4.04395	-
75	6.53726	-0.651756	SV_233	SV_173	0.942857	6.29757	-0.581376	+
76	6.53726	-0.651756	SV_233	SV_208	0.942857	NA	NA	+
77	6.53726	-0.651756	SV_233	SV_52	1	5.9763	-0.210609	+
78	5.33766	4.54193	SV_8	SV_94	1	6.54737	-1.43057	+
79	5.33766	4.54193	SV_8	SV_121	0.927634	2.03851	6.2773	+
80	5.33766	4.54193	SV_8	SV_172	0.985611	6.66686	-2.56746	+
81	5.33766	4.54193	SV_8	SV_334	0.985611	6.90243	-0.581376	+
82	5.33766	4.54193	SV_8	SV_443	0.985611	5.99964	0.27943	+
83	5.33766	4.54193	SV_8	SV_96	-0.927634	4.67991	3.93644	-
84	5.33766	4.54193	SV_8	SV_466	0.985611	4.78513	4.24292	+
85	5.33766	4.54193	SV_8	SV_343	0.927634	6.01047	-1.43057	+
86	5.33766	4.54193	SV_8	SV_521	0.985611	6.47509	0.653329	+
87	5.94207	3.61681	SV_80	SV_499	0.92582	5.34383	-4.53343	+
88	4.67991	3.93644	SV_96	SV_466	-0.970588	4.78513	4.24292	-
89	6.6	0.665256	SV_20	SV_15	0.942857	NA	NA	+
90	6.6	0.665256	SV_20	SV_19	0.942857	NA	NA	+
91	6.6	0.665256	SV_20	SV_75	-0.941124	4.34437	5.80744	-
92	6.6	0.665256	SV_20	SV_86	0.942857	NA	NA	+
93	6.6	0.665256	SV_20	SV_136	0.942857	7.25925	0.0366598	+
94	6.6	0.665256	SV_20	SV_183	0.942857	NA	NA	+
95	6.6	0.665256	SV_20	SV_111	0.942857	5.34383	-3.21343	+
96	6.6	0.665256	SV_20	SV_18	0.985611	1.42081	-6.07009	+
97	6.6	0.665256	SV_20	SV_494	0.942857	-2.0585	6.27077	+
98	6.8453	0.617979	SV_77	SV_19	0.942857	NA	NA	+
99	6.8453	0.617979	SV_77	SV_75	-0.941124	4.34437	5.80744	-
100	6.8453	0.617979	SV_77	SV_27	0.942857	5.89019	3.52095	+
101	6.8453	0.617979	SV_77	SV_111	0.942857	5.34383	-3.21343	+
102	7.20036	0.27943	SV_152	SV_70	-0.942857	7.2237	-0.210609	-
103	7.20036	0.27943	SV_152	SV_84	0.985611	-6.88634	-0.610407	+
104	7.20036	0.27943	SV_152	SV_254	-0.941124	NA	NA	-
105	7.20036	0.27943	SV_152	SV_343	0.927634	6.01047	-1.43057	+
106	7.20036	0.27943	SV_152	SV_521	0.927634	6.47509	0.653329	+
107	7.09879	-0.426952	SV_323	SV_28	1	3.21768	5.34075	+
108	7.00798	-0.513539	SV_304	SV_414	0.927634	NA	NA	+
109	6.66273	-0.651756	SV_258	SV_39	-0.942857	-7.24343	-0.162631	-
110	6.1012	-0.426952	SV_340	SV_327	0.927634	3.31461	-5.66457	+
111	6.3547	0.617979	SV_105	SV_499	0.939336	5.34383	-4.53343	+
112	6.27892	-1.37351	SV_13	SV_8	0.942857	5.33766	4.54193	+
113	6.27892	-1.37351	SV_13	SV_94	0.942857	6.54737	-1.43057	+
114	6.27892	-1.37351	SV_13	SV_121	0.985611	2.03851	6.2773	+
115	6.27892	-1.37351	SV_13	SV_172	0.927634	6.66686	-2.56746	+
116	6.27892	-1.37351	SV_13	SV_125	-0.942857	5.65178	3.30148	-
117	6.27892	-1.37351	SV_13	SV_152	0.942857	7.20036	0.27943	+
118	6.27892	-1.37351	SV_13	SV_334	0.927634	6.90243	-0.581376	+
119	6.27892	-1.37351	SV_13	SV_84	0.927634	-6.88634	-0.610407	+
120	6.27892	-1.37351	SV_13	SV_414	0.927634	NA	NA	+
121	6.27892	-1.37351	SV_13	SV_443	0.927634	5.99964	0.27943	+
122	6.27892	-1.37351	SV_13	SV_466	0.927634	4.78513	4.24292	+
123	6.27892	-1.37351	SV_13	SV_254	-0.941124	NA	NA	-
124	6.27892	-1.37351	SV_13	SV_343	0.985611	6.01047	-1.43057	+
125	6.27892	-1.37351	SV_13	SV_521	0.985611	6.47509	0.653329	+
126	6.90662	-1.82956	SV_102	SV_172	0.927634	6.66686	-2.56746	+
127	6.90662	-1.82956	SV_102	SV_174	0.927634	NA	NA	+
128	6.90662	-1.82956	SV_102	SV_296	0.941124	2.43645	-6.80799	+
129	6.90662	-1.82956	SV_102	SV_334	0.927634	6.90243	-0.581376	+
130	6.90662	-1.82956	SV_102	SV_443	0.927634	5.99964	0.27943	+
131	6.90662	-1.82956	SV_102	SV_466	0.927634	4.78513	4.24292	+
132	6.66686	-2.56746	SV_172	SV_334	1	6.90243	-0.581376	+
133	6.66686	-2.56746	SV_172	SV_128	-0.927634	NA	NA	-
134	6.66686	-2.56746	SV_172	SV_443	1	5.99964	0.27943	+
135	6.66686	-2.56746	SV_172	SV_96	-0.970588	4.67991	3.93644	-
136	6.66686	-2.56746	SV_172	SV_466	1	4.78513	4.24292	+
137	6.66686	-2.56746	SV_172	SV_343	0.941176	6.01047	-1.43057	+
138	6.66686	-2.56746	SV_172	SV_521	0.970588	6.47509	0.653329	+
139	5.62253	-2.1025	SV_139	SV_482	-0.942857	6.24317	0.560483	-
140	5.34383	-3.21343	SV_111	SV_18	0.927634	1.42081	-6.07009	+
141	2.6762	-6.07009	SV_133	SV_139	0.942857	5.62253	-2.1025	+
142	1.66057	-6.80799	SV_292	SV_344	0.942857	4.93228	4.40277	+
143	1.66057	-6.80799	SV_292	SV_197	0.927634	5.02353	4.46239	+
144	-6.27241	-1.3935	SV_9	SV_161	1	3.88618	-4.67457	+
145	-6.27241	-1.3935	SV_9	SV_62	0.942857	7.13762	0.388093	+
146	-6.27241	-1.3935	SV_9	SV_70	0.942857	7.2237	-0.210609	+
147	-6.27241	-1.3935	SV_9	SV_139	0.942857	5.62253	-2.1025	+
148	-6.08397	0.395736	SV_26	SV_46	-0.942857	5.94207	4.14705	-
149	-6.08397	0.395736	SV_26	SV_129	0.942857	5.97746	4.04395	+
150	-6.08397	0.395736	SV_26	SV_160	0.942857	NA	NA	+
151	-6.08397	0.395736	SV_26	SV_67	0.942857	NA	NA	+
152	-5.95653	-0.162631	SV_40	SV_376	-0.927634	4.93228	3.3611	-
153	2.03851	6.2773	SV_121	SV_172	0.941176	6.66686	-2.56746	+
154	2.03851	6.2773	SV_121	SV_125	-0.927634	5.65178	3.30148	-
155	2.03851	6.2773	SV_121	SV_152	0.927634	7.20036	0.27943	+
156	2.03851	6.2773	SV_121	SV_334	0.941176	6.90243	-0.581376	+
157	2.03851	6.2773	SV_121	SV_84	0.941176	-6.88634	-0.610407	+
158	2.03851	6.2773	SV_121	SV_414	0.941176	NA	NA	+
159	2.03851	6.2773	SV_121	SV_443	0.941176	5.99964	0.27943	+
160	2.03851	6.2773	SV_121	SV_289	-0.924062	4.69785	4.04395	-
161	2.03851	6.2773	SV_121	SV_466	0.941176	4.78513	4.24292	+
162	2.03851	6.2773	SV_121	SV_254	-0.924062	NA	NA	-
163	2.03851	6.2773	SV_121	SV_343	1	6.01047	-1.43057	+
164	2.03851	6.2773	SV_121	SV_521	0.970588	6.47509	0.653329	+
165	5.74304	4.40277	SV_55	SV_82	0.927634	NA	NA	+
166	5.97746	4.04395	SV_129	SV_141	0.942857	NA	NA	+
167	5.97746	4.04395	SV_129	SV_226	0.942857	NA	NA	+
168	5.97746	4.04395	SV_129	SV_323	0.941124	7.09879	-0.426952	+
169	5.97746	4.04395	SV_129	SV_117	0.942857	-2.02851	-5.62054	+
170	5.97746	4.04395	SV_129	SV_28	0.941124	3.21768	5.34075	+
171	5.9954	3.82743	SV_114	SV_63	0.927634	5.44629	3.23093	+
172	5.9954	3.82743	SV_114	SV_258	0.942857	6.66273	-0.651756	+
173	5.9954	3.82743	SV_114	SV_39	-1	-7.24343	-0.162631	-
174	5.9954	3.82743	SV_114	SV_49	0.941124	4.69785	3.71991	+
175	4.93228	3.3611	SV_376	SV_131	-0.927634	NA	NA	-
176	4.69785	3.71991	SV_49	SV_513	0.924062	NA	NA	+
177	7.24139	0.160857	SV_164	SV_277	0.941124	NA	NA	+
178	7.24139	0.160857	SV_164	SV_45	0.942857	NA	NA	+
179	7.24139	0.160857	SV_164	SV_233	0.942857	6.53726	-0.651756	+
180	7.24139	0.160857	SV_164	SV_52	0.942857	5.9763	-0.210609	+
181	3.88618	-4.67457	SV_161	SV_62	0.942857	7.13762	0.388093	+
182	3.88618	-4.67457	SV_161	SV_70	0.942857	7.2237	-0.210609	+
183	3.88618	-4.67457	SV_161	SV_139	0.942857	5.62253	-2.1025	+
184	-6.59998	0.644233	SV_23	SV_48	0.942857	5.9954	3.93644	+
185	-6.59998	0.644233	SV_23	SV_240	-0.927634	5.94075	0.0366598	-
186	-4.77842	3.53491	SV_2	SV_389	-0.970588	5.70734	-2.36351	-
187	-4.77842	3.53491	SV_2	SV_32	-0.927634	-7.11599	0.395736	-
188	-5.62215	2.02351	SV_53	SV_499	0.92582	5.34383	-4.53343	+
189	4.78513	4.24292	SV_466	SV_343	0.941176	6.01047	-1.43057	+
190	4.78513	4.24292	SV_466	SV_521	0.970588	6.47509	0.653329	+
191	-6.27241	-2.7135	SV_422	SV_513	0.985611	NA	NA	+
192	-6.31362	-0.610407	SV_42	SV_197	0.970588	5.02353	4.46239	+
193	4.53768	5.34075	SV_224	SV_335	-0.927634	NA	NA	-
194	4.53768	5.34075	SV_224	SV_327	0.985611	3.31461	-5.66457	+
195	7.25328	-0.088672	SV_210	SV_253	-1	5.12336	3.25769	-
196	7.25328	-0.088672	SV_210	SV_304	1	7.00798	-0.513539	+
197	7.25328	-0.088672	SV_210	SV_414	0.927634	NA	NA	+
198	7.2237	-0.210609	SV_70	SV_84	-0.927634	-6.88634	-0.610407	-
199	7.2237	-0.210609	SV_70	SV_254	0.941124	NA	NA	+
200	2.04851	-5.61404	SV_3	SV_20	0.942857	6.6	0.665256	+
201	2.04851	-5.61404	SV_3	SV_75	-0.941124	4.34437	5.80744	-
202	2.04851	-5.61404	SV_3	SV_86	1	NA	NA	+
203	2.04851	-5.61404	SV_3	SV_136	1	7.25925	0.0366598	+
204	-5.33147	-3.89043	SV_433	SV_298	0.927634	5.65122	-1.82956	+
205	5.82324	4.32894	SV_21	SV_153	-0.942857	NA	NA	-
206	5.82324	4.32894	SV_21	SV_288	-0.927634	6.02842	-0.324744	-
207	5.82324	4.32894	SV_21	SV_433	-0.927634	-5.33147	-3.89043	-
208	5.82324	4.32894	SV_21	SV_298	-1	5.65122	-1.82956	-
209	4.34437	4.87406	SV_29	SV_32	0.941124	-7.11599	0.395736	+
210	5.44629	3.23093	SV_63	SV_39	-0.927634	-7.24343	-0.162631	-
211	5.12336	3.25769	SV_253	SV_304	-1	7.00798	-0.513539	-
212	5.12336	3.25769	SV_253	SV_414	-0.927634	NA	NA	-
213	6.54737	-1.43057	SV_94	SV_121	0.927634	2.03851	6.2773	+
214	6.54737	-1.43057	SV_94	SV_172	0.985611	6.66686	-2.56746	+
215	6.54737	-1.43057	SV_94	SV_334	0.985611	6.90243	-0.581376	+
216	6.54737	-1.43057	SV_94	SV_443	0.985611	5.99964	0.27943	+
217	6.54737	-1.43057	SV_94	SV_96	-0.927634	4.67991	3.93644	-
218	6.54737	-1.43057	SV_94	SV_466	0.985611	4.78513	4.24292	+
219	6.54737	-1.43057	SV_94	SV_343	0.927634	6.01047	-1.43057	+
220	6.54737	-1.43057	SV_94	SV_521	0.985611	6.47509	0.653329	+
221	5.94207	4.14705	SV_46	SV_174	-0.927634	NA	NA	-
222	5.94207	4.14705	SV_46	SV_160	-1	NA	NA	-
223	5.94207	4.14705	SV_46	SV_226	-0.942857	NA	NA	-
224	6.41614	-2.67909	SV_238	SV_117	0.942857	-2.02851	-5.62054	+
225	6.41614	-2.67909	SV_238	SV_111	0.942857	5.34383	-3.21343	+
226	6.41614	-2.67909	SV_238	SV_494	0.942857	-2.0585	6.27077	+
227	-2.02851	-6.94054	SV_97	SV_344	-0.942857	4.93228	4.40277	-
228	NA	NA	SV_12	SV_19	0.942857	NA	NA	+
229	NA	NA	SV_12	SV_111	0.942857	5.34383	-3.21343	+
230	NA	NA	SV_15	SV_183	1	NA	NA	+
231	NA	NA	SV_15	SV_409	0.942857	-3.86917	-5.34692	+
232	NA	NA	SV_15	SV_18	0.985611	1.42081	-6.07009	+
233	NA	NA	SV_82	SV_77	0.942857	6.8453	0.617979	+
234	NA	NA	SV_82	SV_75	-0.941124	4.34437	5.80744	-
235	NA	NA	SV_82	SV_83	0.927634	NA	NA	+
236	NA	NA	SV_82	SV_157	0.941124	-6.94215	2.02351	+
237	NA	NA	SV_19	SV_75	-0.941124	4.34437	5.80744	-
238	NA	NA	SV_19	SV_238	0.942857	6.41614	-2.67909	+
239	NA	NA	SV_19	SV_111	1	5.34383	-3.21343	+
240	NA	NA	SV_19	SV_18	0.927634	1.42081	-6.07009	+
241	NA	NA	SV_153	SV_288	0.927634	6.02842	-0.324744	+
242	NA	NA	SV_153	SV_433	0.927634	-5.33147	-3.89043	+
243	NA	NA	SV_153	SV_298	0.942857	5.65122	-1.82956	+
244	NA	NA	SV_153	SV_244	0.942857	NA	NA	+
245	NA	NA	SV_141	SV_238	0.942857	6.41614	-2.67909	+
246	NA	NA	SV_141	SV_67	0.942857	NA	NA	+
247	NA	NA	SV_141	SV_117	1	-2.02851	-5.62054	+
248	NA	NA	SV_69	SV_53	1	-5.62215	2.02351	+
249	NA	NA	SV_69	SV_499	0.92582	5.34383	-4.53343	+
250	NA	NA	SV_83	SV_157	0.924062	-6.94215	2.02351	+
251	NA	NA	SV_174	SV_160	0.927634	NA	NA	+
252	NA	NA	SV_160	SV_226	0.942857	NA	NA	+
253	NA	NA	SV_222	SV_244	0.942857	NA	NA	+
254	NA	NA	SV_166	SV_335	-0.985611	NA	NA	-
255	NA	NA	SV_166	SV_463	0.941124	4.73325	4.14705	+
256	NA	NA	SV_226	SV_95	0.942857	5.55196	3.25769	+
257	NA	NA	SV_226	SV_323	0.941124	7.09879	-0.426952	+
258	NA	NA	SV_226	SV_28	0.941124	3.21768	5.34075	+
259	NA	NA	SV_86	SV_136	1	7.25925	0.0366598	+
260	NA	NA	SV_277	SV_210	0.941124	7.25328	-0.088672	+
261	NA	NA	SV_277	SV_323	0.935484	7.09879	-0.426952	+
262	NA	NA	SV_277	SV_253	-0.941124	5.12336	3.25769	-
263	NA	NA	SV_277	SV_304	0.941124	7.00798	-0.513539	+
264	NA	NA	SV_277	SV_233	0.941124	6.53726	-0.651756	+
265	NA	NA	SV_277	SV_52	0.941124	5.9763	-0.210609	+
266	NA	NA	SV_277	SV_28	0.935484	3.21768	5.34075	+
267	NA	NA	SV_45	SV_173	0.942857	6.29757	-0.581376	+
268	NA	NA	SV_263	SV_29	0.941124	4.34437	4.87406	+
269	NA	NA	SV_193	SV_482	-0.942857	6.24317	0.560483	-
270	NA	NA	SV_193	SV_346	0.942857	NA	NA	+
271	NA	NA	SV_67	SV_117	0.942857	-2.02851	-5.62054	+
272	NA	NA	SV_67	SV_494	0.942857	-2.0585	6.27077	+
273	NA	NA	SV_335	SV_340	-0.927634	6.1012	-0.426952	-
274	NA	NA	SV_335	SV_463	-0.924062	4.73325	4.14705	-
275	NA	NA	SV_183	SV_409	0.942857	-3.86917	-5.34692	+
276	NA	NA	SV_183	SV_18	0.985611	1.42081	-6.07009	+
277	NA	NA	SV_128	SV_433	-0.927634	-5.33147	-3.89043	-
278	NA	NA	SV_128	SV_443	-0.927634	5.99964	0.27943	-
279	NA	NA	SV_128	SV_96	0.985611	4.67991	3.93644	+
280	NA	NA	SV_128	SV_466	-0.927634	4.78513	4.24292	-
281	NA	NA	SV_274	SV_229	1	5.22903	4.53293	+
282	NA	NA	SV_208	SV_52	0.942857	5.9763	-0.210609	+
283	NA	NA	SV_208	SV_105	0.927634	6.3547	0.617979	+
284	NA	NA	SV_414	SV_289	-0.924062	4.69785	4.04395	-
285	NA	NA	SV_414	SV_463	0.954864	4.73325	4.14705	+
286	NA	NA	SV_414	SV_254	-0.924062	NA	NA	-
287	NA	NA	SV_414	SV_343	0.941176	6.01047	-1.43057	+
288	NA	NA	SV_254	SV_343	-0.924062	6.01047	-1.43057	-

## Sheet: edge_data_18S_net_Apr
	X2	Y2	OTU_2	OTU_1	weight	X1	Y1	cor
1	0	7.65	SV_1	SV_164	0.985611	5.43787	-2.66618	+
2	0	7.65	SV_1	SV_141	0.985611	3.97026	-4.70012	+
3	0	7.65	SV_1	SV_247	1	-6.27667	-3.466	+
4	3.20204	5.68186	SV_115	SV_358	1	5.78121	1.91833	+
5	5.65175	4.89909	SV_123	SV_258	-0.927634	5.76289	-1.92522	-
6	5.60883	-5.10399	SV_13	SV_161	0.942857	0.01083	-6.79999	+
7	5.60883	-5.10399	SV_13	SV_151	0.985611	-7.5361	0.408755	+
8	5.60883	-5.10399	SV_13	SV_111	0.942857	3.34712	-6.70375	+
9	5.61481	5.0729	SV_44	SV_31	1	5.65175	4.72139	+
10	5.61481	5.0729	SV_44	SV_104	0.942857	5.30603	4.12258	+
11	5.61481	5.0729	SV_44	SV_46	1	4.62969	3.97881	+
12	5.61481	5.0729	SV_44	SV_125	0.941124	4.17474	4.24148	+
13	5.61481	5.0729	SV_44	SV_217	0.927634	2.611	-5.42875	+
14	5.61481	5.0729	SV_44	SV_161	0.942857	0.01083	-6.79999	+
15	4.46069	4.03373	SV_203	SV_360	0.927634	-6.49251	1.76068	+
16	4.46069	4.03373	SV_203	SV_337	-0.924062	3.99801	4.54758	-
17	4.0193	-5.10399	SV_102	SV_258	0.941124	5.76289	-1.92522	+
18	-6.85275	1.94975	SV_198	SV_256	0.927634	4.17474	5.379	+
19	2.601	5.4329	SV_54	SV_105	0.927634	6.68952	-3.34355	+
20	2.601	5.4329	SV_54	SV_42	0.927634	-7.08386	2.28457	+
21	2.601	5.4329	SV_54	SV_67	0.927634	5.6596	-3.17168	+
22	2.601	5.4329	SV_54	SV_82	0.927634	NA	NA	+
23	2.601	5.4329	SV_54	SV_117	0.970588	-4.79874	-5.66789	+
24	1.99996	5.68186	SV_224	SV_92	0.970588	NA	NA	+
25	5.30603	5.4979	SV_49	SV_50	0.985611	-1.95644	5.74462	+
26	5.30603	5.4979	SV_49	SV_56	0.941124	NA	NA	+
27	5.30603	5.4979	SV_49	SV_158	0.927634	6.00897	-1.79205	+
28	5.43808	5.379	SV_27	SV_52	1	6.80705	-1.92522	+
29	5.43808	5.379	SV_27	SV_96	0.927634	NA	NA	+
30	5.43808	5.379	SV_27	SV_32	1	-5.49433	2.28457	+
31	5.43808	5.379	SV_27	SV_87	0.927634	-6.08568	1.76068	+
32	5.43808	5.379	SV_27	SV_13	0.942857	5.60883	-5.10399	+
33	5.43808	5.379	SV_27	SV_186	0.942857	NA	NA	+
34	5.43808	5.379	SV_27	SV_151	0.927634	-7.5361	0.408755	+
35	4.62969	3.97881	SV_46	SV_125	0.941124	4.17474	4.24148	+
36	4.62969	3.97881	SV_46	SV_217	0.927634	2.611	-5.42875	+
37	4.62969	3.97881	SV_46	SV_161	0.942857	0.01083	-6.79999	+
38	4.17474	4.24148	SV_125	SV_147	0.954864	-6.27667	-1.766	+
39	4.17474	4.24148	SV_125	SV_157	0.935484	-5.67171	4.79491	+
40	4.17474	4.24148	SV_125	SV_134	0.937958	4.11453	-4.31972	+
41	3.99801	5.0729	SV_451	SV_289	0.92	4.46069	5.58675	+
42	6.28083	3.456	SV_17	SV_26	0.942857	-6.28909	3.43598	+
43	6.28083	3.456	SV_17	SV_88	0.942857	4.80641	3.96024	+
44	6.28083	3.456	SV_17	SV_158	0.927634	6.00897	-1.79205	+
45	6.28083	3.456	SV_17	SV_408	0.941124	4.41905	-4.04994	+
46	6.78044	1.91833	SV_184	SV_72	0.92	-3.44969	6.08544	+
47	6.78044	1.91833	SV_184	SV_451	1	3.99801	5.0729	+
48	6.78044	1.91833	SV_184	SV_289	0.92	4.46069	5.58675	+
49	5.47243	2.86866	SV_167	SV_310	0.942857	4.30679	5.4979	+
50	6.99656	-2.13109	SV_120	SV_65	0.927634	5.5136	-4.31972	+
51	6.99656	-2.13109	SV_120	SV_38	0.985611	7.13206	-2.66618	+
52	6.99656	-2.13109	SV_120	SV_380	0.970588	-6.06386	-0.441245	+
53	6.99656	-2.13109	SV_120	SV_320	0.970588	-6.68411	3.33862	+
54	6.99656	-2.13109	SV_120	SV_158	0.970588	6.00897	-1.79205	+
55	6.91033	-3.17168	SV_24	SV_125	0.924062	4.17474	4.24148	+
56	6.91033	-3.17168	SV_24	SV_147	0.970588	-6.27667	-1.766	+
57	6.91033	-3.17168	SV_24	SV_134	0.985184	4.11453	-4.31972	+
58	5.43787	-2.66618	SV_164	SV_141	0.970588	3.97026	-4.70012	+
59	5.43787	-2.66618	SV_164	SV_247	0.985611	-6.27667	-3.466	+
60	5.46098	-2.38733	SV_278	SV_102	0.941124	4.0193	-5.10399	+
61	5.46098	-2.38733	SV_278	SV_258	0.942857	5.76289	-1.92522	+
62	5.20908	-4.04994	SV_139	SV_79	0.942857	5.15214	4.03373	+
63	5.20908	-4.04994	SV_139	SV_83	0.927634	NA	NA	+
64	5.20908	-4.04994	SV_139	SV_185	1	NA	NA	+
65	5.5136	-4.31972	SV_65	SV_87	0.927634	-6.08568	1.76068	+
66	5.5136	-4.31972	SV_65	SV_128	0.942857	NA	NA	+
67	5.5136	-4.31972	SV_65	SV_280	0.985611	5.57338	-2.13109	+
68	0.01083	-6.79999	SV_161	SV_124	0.942857	-7.5361	-0.441245	+
69	0.01083	-6.79999	SV_161	SV_151	0.927634	-7.5361	0.408755	+
70	-2.59099	-5.43703	SV_3	SV_133	0.942857	-3.0906	-6.9747	+
71	-2.59099	-5.43703	SV_3	SV_128	0.942857	NA	NA	+
72	-2.59099	-5.43703	SV_3	SV_217	0.927634	2.611	-5.42875	+
73	-2.59099	-5.43703	SV_3	SV_280	0.927634	5.57338	-2.13109	+
74	-3.0906	-6.9747	SV_133	SV_39	0.927634	-5.72544	1.94975	+
75	-3.0906	-6.9747	SV_133	SV_87	0.927634	-6.08568	1.76068	+
76	-3.0906	-6.9747	SV_133	SV_24	0.927634	6.91033	-3.17168	+
77	-3.0906	-6.9747	SV_133	SV_217	0.985611	2.611	-5.42875	+
78	-7.5361	0.408755	SV_151	SV_111	0.927634	3.34712	-6.70375	+
79	-5.44529	2.68844	SV_84	SV_96	0.927634	NA	NA	+
80	-5.44529	2.68844	SV_84	SV_13	0.942857	5.60883	-5.10399	+
81	-5.44529	2.68844	SV_84	SV_186	0.942857	NA	NA	+
82	-5.44529	2.68844	SV_84	SV_151	0.927634	-7.5361	0.408755	+
83	-5.44529	2.68844	SV_84	SV_111	1	3.34712	-6.70375	+
84	-5.49433	2.28457	SV_32	SV_87	0.927634	-6.08568	1.76068	+
85	-5.49433	2.28457	SV_32	SV_13	0.942857	5.60883	-5.10399	+
86	-5.49433	2.28457	SV_32	SV_186	0.942857	NA	NA	+
87	-5.49433	2.28457	SV_32	SV_151	0.927634	-7.5361	0.408755	+
88	-1.79231	6.08544	SV_33	SV_48	1	5.54253	4.38524	+
89	-1.79231	6.08544	SV_33	SV_43	0.942857	5.43808	4.24148	+
90	-1.79231	6.08544	SV_33	SV_97	0.942857	-4.79874	-3.96789	+
91	-1.79231	6.08544	SV_33	SV_167	0.942857	5.47243	2.86866	+
92	-1.95644	5.74462	SV_50	SV_38	0.927634	7.13206	-2.66618	+
93	-1.95644	5.74462	SV_50	SV_56	0.954864	NA	NA	+
94	-1.95644	5.74462	SV_50	SV_158	0.941176	6.00897	-1.79205	+
95	3.20204	6.88394	SV_35	SV_17	-0.985611	6.28083	3.456	-
96	3.20204	6.88394	SV_35	SV_26	-0.927634	-6.28909	3.43598	-
97	3.20204	6.88394	SV_35	SV_49	-0.927634	5.30603	5.4979	-
98	3.20204	6.88394	SV_35	SV_88	-0.927634	4.80641	3.96024	-
99	3.20204	6.88394	SV_35	SV_38	-0.927634	7.13206	-2.66618	-
100	3.20204	6.88394	SV_35	SV_158	-0.970588	6.00897	-1.79205	-
101	3.20204	6.88394	SV_35	SV_408	-0.924062	4.41905	-4.04994	-
102	5.30603	4.12258	SV_104	SV_46	0.942857	4.62969	3.97881	+
103	5.30603	4.12258	SV_104	SV_13	0.942857	5.60883	-5.10399	+
104	5.30603	4.12258	SV_104	SV_489	0.927634	NA	NA	+
105	5.30603	4.12258	SV_104	SV_86	0.941124	NA	NA	+
106	5.30603	4.12258	SV_104	SV_161	1	0.01083	-6.79999	+
107	5.30603	4.12258	SV_104	SV_124	0.942857	-7.5361	-0.441245	+
108	5.30603	4.12258	SV_104	SV_151	0.927634	-7.5361	0.408755	+
109	-4.79874	-3.96789	SV_97	SV_310	0.942857	4.30679	5.4979	+
110	-6.06386	-0.441245	SV_380	SV_320	1	-6.68411	3.33862	+
111	-6.06386	-0.441245	SV_380	SV_158	0.941176	6.00897	-1.79205	+
112	5.54253	4.38524	SV_48	SV_43	0.942857	5.43808	4.24148	+
113	5.54253	4.38524	SV_48	SV_97	0.942857	-4.79874	-3.96789	+
114	5.54253	4.38524	SV_48	SV_167	0.942857	5.47243	2.86866	+
115	5.43808	4.24148	SV_43	SV_97	1	-4.79874	-3.96789	+
116	5.43808	4.24148	SV_43	SV_310	0.942857	4.30679	5.4979	+
117	6.14506	-3.4344	SV_77	SV_42	0.942857	-7.08386	2.28457	+
118	6.14506	-3.4344	SV_77	SV_82	0.942857	NA	NA	+
119	4.81407	-3.95258	SV_47	SV_123	-0.927634	5.65175	4.89909	-
120	4.81407	-3.95258	SV_47	SV_278	0.942857	5.46098	-2.38733	+
121	4.81407	-3.95258	SV_47	SV_102	0.941124	4.0193	-5.10399	+
122	4.81407	-3.95258	SV_47	SV_258	1	5.76289	-1.92522	+
123	5.65787	-4.70012	SV_138	SV_125	0.935484	4.17474	4.24148	+
124	5.65787	-4.70012	SV_138	SV_157	1	-5.67171	4.79491	+
125	-5.58956	3.06883	SV_40	SV_127	0.942857	4.98314	3.97881	+
126	-5.58956	3.06883	SV_40	SV_80	1	4.30679	4.12258	+
127	-5.72544	1.94975	SV_39	SV_65	0.927634	5.5136	-4.31972	+
128	-5.72544	1.94975	SV_39	SV_87	0.970588	-6.08568	1.76068	+
129	-5.72544	1.94975	SV_39	SV_128	0.927634	NA	NA	+
130	-5.72544	1.94975	SV_39	SV_217	0.970588	2.611	-5.42875	+
131	-5.72544	1.94975	SV_39	SV_280	0.941176	5.57338	-2.13109	+
132	-6.08568	1.76068	SV_87	SV_217	0.941176	2.611	-5.42875	+
133	-6.49251	1.76068	SV_360	SV_337	-0.941124	3.99801	4.54758	-
134	-6.49251	1.76068	SV_360	SV_147	0.927634	-6.27667	-1.766	+
135	-4.82171	3.94491	SV_211	SV_213	-0.927634	-3.39938	-6.02437	-
136	-4.82171	3.94491	SV_211	SV_336	-0.941124	-3.44969	6.46372	-
137	-4.82171	3.94491	SV_211	SV_437	-0.985611	NA	NA	-
138	4.80641	5.66024	SV_16	SV_23	0.942857	-5.89408	3.33862	+
139	4.80641	5.66024	SV_16	SV_21	0.942857	NA	NA	+
140	4.80641	5.66024	SV_16	SV_77	0.942857	6.14506	-3.4344	+
141	4.80641	5.66024	SV_16	SV_67	0.942857	5.6596	-3.17168	+
142	4.80641	5.66024	SV_16	SV_336	0.941124	-3.44969	6.46372	+
143	4.80641	5.66024	SV_16	SV_117	0.927634	-4.79874	-5.66789	+
144	5.88041	-3.34355	SV_207	SV_446	1	4.25041	-5.43881	+
145	3.97026	-4.70012	SV_141	SV_247	0.985611	-6.27667	-3.466	+
146	-6.27667	-1.766	SV_147	SV_134	0.985184	4.11453	-4.31972	+
147	-6.79998	-0.866245	SV_370	SV_155	-0.924062	-6.98863	3.06883	-
148	-6.79998	-0.866245	SV_370	SV_124	-0.985611	-7.5361	-0.441245	-
149	-6.68411	3.33862	SV_320	SV_158	0.941176	6.00897	-1.79205	+
150	-2.621	7.12458	SV_2	SV_139	0.942857	5.20908	-4.04994	+
151	-2.621	7.12458	SV_2	SV_79	1	5.15214	4.03373	+
152	-2.621	7.12458	SV_2	SV_185	0.942857	NA	NA	+
153	-2.621	7.12458	SV_2	SV_380	0.927634	-6.06386	-0.441245	+
154	-2.621	7.12458	SV_2	SV_320	0.927634	-6.68411	3.33862	+
155	-3.44969	6.08544	SV_72	SV_451	0.92	3.99801	5.0729	+
156	-3.44969	6.08544	SV_72	SV_289	1	4.46069	5.58675	+
157	-6.06386	0.408755	SV_59	SV_30	1	-2.09137	-6.9747	+
158	-6.06386	0.408755	SV_59	SV_120	0.927634	6.99656	-2.13109	+
159	-6.06386	0.408755	SV_59	SV_65	0.942857	5.5136	-4.31972	+
160	-6.06386	0.408755	SV_59	SV_38	0.942857	7.13206	-2.66618	+
161	-3.44969	6.46372	SV_336	SV_437	0.954864	NA	NA	+
162	1.04094977927525e-16	5.95	SV_199	SV_536	1	-3.28555	6.80455	+
163	6.28497	-1.74599	SV_20	SV_37	1	7.08922	2.86866	+
164	6.28497	-1.74599	SV_20	SV_138	0.941124	5.65787	-4.70012	+
165	6.28497	-1.74599	SV_20	SV_157	0.941124	-5.67171	4.79491	+
166	7.13206	-2.66618	SV_38	SV_380	0.927634	-6.06386	-0.441245	+
167	7.13206	-2.66618	SV_38	SV_320	0.927634	-6.68411	3.33862	+
168	7.13206	-2.66618	SV_38	SV_158	0.985611	6.00897	-1.79205	+
169	-3.39938	-6.02437	SV_213	SV_437	0.941176	NA	NA	+
170	-3.39938	-6.02437	SV_213	SV_92	0.941176	NA	NA	+
171	3.451	6.2829	SV_29	SV_73	-0.924062	0.736122	6.375	-
172	3.451	6.2829	SV_29	SV_375	-0.924062	-0.736122	7.225	-
173	7.08922	2.86866	SV_37	SV_138	0.941124	5.65787	-4.70012	+
174	7.08922	2.86866	SV_37	SV_157	0.941124	-5.67171	4.79491	+
175	-6.28909	3.43598	SV_26	SV_88	1	4.80641	3.96024	+
176	-6.28909	3.43598	SV_26	SV_38	0.942857	7.13206	-2.66618	+
177	-6.28909	3.43598	SV_26	SV_158	0.927634	6.00897	-1.79205	+
178	-6.28909	3.43598	SV_26	SV_408	0.941124	4.41905	-4.04994	+
179	-4.22067	4.19387	SV_284	SV_54	0.927634	2.601	5.4329	+
180	-4.22067	4.19387	SV_284	SV_77	0.942857	6.14506	-3.4344	+
181	-4.22067	4.19387	SV_284	SV_42	1	-7.08386	2.28457	+
182	-4.22067	4.19387	SV_284	SV_82	1	NA	NA	+
183	4.98314	5.64167	SV_12	SV_60	0.985611	NA	NA	+
184	4.98314	5.64167	SV_12	SV_310	0.942857	4.30679	5.4979	+
185	5.15214	5.58675	SV_8	SV_34	0.942857	-4.82171	5.64491	+
186	5.15214	5.58675	SV_8	SV_62	0.942857	6.56096	-1.79205	+
187	5.15214	5.58675	SV_8	SV_84	1	-5.44529	2.68844	+
188	5.15214	5.58675	SV_8	SV_96	0.927634	NA	NA	+
189	5.15214	5.58675	SV_8	SV_13	0.942857	5.60883	-5.10399	+
190	5.15214	5.58675	SV_8	SV_186	0.942857	NA	NA	+
191	5.15214	5.58675	SV_8	SV_151	0.927634	-7.5361	0.408755	+
192	5.15214	5.58675	SV_8	SV_111	1	3.34712	-6.70375	+
193	5.15214	4.03373	SV_79	SV_185	0.942857	NA	NA	+
194	5.15214	4.03373	SV_79	SV_380	0.927634	-6.06386	-0.441245	+
195	5.15214	4.03373	SV_79	SV_320	0.927634	-6.68411	3.33862	+
196	4.98314	3.97881	SV_127	SV_80	0.942857	4.30679	4.12258	+
197	4.98314	3.97881	SV_127	SV_13	0.942857	5.60883	-5.10399	+
198	4.98314	3.97881	SV_127	SV_256	0.927634	4.17474	5.379	+
199	7.06338	-2.93743	SV_190	SV_284	0.927634	-4.22067	4.19387	+
200	7.06338	-2.93743	SV_190	SV_138	0.954864	5.65787	-4.70012	+
201	7.06338	-2.93743	SV_190	SV_42	0.927634	-7.08386	2.28457	+
202	7.06338	-2.93743	SV_190	SV_82	0.927634	NA	NA	+
203	7.06338	-2.93743	SV_190	SV_157	0.954864	-5.67171	4.79491	+
204	6.68952	-3.34355	SV_105	SV_77	0.942857	6.14506	-3.4344	+
205	6.68952	-3.34355	SV_105	SV_67	0.942857	5.6596	-3.17168	+
206	6.68952	-3.34355	SV_105	SV_117	0.927634	-4.79874	-5.66789	+
207	-6.79998	0.833755	SV_9	SV_59	1	-6.06386	0.408755	+
208	-6.79998	0.833755	SV_9	SV_30	1	-2.09137	-6.9747	+
209	-6.79998	0.833755	SV_9	SV_120	0.927634	6.99656	-2.13109	+
210	-6.79998	0.833755	SV_9	SV_65	0.942857	5.5136	-4.31972	+
211	-6.79998	0.833755	SV_9	SV_38	0.942857	7.13206	-2.66618	+
212	-5.89408	3.33862	SV_23	SV_18	0.942857	-1.78259	-6.02437	+
213	-5.89408	3.33862	SV_23	SV_54	0.927634	2.601	5.4329	+
214	-5.89408	3.33862	SV_23	SV_105	0.942857	6.68952	-3.34355	+
215	-5.89408	3.33862	SV_23	SV_67	1	5.6596	-3.17168	+
216	-5.89408	3.33862	SV_23	SV_117	0.985611	-4.79874	-5.66789	+
217	-3.97171	4.79491	SV_57	SV_489	0.985611	NA	NA	+
218	-3.97171	4.79491	SV_57	SV_370	-0.927634	-6.79998	-0.866245	-
219	-3.97171	4.79491	SV_57	SV_124	0.942857	-7.5361	-0.441245	+
220	-1.95644	6.80455	SV_4	SV_19	0.942857	NA	NA	+
221	-1.95644	6.80455	SV_4	SV_104	0.942857	5.30603	4.12258	+
222	-1.95644	6.80455	SV_4	SV_57	0.942857	-3.97171	4.79491	+
223	-1.95644	6.80455	SV_4	SV_489	0.985611	NA	NA	+
224	-1.95644	6.80455	SV_4	SV_370	-0.985611	-6.79998	-0.866245	-
225	-1.95644	6.80455	SV_4	SV_161	0.942857	0.01083	-6.79999	+
226	-1.95644	6.80455	SV_4	SV_124	1	-7.5361	-0.441245	+
227	5.65175	4.72139	SV_31	SV_104	0.942857	5.30603	4.12258	+
228	5.65175	4.72139	SV_31	SV_46	1	4.62969	3.97881	+
229	5.65175	4.72139	SV_31	SV_125	0.941124	4.17474	4.24148	+
230	5.65175	4.72139	SV_31	SV_217	0.927634	2.611	-5.42875	+
231	5.65175	4.72139	SV_31	SV_161	0.942857	0.01083	-6.79999	+
232	4.80641	3.96024	SV_88	SV_38	0.942857	7.13206	-2.66618	+
233	4.80641	3.96024	SV_88	SV_158	0.927634	6.00897	-1.79205	+
234	4.80641	3.96024	SV_88	SV_408	0.941124	4.41905	-4.04994	+
235	6.80705	-1.92522	SV_52	SV_96	0.927634	NA	NA	+
236	6.80705	-1.92522	SV_52	SV_32	1	-5.49433	2.28457	+
237	6.80705	-1.92522	SV_52	SV_87	0.927634	-6.08568	1.76068	+
238	6.80705	-1.92522	SV_52	SV_13	0.942857	5.60883	-5.10399	+
239	6.80705	-1.92522	SV_52	SV_186	0.942857	NA	NA	+
240	6.80705	-1.92522	SV_52	SV_151	0.927634	-7.5361	0.408755	+
241	-1.78259	-6.02437	SV_18	SV_128	0.942857	NA	NA	+
242	-1.78259	-6.02437	SV_18	SV_54	0.927634	2.601	5.4329	+
243	-1.78259	-6.02437	SV_18	SV_105	1	6.68952	-3.34355	+
244	-1.78259	-6.02437	SV_18	SV_77	0.942857	6.14506	-3.4344	+
245	-1.78259	-6.02437	SV_18	SV_67	0.942857	5.6596	-3.17168	+
246	-1.78259	-6.02437	SV_18	SV_117	0.927634	-4.79874	-5.66789	+
247	-2.09137	-6.9747	SV_30	SV_120	0.927634	6.99656	-2.13109	+
248	-2.09137	-6.9747	SV_30	SV_65	0.942857	5.5136	-4.31972	+
249	-2.09137	-6.9747	SV_30	SV_38	0.942857	7.13206	-2.66618	+
250	-7.08386	2.28457	SV_42	SV_82	1	NA	NA	+
251	0.736122	7.225	SV_5	SV_78	-0.941124	-2.9898	5.50876	-
252	0.736122	7.225	SV_5	SV_240	0.941124	6.42487	-3.4344	+
253	0.736122	7.225	SV_5	SV_353	0.935484	4.62969	5.64167	+
254	0.736122	6.375	SV_73	SV_375	1	-0.736122	7.225	+
255	1.751	6.2829	SV_425	SV_447	1	1.99996	6.88394	+
256	3.96107	4.89909	SV_162	SV_56	0.935484	NA	NA	+
257	6.56096	-1.79205	SV_62	SV_84	0.942857	-5.44529	2.68844	+
258	6.56096	-1.79205	SV_62	SV_27	0.942857	5.43808	5.379	+
259	6.56096	-1.79205	SV_62	SV_52	0.942857	6.80705	-1.92522	+
260	6.56096	-1.79205	SV_62	SV_104	0.942857	5.30603	4.12258	+
261	6.56096	-1.79205	SV_62	SV_32	0.942857	-5.49433	2.28457	+
262	6.56096	-1.79205	SV_62	SV_127	0.942857	4.98314	3.97881	+
263	6.56096	-1.79205	SV_62	SV_13	1	5.60883	-5.10399	+
264	6.56096	-1.79205	SV_62	SV_161	0.942857	0.01083	-6.79999	+
265	6.56096	-1.79205	SV_62	SV_151	0.985611	-7.5361	0.408755	+
266	6.56096	-1.79205	SV_62	SV_111	0.942857	3.34712	-6.70375	+
267	5.6596	-3.17168	SV_67	SV_117	0.985611	-4.79874	-5.66789	+
268	-4.82171	5.64491	SV_34	SV_84	0.942857	-5.44529	2.68844	+
269	-4.82171	5.64491	SV_34	SV_27	0.942857	5.43808	5.379	+
270	-4.82171	5.64491	SV_34	SV_52	0.942857	6.80705	-1.92522	+
271	-4.82171	5.64491	SV_34	SV_96	0.985611	NA	NA	+
272	-4.82171	5.64491	SV_34	SV_32	0.942857	-5.49433	2.28457	+
273	-4.82171	5.64491	SV_34	SV_186	1	NA	NA	+
274	-4.82171	5.64491	SV_34	SV_111	0.942857	3.34712	-6.70375	+
275	NA	NA	SV_15	SV_74	1	NA	NA	+
276	NA	NA	SV_15	SV_44	0.942857	5.61481	5.0729	+
277	NA	NA	SV_15	SV_31	0.942857	5.65175	4.72139	+
278	NA	NA	SV_15	SV_133	0.942857	-3.0906	-6.9747	+
279	NA	NA	SV_15	SV_39	0.985611	-5.72544	1.94975	+
280	NA	NA	SV_15	SV_46	0.942857	4.62969	3.97881	+
281	NA	NA	SV_15	SV_87	0.927634	-6.08568	1.76068	+
282	NA	NA	SV_15	SV_128	0.942857	NA	NA	+
283	NA	NA	SV_15	SV_217	0.985611	2.611	-5.42875	+
284	NA	NA	SV_15	SV_280	0.927634	5.57338	-2.13109	+
285	NA	NA	SV_19	SV_21	0.942857	NA	NA	+
286	NA	NA	SV_19	SV_489	0.927634	NA	NA	+
287	NA	NA	SV_19	SV_370	-0.985611	-6.79998	-0.866245	-
288	NA	NA	SV_19	SV_155	0.941124	-6.98863	3.06883	+
289	NA	NA	SV_19	SV_124	0.942857	-7.5361	-0.441245	+
290	NA	NA	SV_53	SV_224	0.927634	1.99996	5.68186	+
291	NA	NA	SV_53	SV_56	0.941124	NA	NA	+
292	NA	NA	SV_53	SV_92	0.927634	NA	NA	+
293	NA	NA	SV_21	SV_43	0.942857	5.43808	4.24148	+
294	NA	NA	SV_21	SV_97	0.942857	-4.79874	-3.96789	+
295	NA	NA	SV_74	SV_44	0.942857	5.61481	5.0729	+
296	NA	NA	SV_74	SV_31	0.942857	5.65175	4.72139	+
297	NA	NA	SV_74	SV_133	0.942857	-3.0906	-6.9747	+
298	NA	NA	SV_74	SV_39	0.985611	-5.72544	1.94975	+
299	NA	NA	SV_74	SV_46	0.942857	4.62969	3.97881	+
300	NA	NA	SV_74	SV_87	0.927634	-6.08568	1.76068	+
301	NA	NA	SV_74	SV_128	0.942857	NA	NA	+
302	NA	NA	SV_74	SV_217	0.985611	2.611	-5.42875	+
303	NA	NA	SV_74	SV_280	0.927634	5.57338	-2.13109	+
304	NA	NA	SV_69	SV_83	0.927634	NA	NA	+
305	NA	NA	SV_69	SV_271	0.985611	4.61065	-5.62788	+
306	NA	NA	SV_96	SV_32	0.927634	-5.49433	2.28457	+
307	NA	NA	SV_96	SV_186	0.985611	NA	NA	+
308	NA	NA	SV_96	SV_111	0.927634	3.34712	-6.70375	+
309	NA	NA	SV_118	SV_206	0.92	-3.28555	5.74462	+
310	NA	NA	SV_83	SV_271	0.941176	4.61065	-5.62788	+
311	NA	NA	SV_83	SV_185	0.927634	NA	NA	+
312	NA	NA	SV_83	SV_380	0.941176	-6.06386	-0.441245	+
313	NA	NA	SV_83	SV_320	0.941176	-6.68411	3.33862	+
314	NA	NA	SV_128	SV_105	0.942857	6.68952	-3.34355	+
315	NA	NA	SV_128	SV_217	0.927634	2.611	-5.42875	+
316	NA	NA	SV_128	SV_280	0.985611	5.57338	-2.13109	+
317	NA	NA	SV_126	SV_278	0.942857	5.46098	-2.38733	+
318	NA	NA	SV_194	SV_516	1	NA	NA	+
319	NA	NA	SV_194	SV_520	0.92	1.87488	-6.70375	+
320	NA	NA	SV_186	SV_111	0.942857	3.34712	-6.70375	+
321	NA	NA	SV_489	SV_370	-0.970588	-6.79998	-0.866245	-
322	NA	NA	SV_489	SV_161	0.927634	0.01083	-6.79999	+
323	NA	NA	SV_489	SV_124	0.985611	-7.5361	-0.441245	+
324	NA	NA	SV_516	SV_520	0.92	1.87488	-6.70375	+
325	NA	NA	SV_86	SV_161	0.941124	0.01083	-6.79999	+

## Sheet: edge_data_18S_net_May
	X2	Y2	OTU_2	OTU_1	weight	X1	Y1	cor
1	0.470226	7.12023	SV_10	SV_53	0.942857	-4.81462	3.56169	+
2	0.470226	7.12023	SV_10	SV_20	0.942857	4.57577	-5.29482	+
3	0.470226	7.12023	SV_10	SV_31	0.942857	5.98708	3.64421	+
4	0.470226	7.12023	SV_10	SV_52	0.942857	4.58008	-5.40176	+
5	0.470226	7.12023	SV_10	SV_123	0.927634	NA	NA	+
6	0.665	6.65	SV_25	SV_73	-0.924062	-0.470226	6.17977	-
7	3.61853	4.78206	SV_54	SV_71	0.942857	-1.49818	5.98578	+
8	3.61853	4.78206	SV_54	SV_98	0.941124	-0.470226	7.12023	+
9	3.61853	4.78206	SV_54	SV_32	1	-6.48889	1.39316	+
10	3.61853	4.78206	SV_54	SV_149	0.942857	NA	NA	+
11	3.61853	4.78206	SV_54	SV_293	0.942857	NA	NA	+
12	5.6946	3.32649	SV_48	SV_185	0.927634	5.16217	4.54031	+
13	4.55437	-5.18996	SV_70	SV_27	0.942857	6.04082	3.85643	+
14	4.55437	-5.18996	SV_70	SV_69	0.942857	NA	NA	+
15	4.55437	-5.18996	SV_70	SV_268	0.942857	-5.96643	3.56169	+
16	4.55437	-5.18996	SV_70	SV_220	1	0.0105911	-7.31499	+
17	4.55437	-5.18996	SV_70	SV_97	0.942857	NA	NA	+
18	4.55437	-5.18996	SV_70	SV_137	0.985611	3.29384	-5.61079	+
19	4.55437	-5.18996	SV_70	SV_43	0.942857	NA	NA	+
20	4.55437	-5.18996	SV_70	SV_287	0.927634	3.25116	-5.40176	+
21	4.55437	-5.18996	SV_70	SV_96	1	4.73344	4.07459	+
22	4.55437	-5.18996	SV_70	SV_104	0.927634	4.82138	4.27506	+
23	4.55437	-5.18996	SV_70	SV_209	0.942857	3.36834	-4.99722	+
24	4.55437	-5.18996	SV_70	SV_159	0.985611	-0.654409	-6.64999	+
25	4.58008	-5.40176	SV_52	SV_147	0.942857	-6.31993	-1.40406	+
26	4.58008	-5.40176	SV_52	SV_306	0.942857	NA	NA	+
27	4.58008	-5.40176	SV_52	SV_36	0.942857	2.05396	6.32485	+
28	4.58008	-5.40176	SV_52	SV_120	0.942857	3.40051	-5.79555	+
29	4.58008	-5.40176	SV_52	SV_128	0.942857	NA	NA	+
30	-1.46797	-6.66062	SV_30	SV_73	0.941124	-0.470226	6.17977	+
31	-1.46797	-6.66062	SV_30	SV_50	0.985611	-4.11153	4.73067	+
32	-1.46797	-6.66062	SV_30	SV_162	0.942857	4.88884	3.46095	+
33	-1.46797	-6.66062	SV_30	SV_194	1	1.48812	-5.98907	+
34	-1.46797	-6.66062	SV_30	SV_185	0.942857	5.16217	4.54031	+
35	-6.32974	2.70384	SV_42	SV_45	0.942857	NA	NA	+
36	-6.32974	2.70384	SV_42	SV_24	1	4.0223	-4.71859	+
37	-6.32974	2.70384	SV_42	SV_8	1	5.78655	4.43612	+
38	-6.32974	2.70384	SV_42	SV_41	1	4.22466	-4.78615	+
39	-6.32974	2.70384	SV_42	SV_15	0.942857	NA	NA	+
40	-6.32974	2.70384	SV_42	SV_68	1	4.31512	-4.84335	+
41	-6.32974	2.70384	SV_42	SV_60	0.942857	4.39522	-4.91432	+
42	-6.32974	2.70384	SV_42	SV_106	0.942857	-2.04388	-6.99312	+
43	-6.32974	2.70384	SV_42	SV_70	0.942857	4.55437	-5.18996	+
44	-6.32974	2.70384	SV_42	SV_225	0.927634	4.3566	-5.87274	+
45	-6.32974	2.70384	SV_42	SV_147	0.942857	-6.31993	-1.40406	+
46	-6.32974	2.70384	SV_42	SV_220	0.942857	0.0105911	-7.31499	+
47	-6.32974	2.70384	SV_42	SV_137	0.927634	3.29384	-5.61079	+
48	-6.32974	2.70384	SV_42	SV_43	1	NA	NA	+
49	-6.32974	2.70384	SV_42	SV_96	0.942857	4.73344	4.07459	+
50	-6.32974	2.70384	SV_42	SV_209	1	3.36834	-4.99722	+
51	-6.32974	2.70384	SV_42	SV_159	0.927634	-0.654409	-6.64999	+
52	2.05396	6.32485	SV_36	SV_120	1	3.40051	-5.79555	+
53	2.05396	6.32485	SV_36	SV_123	0.927634	NA	NA	+
54	2.05396	6.32485	SV_36	SV_128	1	NA	NA	+
55	4.19559	4.78206	SV_35	SV_79	-0.985611	NA	NA	-
56	4.19559	4.78206	SV_35	SV_283	-0.924062	NA	NA	-
57	-2.04388	-6.99312	SV_106	SV_52	0.942857	4.58008	-5.40176	+
58	-2.04388	-6.99312	SV_106	SV_268	0.942857	-5.96643	3.56169	+
59	-2.04388	-6.99312	SV_106	SV_43	0.942857	NA	NA	+
60	-2.04388	-6.99312	SV_106	SV_369	0.927634	NA	NA	+
61	-2.04388	-6.99312	SV_106	SV_209	0.942857	3.36834	-4.99722	+
62	5.78655	4.43612	SV_8	SV_41	1	4.22466	-4.78615	+
63	5.78655	4.43612	SV_8	SV_15	0.942857	NA	NA	+
64	5.78655	4.43612	SV_8	SV_68	1	4.31512	-4.84335	+
65	5.78655	4.43612	SV_8	SV_60	0.942857	4.39522	-4.91432	+
66	5.78655	4.43612	SV_8	SV_106	0.942857	-2.04388	-6.99312	+
67	5.78655	4.43612	SV_8	SV_70	0.942857	4.55437	-5.18996	+
68	5.78655	4.43612	SV_8	SV_225	0.927634	4.3566	-5.87274	+
69	5.78655	4.43612	SV_8	SV_147	0.942857	-6.31993	-1.40406	+
70	5.78655	4.43612	SV_8	SV_220	0.942857	0.0105911	-7.31499	+
71	5.78655	4.43612	SV_8	SV_137	0.927634	3.29384	-5.61079	+
72	5.78655	4.43612	SV_8	SV_43	1	NA	NA	+
73	5.78655	4.43612	SV_8	SV_96	0.942857	4.73344	4.07459	+
74	5.78655	4.43612	SV_8	SV_209	1	3.36834	-4.99722	+
75	5.78655	4.43612	SV_8	SV_159	0.927634	-0.654409	-6.64999	+
76	4.88884	3.46095	SV_162	SV_194	0.942857	1.48812	-5.98907	+
77	4.88884	3.46095	SV_162	SV_307	0.927634	6.65	0.00529557	+
78	4.39522	-4.91432	SV_60	SV_74	0.942857	NA	NA	+
79	4.39522	-4.91432	SV_60	SV_168	0.942857	5.38432	-3.90277	+
80	4.39522	-4.91432	SV_60	SV_225	0.985611	4.3566	-5.87274	+
81	4.39522	-4.91432	SV_60	SV_67	0.942857	4.17628	-5.98676	+
82	4.39522	-4.91432	SV_60	SV_43	0.942857	NA	NA	+
83	4.39522	-4.91432	SV_60	SV_104	0.927634	4.82138	4.27506	+
84	4.39522	-4.91432	SV_60	SV_209	0.942857	3.36834	-4.99722	+
85	4.56718	-5.508	SV_112	SV_105	1	4.43074	-5.79555	+
86	4.56718	-5.508	SV_112	SV_97	0.942857	NA	NA	+
87	4.56718	-5.508	SV_112	SV_109	0.927634	-4.28371	5.92817	+
88	4.56718	-5.508	SV_112	SV_287	0.927634	3.25116	-5.40176	+
89	4.56718	-5.508	SV_112	SV_156	0.942857	3.27688	-5.18996	+
90	4.56718	-5.508	SV_112	SV_302	0.942857	3.31483	-5.0899	+
91	4.3566	-5.87274	SV_225	SV_43	0.927634	NA	NA	+
92	4.3566	-5.87274	SV_225	SV_104	0.941176	4.82138	4.27506	+
93	4.3566	-5.87274	SV_225	SV_209	0.927634	3.36834	-4.99722	+
94	4.17628	-5.98676	SV_67	SV_198	0.942857	-6.1706	1.39316	+
95	3.5602	-5.93703	SV_349	SV_477	0.92	3.80895	-4.71859	+
96	3.25116	-5.40176	SV_287	SV_96	0.927634	4.73344	4.07459	+
97	3.25116	-5.40176	SV_287	SV_420	0.927634	3.51613	-4.84335	+
98	3.25116	-5.40176	SV_287	SV_207	0.941176	3.60658	-4.78615	+
99	3.25116	-5.40176	SV_287	SV_159	0.941176	-0.654409	-6.64999	+
100	2.63993	-5.98907	SV_138	SV_247	1	-6.31993	-2.73406	+
101	2.63993	-5.98907	SV_138	SV_113	1	NA	NA	+
102	2.63993	-5.98907	SV_138	SV_88	1	4.76911	3.64421	+
103	2.63993	-5.98907	SV_138	SV_122	0.927634	-6.95153	1.80303	+
104	2.63993	-5.98907	SV_138	SV_156	0.942857	3.27688	-5.18996	+
105	-5.88877	1.54108	SV_23	SV_395	0.985611	3.25547	-5.29482	+
106	-6.95153	1.80303	SV_122	SV_156	0.985611	3.27688	-5.18996	+
107	-6.95153	1.80303	SV_122	SV_293	0.927634	NA	NA	+
108	-3.92418	6.03374	SV_2	SV_9	0.942857	-6.64998	0.649113	+
109	-4.28371	5.92817	SV_109	SV_302	0.985611	3.31483	-5.0899	+
110	-4.28371	5.92817	SV_109	SV_143	0.954864	3.70504	-4.7442	+
111	-0.470226	7.12023	SV_98	SV_32	0.941124	-6.48889	1.39316	+
112	-2.07409	6.98328	SV_100	SV_92	0.942857	NA	NA	+
113	-2.07409	6.98328	SV_100	SV_109	0.927634	-4.28371	5.92817	+
114	-2.07409	6.98328	SV_100	SV_104	0.927634	4.82138	4.27506	+
115	3.26406	-5.508	SV_170	SV_287	0.927634	3.25116	-5.40176	+
116	3.26406	-5.508	SV_170	SV_420	1	3.51613	-4.84335	+
117	3.26406	-5.508	SV_170	SV_207	0.985611	3.60658	-4.78615	+
118	3.29384	-5.61079	SV_137	SV_43	0.927634	NA	NA	+
119	3.29384	-5.61079	SV_137	SV_287	0.941176	3.25116	-5.40176	+
120	3.29384	-5.61079	SV_137	SV_96	0.985611	4.73344	4.07459	+
121	3.29384	-5.61079	SV_137	SV_104	0.941176	4.82138	4.27506	+
122	3.29384	-5.61079	SV_137	SV_209	0.927634	3.36834	-4.99722	+
123	3.29384	-5.61079	SV_137	SV_159	1	-0.654409	-6.64999	+
124	5.37809	4.57634	SV_21	SV_30	0.942857	-1.46797	-6.66062	+
125	5.37809	4.57634	SV_21	SV_50	0.927634	-4.11153	4.73067	+
126	5.37809	4.57634	SV_21	SV_194	0.942857	1.48812	-5.98907	+
127	6.02275	4.07459	SV_49	SV_138	1	2.63993	-5.98907	+
128	6.02275	4.07459	SV_49	SV_247	1	-6.31993	-2.73406	+
129	6.02275	4.07459	SV_49	SV_113	1	NA	NA	+
130	6.02275	4.07459	SV_49	SV_88	1	4.76911	3.64421	+
131	6.02275	4.07459	SV_49	SV_122	0.927634	-6.95153	1.80303	+
132	6.02275	4.07459	SV_49	SV_156	0.942857	3.27688	-5.18996	+
133	6.04082	3.85643	SV_27	SV_69	1	NA	NA	+
134	6.04082	3.85643	SV_27	SV_112	0.942857	4.56718	-5.508	+
135	6.04082	3.85643	SV_27	SV_105	0.942857	4.43074	-5.79555	+
136	6.04082	3.85643	SV_27	SV_220	0.942857	0.0105911	-7.31499	+
137	6.04082	3.85643	SV_27	SV_76	0.942857	-4.52908	5.64499	+
138	6.04082	3.85643	SV_27	SV_97	1	NA	NA	+
139	6.04082	3.85643	SV_27	SV_137	0.927634	3.29384	-5.61079	+
140	6.04082	3.85643	SV_27	SV_170	0.942857	3.26406	-5.508	+
141	6.04082	3.85643	SV_27	SV_287	0.985611	3.25116	-5.40176	+
142	6.04082	3.85643	SV_27	SV_96	0.942857	4.73344	4.07459	+
143	6.04082	3.85643	SV_27	SV_420	0.942857	3.51613	-4.84335	+
144	6.04082	3.85643	SV_27	SV_207	0.927634	3.60658	-4.78615	+
145	6.04082	3.85643	SV_27	SV_159	0.927634	-0.654409	-6.64999	+
146	4.76911	3.64421	SV_88	SV_122	0.927634	-6.95153	1.80303	+
147	4.76911	3.64421	SV_88	SV_156	0.942857	3.27688	-5.18996	+
148	4.73344	4.07459	SV_96	SV_104	0.927634	4.82138	4.27506	+
149	4.73344	4.07459	SV_96	SV_209	0.942857	3.36834	-4.99722	+
150	4.73344	4.07459	SV_96	SV_159	0.985611	-0.654409	-6.64999	+
151	4.82138	4.27506	SV_104	SV_159	0.941176	-0.654409	-6.64999	+
152	6.32649	-2.04892	SV_259	SV_401	0.927634	NA	NA	+
153	4.0223	-4.71859	SV_24	SV_8	1	5.78655	4.43612	+
154	4.0223	-4.71859	SV_24	SV_41	1	4.22466	-4.78615	+
155	4.0223	-4.71859	SV_24	SV_15	0.942857	NA	NA	+
156	4.0223	-4.71859	SV_24	SV_68	1	4.31512	-4.84335	+
157	4.0223	-4.71859	SV_24	SV_60	0.942857	4.39522	-4.91432	+
158	4.0223	-4.71859	SV_24	SV_106	0.942857	-2.04388	-6.99312	+
159	4.0223	-4.71859	SV_24	SV_70	0.942857	4.55437	-5.18996	+
160	4.0223	-4.71859	SV_24	SV_225	0.927634	4.3566	-5.87274	+
161	4.0223	-4.71859	SV_24	SV_147	0.942857	-6.31993	-1.40406	+
162	4.0223	-4.71859	SV_24	SV_220	0.942857	0.0105911	-7.31499	+
163	4.0223	-4.71859	SV_24	SV_137	0.927634	3.29384	-5.61079	+
164	4.0223	-4.71859	SV_24	SV_43	1	NA	NA	+
165	4.0223	-4.71859	SV_24	SV_96	0.942857	4.73344	4.07459	+
166	4.0223	-4.71859	SV_24	SV_209	1	3.36834	-4.99722	+
167	4.0223	-4.71859	SV_24	SV_159	0.927634	-0.654409	-6.64999	+
168	4.22466	-4.78615	SV_41	SV_15	0.942857	NA	NA	+
169	4.22466	-4.78615	SV_41	SV_68	1	4.31512	-4.84335	+
170	4.22466	-4.78615	SV_41	SV_60	0.942857	4.39522	-4.91432	+
171	4.22466	-4.78615	SV_41	SV_106	0.942857	-2.04388	-6.99312	+
172	4.22466	-4.78615	SV_41	SV_70	0.942857	4.55437	-5.18996	+
173	4.22466	-4.78615	SV_41	SV_225	0.927634	4.3566	-5.87274	+
174	4.22466	-4.78615	SV_41	SV_147	0.942857	-6.31993	-1.40406	+
175	4.22466	-4.78615	SV_41	SV_220	0.942857	0.0105911	-7.31499	+
176	4.22466	-4.78615	SV_41	SV_137	0.927634	3.29384	-5.61079	+
177	4.22466	-4.78615	SV_41	SV_43	1	NA	NA	+
178	4.22466	-4.78615	SV_41	SV_96	0.942857	4.73344	4.07459	+
179	4.22466	-4.78615	SV_41	SV_209	1	3.36834	-4.99722	+
180	4.22466	-4.78615	SV_41	SV_159	0.927634	-0.654409	-6.64999	+
181	4.46291	-4.99722	SV_89	SV_16	0.942857	5.86735	3.46095	+
182	4.27104	-5.93703	SV_282	SV_212	0.942857	NA	NA	+
183	3.31483	-5.0899	SV_302	SV_293	0.942857	NA	NA	+
184	3.31483	-5.0899	SV_302	SV_143	0.941124	3.70504	-4.7442	+
185	3.36834	-4.99722	SV_209	SV_159	0.927634	-0.654409	-6.64999	+
186	3.51613	-4.84335	SV_420	SV_207	0.985611	3.60658	-4.78615	+
187	1.48812	-5.98907	SV_194	SV_185	0.942857	5.16217	4.54031	+
188	-1.46797	-5.99562	SV_18	SV_12	0.942857	NA	NA	+
189	-1.46797	-5.99562	SV_18	SV_19	0.942857	NA	NA	+
190	-1.46797	-5.99562	SV_18	SV_75	0.942857	4.55539	5.23323	+
191	-1.46797	-5.99562	SV_18	SV_70	0.942857	4.55437	-5.18996	+
192	-1.46797	-5.99562	SV_18	SV_27	1	6.04082	3.85643	+
193	-1.46797	-5.99562	SV_18	SV_69	1	NA	NA	+
194	-1.46797	-5.99562	SV_18	SV_112	0.942857	4.56718	-5.508	+
195	-1.46797	-5.99562	SV_18	SV_105	0.942857	4.43074	-5.79555	+
196	-1.46797	-5.99562	SV_18	SV_220	0.942857	0.0105911	-7.31499	+
197	-1.46797	-5.99562	SV_18	SV_76	0.942857	-4.52908	5.64499	+
198	-1.46797	-5.99562	SV_18	SV_97	1	NA	NA	+
199	-1.46797	-5.99562	SV_18	SV_137	0.927634	3.29384	-5.61079	+
200	-1.46797	-5.99562	SV_18	SV_170	0.942857	3.26406	-5.508	+
201	-1.46797	-5.99562	SV_18	SV_287	0.985611	3.25116	-5.40176	+
202	-1.46797	-5.99562	SV_18	SV_96	0.942857	4.73344	4.07459	+
203	-1.46797	-5.99562	SV_18	SV_420	0.942857	3.51613	-4.84335	+
204	-1.46797	-5.99562	SV_18	SV_207	0.927634	3.60658	-4.78615	+
205	-1.46797	-5.99562	SV_18	SV_159	0.927634	-0.654409	-6.64999	+
206	-6.31993	-2.73406	SV_247	SV_113	1	NA	NA	+
207	-6.31993	-2.73406	SV_247	SV_88	1	4.76911	3.64421	+
208	-6.31993	-2.73406	SV_247	SV_122	0.927634	-6.95153	1.80303	+
209	-6.31993	-2.73406	SV_247	SV_156	0.942857	3.27688	-5.18996	+
210	-5.78246	2.4166	SV_39	SV_93	0.942857	4.51642	-5.0899	+
211	-5.78246	2.4166	SV_39	SV_112	0.942857	4.56718	-5.508	+
212	-5.78246	2.4166	SV_39	SV_105	0.942857	4.43074	-5.79555	+
213	-5.78246	2.4166	SV_39	SV_71	0.942857	-1.49818	5.98578	+
214	-5.78246	2.4166	SV_39	SV_92	0.942857	NA	NA	+
215	-5.78246	2.4166	SV_39	SV_109	0.985611	-4.28371	5.92817	+
216	-5.78246	2.4166	SV_39	SV_302	1	3.31483	-5.0899	+
217	-5.78246	2.4166	SV_39	SV_293	0.942857	NA	NA	+
218	-5.78246	2.4166	SV_39	SV_143	0.941124	3.70504	-4.7442	+
219	-5.66959	2.119	SV_87	SV_122	0.985611	-6.95153	1.80303	+
220	-5.66959	2.119	SV_87	SV_156	0.942857	3.27688	-5.18996	+
221	-4.81462	3.56169	SV_53	SV_31	1	5.98708	3.64421	+
222	-4.81462	3.56169	SV_53	SV_147	0.942857	-6.31993	-1.40406	+
223	-4.81462	3.56169	SV_53	SV_170	0.942857	3.26406	-5.508	+
224	-4.81462	3.56169	SV_53	SV_420	0.942857	3.51613	-4.84335	+
225	-4.81462	3.56169	SV_53	SV_207	0.927634	3.60658	-4.78615	+
226	-3.26595	5.2741	SV_33	SV_54	0.927634	3.61853	4.78206	+
227	-3.26595	5.2741	SV_33	SV_282	0.927634	4.27104	-5.93703	+
228	-3.26595	5.2741	SV_33	SV_32	0.927634	-6.48889	1.39316	+
229	-3.26595	5.2741	SV_33	SV_212	0.927634	NA	NA	+
230	-3.26595	5.2741	SV_33	SV_149	0.985611	NA	NA	+
231	-3.42161	4.93325	SV_72	SV_20	0.942857	4.57577	-5.29482	+
232	-3.42161	4.93325	SV_72	SV_52	0.942857	4.58008	-5.40176	+
233	-3.42161	4.93325	SV_72	SV_306	1	NA	NA	+
234	-3.42161	4.93325	SV_72	SV_36	1	2.05396	6.32485	+
235	-3.42161	4.93325	SV_72	SV_120	1	3.40051	-5.79555	+
236	-3.42161	4.93325	SV_72	SV_123	0.927634	NA	NA	+
237	-3.42161	4.93325	SV_72	SV_128	1	NA	NA	+
238	-4.42675	4.93325	SV_11	SV_63	0.954864	5.48755	3.25541	+
239	-4.42675	4.93325	SV_11	SV_134	0.941124	2.63993	-6.65407	+
240	-4.52908	5.64499	SV_76	SV_97	0.942857	NA	NA	+
241	-4.52908	5.64499	SV_76	SV_369	0.927634	NA	NA	+
242	5.98708	3.64421	SV_31	SV_147	0.942857	-6.31993	-1.40406	+
243	5.98708	3.64421	SV_31	SV_170	0.942857	3.26406	-5.508	+
244	5.98708	3.64421	SV_31	SV_420	0.942857	3.51613	-4.84335	+
245	5.98708	3.64421	SV_31	SV_207	0.927634	3.60658	-4.78615	+
246	4.51642	-5.0899	SV_93	SV_100	0.942857	-2.07409	6.98328	+
247	4.51642	-5.0899	SV_93	SV_145	0.942857	3.86211	-6.03782	+
248	4.51642	-5.0899	SV_93	SV_109	0.927634	-4.28371	5.92817	+
249	4.51642	-5.0899	SV_93	SV_302	0.942857	3.31483	-5.0899	+
250	4.51642	-5.0899	SV_93	SV_104	0.927634	4.82138	4.27506	+
251	3.27688	-5.18996	SV_156	SV_293	0.942857	NA	NA	+
252	-4.11153	4.73067	SV_50	SV_162	0.927634	4.88884	3.46095	+
253	-4.11153	4.73067	SV_50	SV_194	0.985611	1.48812	-5.98907	+
254	4.12621	-4.7442	SV_66	SV_116	0.927634	NA	NA	+
255	4.12621	-4.7442	SV_66	SV_62	0.927634	3.47465	-5.87274	+
256	-6.31993	-1.40406	SV_147	SV_297	0.942857	3.33972	-5.70748	+
257	-6.31993	-1.40406	SV_147	SV_43	0.942857	NA	NA	+
258	-6.31993	-1.40406	SV_147	SV_209	0.942857	3.36834	-4.99722	+
259	-0.470226	6.17977	SV_73	SV_50	0.954864	-4.11153	4.73067	+
260	-0.470226	6.17977	SV_73	SV_194	0.941124	1.48812	-5.98907	+
261	-0.470226	6.17977	SV_73	SV_185	0.941124	5.16217	4.54031	+
262	5.48755	3.25541	SV_63	SV_134	0.985611	2.63993	-6.65407	+
263	5.38432	-3.90277	SV_168	SV_225	0.985611	4.3566	-5.87274	+
264	5.38432	-3.90277	SV_168	SV_104	0.927634	4.82138	4.27506	+
265	4.43074	-5.79555	SV_105	SV_97	0.942857	NA	NA	+
266	4.43074	-5.79555	SV_105	SV_109	0.927634	-4.28371	5.92817	+
267	4.43074	-5.79555	SV_105	SV_287	0.927634	3.25116	-5.40176	+
268	4.43074	-5.79555	SV_105	SV_156	0.942857	3.27688	-5.18996	+
269	4.43074	-5.79555	SV_105	SV_302	0.942857	3.31483	-5.0899	+
270	0.0105911	-7.31499	SV_220	SV_97	0.942857	NA	NA	+
271	0.0105911	-7.31499	SV_220	SV_137	0.985611	3.29384	-5.61079	+
272	0.0105911	-7.31499	SV_220	SV_43	0.942857	NA	NA	+
273	0.0105911	-7.31499	SV_220	SV_287	0.927634	3.25116	-5.40176	+
274	0.0105911	-7.31499	SV_220	SV_96	1	4.73344	4.07459	+
275	0.0105911	-7.31499	SV_220	SV_104	0.927634	4.82138	4.27506	+
276	0.0105911	-7.31499	SV_220	SV_209	0.942857	3.36834	-4.99722	+
277	0.0105911	-7.31499	SV_220	SV_159	0.985611	-0.654409	-6.64999	+
278	4.55539	5.23323	SV_75	SV_27	0.942857	6.04082	3.85643	+
279	4.55539	5.23323	SV_75	SV_69	0.942857	NA	NA	+
280	4.55539	5.23323	SV_75	SV_281	0.942857	NA	NA	+
281	4.55539	5.23323	SV_75	SV_268	0.942857	-5.96643	3.56169	+
282	4.55539	5.23323	SV_75	SV_76	1	-4.52908	5.64499	+
283	4.55539	5.23323	SV_75	SV_97	0.942857	NA	NA	+
284	4.55539	5.23323	SV_75	SV_369	0.927634	NA	NA	+
285	6.98822	2.05899	SV_37	SV_297	0.942857	3.33972	-5.70748	+
286	6.98822	2.05899	SV_37	SV_276	0.941124	-6.87703	2.4166	+
287	3.91562	-4.70998	SV_38	SV_93	0.942857	4.51642	-5.0899	+
288	3.91562	-4.70998	SV_38	SV_132	0.941124	-6.77072	1.54108	+
289	3.91562	-4.70998	SV_38	SV_271	0.942857	1.48812	-6.65407	+
290	-6.98989	2.119	SV_231	SV_307	0.954864	6.65	0.00529557	+
291	-5.39053	4.55919	SV_34	SV_106	0.942857	-2.04388	-6.99312	+
292	-5.39053	4.55919	SV_34	SV_44	0.942857	5.06159	3.32649	+
293	-3.56465	5.92817	SV_4	SV_6	0.942857	-3.31927	5.64499	+
294	-3.56465	5.92817	SV_4	SV_158	-0.942857	4.53741	-5.61079	-
295	-1.49818	5.98578	SV_71	SV_32	0.942857	-6.48889	1.39316	+
296	-1.49818	5.98578	SV_71	SV_212	0.942857	NA	NA	+
297	-1.49818	5.98578	SV_71	SV_122	0.927634	-6.95153	1.80303	+
298	-1.49818	5.98578	SV_71	SV_156	0.942857	3.27688	-5.18996	+
299	-1.49818	5.98578	SV_71	SV_302	0.942857	3.31483	-5.0899	+
300	-1.49818	5.98578	SV_71	SV_293	1	NA	NA	+
301	-1.49818	5.98578	SV_71	SV_143	0.941124	3.70504	-4.7442	+
302	6.32322	2.72399	SV_17	SV_22	0.942857	NA	NA	+
303	6.32322	2.72399	SV_17	SV_39	0.942857	-5.78246	2.4166	+
304	6.32322	2.72399	SV_17	SV_54	0.942857	3.61853	4.78206	+
305	6.32322	2.72399	SV_17	SV_71	1	-1.49818	5.98578	+
306	6.32322	2.72399	SV_17	SV_32	0.942857	-6.48889	1.39316	+
307	6.32322	2.72399	SV_17	SV_212	0.942857	NA	NA	+
308	6.32322	2.72399	SV_17	SV_122	0.927634	-6.95153	1.80303	+
309	6.32322	2.72399	SV_17	SV_156	0.942857	3.27688	-5.18996	+
310	6.32322	2.72399	SV_17	SV_302	0.942857	3.31483	-5.0899	+
311	6.32322	2.72399	SV_17	SV_293	1	NA	NA	+
312	6.32322	2.72399	SV_17	SV_143	0.941124	3.70504	-4.7442	+
313	4.31512	-4.84335	SV_68	SV_60	0.942857	4.39522	-4.91432	+
314	4.31512	-4.84335	SV_68	SV_106	0.942857	-2.04388	-6.99312	+
315	4.31512	-4.84335	SV_68	SV_70	0.942857	4.55437	-5.18996	+
316	4.31512	-4.84335	SV_68	SV_225	0.927634	4.3566	-5.87274	+
317	4.31512	-4.84335	SV_68	SV_147	0.942857	-6.31993	-1.40406	+
318	4.31512	-4.84335	SV_68	SV_220	0.942857	0.0105911	-7.31499	+
319	4.31512	-4.84335	SV_68	SV_137	0.927634	3.29384	-5.61079	+
320	4.31512	-4.84335	SV_68	SV_43	1	NA	NA	+
321	4.31512	-4.84335	SV_68	SV_96	0.942857	4.73344	4.07459	+
322	4.31512	-4.84335	SV_68	SV_209	1	3.36834	-4.99722	+
323	4.31512	-4.84335	SV_68	SV_159	0.927634	-0.654409	-6.64999	+
324	-2.04388	-5.66312	SV_3	SV_18	0.942857	-1.46797	-5.99562	+
325	-2.04388	-5.66312	SV_3	SV_12	1	NA	NA	+
326	-2.04388	-5.66312	SV_3	SV_19	1	NA	NA	+
327	-2.04388	-5.66312	SV_3	SV_53	0.942857	-4.81462	3.56169	+
328	-2.04388	-5.66312	SV_3	SV_27	0.942857	6.04082	3.85643	+
329	-2.04388	-5.66312	SV_3	SV_69	0.942857	NA	NA	+
330	-2.04388	-5.66312	SV_3	SV_31	0.942857	5.98708	3.64421	+
331	-2.04388	-5.66312	SV_3	SV_97	0.942857	NA	NA	+
332	-2.04388	-5.66312	SV_3	SV_170	1	3.26406	-5.508	+
333	-2.04388	-5.66312	SV_3	SV_287	0.927634	3.25116	-5.40176	+
334	-2.04388	-5.66312	SV_3	SV_420	1	3.51613	-4.84335	+
335	-2.04388	-5.66312	SV_3	SV_207	0.985611	3.60658	-4.78615	+
336	0	7.315	SV_1	SV_75	0.942857	4.55539	5.23323	+
337	0	7.315	SV_1	SV_106	0.942857	-2.04388	-6.99312	+
338	0	7.315	SV_1	SV_70	0.942857	4.55437	-5.18996	+
339	0	7.315	SV_1	SV_268	1	-5.96643	3.56169	+
340	0	7.315	SV_1	SV_220	0.942857	0.0105911	-7.31499	+
341	0	7.315	SV_1	SV_76	0.942857	-4.52908	5.64499	+
342	0	7.315	SV_1	SV_369	0.985611	NA	NA	+
343	0	7.315	SV_1	SV_96	0.942857	4.73344	4.07459	+
344	0.470226	6.17977	SV_64	SV_235	1	-0.665	6.65	+
345	3.90706	6.04621	SV_14	SV_33	0.927634	-3.26595	5.2741	+
346	3.90706	6.04621	SV_14	SV_54	0.942857	3.61853	4.78206	+
347	3.90706	6.04621	SV_14	SV_98	0.941124	-0.470226	7.12023	+
348	3.90706	6.04621	SV_14	SV_32	0.942857	-6.48889	1.39316	+
349	5.86735	3.46095	SV_16	SV_54	0.942857	3.61853	4.78206	+
350	5.86735	3.46095	SV_16	SV_145	0.942857	3.86211	-6.03782	+
351	5.86735	3.46095	SV_16	SV_98	0.941124	-0.470226	7.12023	+
352	5.86735	3.46095	SV_16	SV_144	0.927634	3.65497	-5.98676	+
353	5.86735	3.46095	SV_16	SV_32	0.942857	-6.48889	1.39316	+
354	4.07477	-6.02065	SV_285	SV_401	-0.927634	NA	NA	-
355	3.86211	-6.03782	SV_145	SV_144	0.927634	3.65497	-5.98676	+
356	3.40051	-5.79555	SV_120	SV_123	0.927634	NA	NA	+
357	3.40051	-5.79555	SV_120	SV_128	1	NA	NA	+
358	3.33972	-5.70748	SV_297	SV_276	0.941124	-6.87703	2.4166	+
359	3.33972	-5.70748	SV_297	SV_26	0.942857	NA	NA	+
360	-6.0207	2.62767	SV_58	SV_218	-0.985611	3.43602	-4.91432	-
361	-5.96643	3.56169	SV_268	SV_220	0.942857	0.0105911	-7.31499	+
362	-5.96643	3.56169	SV_268	SV_76	0.942857	-4.52908	5.64499	+
363	-5.96643	3.56169	SV_268	SV_369	0.985611	NA	NA	+
364	-5.96643	3.56169	SV_268	SV_96	0.942857	4.73344	4.07459	+
365	4.57577	-5.29482	SV_20	SV_306	0.942857	NA	NA	+
366	4.57577	-5.29482	SV_20	SV_36	0.942857	2.05396	6.32485	+
367	4.57577	-5.29482	SV_20	SV_120	0.942857	3.40051	-5.79555	+
368	4.57577	-5.29482	SV_20	SV_395	0.927634	3.25547	-5.29482	+
369	4.57577	-5.29482	SV_20	SV_123	0.985611	NA	NA	+
370	4.57577	-5.29482	SV_20	SV_128	0.942857	NA	NA	+
371	2.06403	-5.65657	SV_47	SV_87	-0.927634	-5.66959	2.119	-
372	-6.48889	1.39316	SV_32	SV_149	0.942857	NA	NA	+
373	-6.48889	1.39316	SV_32	SV_293	0.942857	NA	NA	+
374	NA	NA	SV_22	SV_56	0.942857	NA	NA	+
375	NA	NA	SV_22	SV_87	0.942857	-5.66959	2.119	+
376	NA	NA	SV_22	SV_49	0.942857	6.02275	4.07459	+
377	NA	NA	SV_22	SV_138	0.942857	2.63993	-5.98907	+
378	NA	NA	SV_22	SV_112	0.942857	4.56718	-5.508	+
379	NA	NA	SV_22	SV_105	0.942857	4.43074	-5.79555	+
380	NA	NA	SV_22	SV_71	0.942857	-1.49818	5.98578	+
381	NA	NA	SV_22	SV_247	0.942857	-6.31993	-2.73406	+
382	NA	NA	SV_22	SV_113	0.942857	NA	NA	+
383	NA	NA	SV_22	SV_88	0.942857	4.76911	3.64421	+
384	NA	NA	SV_22	SV_122	0.985611	-6.95153	1.80303	+
385	NA	NA	SV_22	SV_156	1	3.27688	-5.18996	+
386	NA	NA	SV_22	SV_293	0.942857	NA	NA	+
387	NA	NA	SV_45	SV_24	0.942857	4.0223	-4.71859	+
388	NA	NA	SV_45	SV_8	0.942857	5.78655	4.43612	+
389	NA	NA	SV_45	SV_41	0.942857	4.22466	-4.78615	+
390	NA	NA	SV_45	SV_68	0.942857	4.31512	-4.84335	+
391	NA	NA	SV_45	SV_53	0.942857	-4.81462	3.56169	+
392	NA	NA	SV_45	SV_31	0.942857	5.98708	3.64421	+
393	NA	NA	SV_45	SV_52	0.942857	4.58008	-5.40176	+
394	NA	NA	SV_45	SV_147	1	-6.31993	-1.40406	+
395	NA	NA	SV_45	SV_297	0.942857	3.33972	-5.70748	+
396	NA	NA	SV_45	SV_43	0.942857	NA	NA	+
397	NA	NA	SV_45	SV_209	0.942857	3.36834	-4.99722	+
398	NA	NA	SV_12	SV_19	1	NA	NA	+
399	NA	NA	SV_12	SV_53	0.942857	-4.81462	3.56169	+
400	NA	NA	SV_12	SV_27	0.942857	6.04082	3.85643	+
401	NA	NA	SV_12	SV_69	0.942857	NA	NA	+
402	NA	NA	SV_12	SV_31	0.942857	5.98708	3.64421	+
403	NA	NA	SV_12	SV_97	0.942857	NA	NA	+
404	NA	NA	SV_12	SV_170	1	3.26406	-5.508	+
405	NA	NA	SV_12	SV_287	0.927634	3.25116	-5.40176	+
406	NA	NA	SV_12	SV_420	1	3.51613	-4.84335	+
407	NA	NA	SV_12	SV_207	0.985611	3.60658	-4.78615	+
408	NA	NA	SV_56	SV_116	0.927634	NA	NA	+
409	NA	NA	SV_56	SV_49	1	6.02275	4.07459	+
410	NA	NA	SV_56	SV_138	1	2.63993	-5.98907	+
411	NA	NA	SV_56	SV_247	1	-6.31993	-2.73406	+
412	NA	NA	SV_56	SV_113	1	NA	NA	+
413	NA	NA	SV_56	SV_88	1	4.76911	3.64421	+
414	NA	NA	SV_56	SV_122	0.927634	-6.95153	1.80303	+
415	NA	NA	SV_56	SV_156	0.942857	3.27688	-5.18996	+
416	NA	NA	SV_15	SV_68	0.942857	4.31512	-4.84335	+
417	NA	NA	SV_15	SV_60	1	4.39522	-4.91432	+
418	NA	NA	SV_15	SV_74	0.942857	NA	NA	+
419	NA	NA	SV_15	SV_168	0.942857	5.38432	-3.90277	+
420	NA	NA	SV_15	SV_225	0.985611	4.3566	-5.87274	+
421	NA	NA	SV_15	SV_67	0.942857	4.17628	-5.98676	+
422	NA	NA	SV_15	SV_43	0.942857	NA	NA	+
423	NA	NA	SV_15	SV_104	0.927634	4.82138	4.27506	+
424	NA	NA	SV_15	SV_209	0.942857	3.36834	-4.99722	+
425	NA	NA	SV_19	SV_53	0.942857	-4.81462	3.56169	+
426	NA	NA	SV_19	SV_27	0.942857	6.04082	3.85643	+
427	NA	NA	SV_19	SV_69	0.942857	NA	NA	+
428	NA	NA	SV_19	SV_31	0.942857	5.98708	3.64421	+
429	NA	NA	SV_19	SV_97	0.942857	NA	NA	+
430	NA	NA	SV_19	SV_170	1	3.26406	-5.508	+
431	NA	NA	SV_19	SV_287	0.927634	3.25116	-5.40176	+
432	NA	NA	SV_19	SV_420	1	3.51613	-4.84335	+
433	NA	NA	SV_19	SV_207	0.985611	3.60658	-4.78615	+
434	NA	NA	SV_74	SV_225	0.927634	4.3566	-5.87274	+
435	NA	NA	SV_74	SV_271	0.942857	1.48812	-6.65407	+
436	NA	NA	SV_74	SV_283	0.941124	NA	NA	+
437	NA	NA	SV_74	SV_26	0.942857	NA	NA	+
438	NA	NA	SV_116	SV_49	0.927634	6.02275	4.07459	+
439	NA	NA	SV_116	SV_138	0.927634	2.63993	-5.98907	+
440	NA	NA	SV_116	SV_11	0.954864	-4.42675	4.93325	+
441	NA	NA	SV_116	SV_247	0.927634	-6.31993	-2.73406	+
442	NA	NA	SV_116	SV_113	0.927634	NA	NA	+
443	NA	NA	SV_116	SV_88	0.927634	4.76911	3.64421	+
444	NA	NA	SV_69	SV_112	0.942857	4.56718	-5.508	+
445	NA	NA	SV_69	SV_105	0.942857	4.43074	-5.79555	+
446	NA	NA	SV_69	SV_220	0.942857	0.0105911	-7.31499	+
447	NA	NA	SV_69	SV_76	0.942857	-4.52908	5.64499	+
448	NA	NA	SV_69	SV_97	1	NA	NA	+
449	NA	NA	SV_69	SV_137	0.927634	3.29384	-5.61079	+
450	NA	NA	SV_69	SV_170	0.942857	3.26406	-5.508	+
451	NA	NA	SV_69	SV_287	0.985611	3.25116	-5.40176	+
452	NA	NA	SV_69	SV_96	0.942857	4.73344	4.07459	+
453	NA	NA	SV_69	SV_420	0.942857	3.51613	-4.84335	+
454	NA	NA	SV_69	SV_207	0.927634	3.60658	-4.78615	+
455	NA	NA	SV_69	SV_159	0.927634	-0.654409	-6.64999	+
456	NA	NA	SV_135	SV_308	0.92	2.06403	-6.98657	+
457	NA	NA	SV_281	SV_76	0.942857	-4.52908	5.64499	+
458	NA	NA	SV_281	SV_369	0.927634	NA	NA	+
459	NA	NA	SV_154	SV_387	1	-2.65	5.98578	+
460	NA	NA	SV_79	SV_198	0.942857	-6.1706	1.39316	+
461	NA	NA	SV_79	SV_283	0.941124	NA	NA	+
462	NA	NA	SV_92	SV_109	0.985611	-4.28371	5.92817	+
463	NA	NA	SV_92	SV_302	0.942857	3.31483	-5.0899	+
464	NA	NA	SV_92	SV_143	0.941124	3.70504	-4.7442	+
465	NA	NA	SV_306	SV_36	1	2.05396	6.32485	+
466	NA	NA	SV_306	SV_120	1	3.40051	-5.79555	+
467	NA	NA	SV_306	SV_123	0.927634	NA	NA	+
468	NA	NA	SV_306	SV_128	1	NA	NA	+
469	NA	NA	SV_113	SV_88	1	4.76911	3.64421	+
470	NA	NA	SV_113	SV_122	0.927634	-6.95153	1.80303	+
471	NA	NA	SV_113	SV_156	0.942857	3.27688	-5.18996	+
472	NA	NA	SV_97	SV_137	0.927634	3.29384	-5.61079	+
473	NA	NA	SV_97	SV_170	0.942857	3.26406	-5.508	+
474	NA	NA	SV_97	SV_287	0.985611	3.25116	-5.40176	+
475	NA	NA	SV_97	SV_96	0.942857	4.73344	4.07459	+
476	NA	NA	SV_97	SV_420	0.942857	3.51613	-4.84335	+
477	NA	NA	SV_97	SV_207	0.927634	3.60658	-4.78615	+
478	NA	NA	SV_97	SV_159	0.927634	-0.654409	-6.64999	+
479	NA	NA	SV_212	SV_149	0.942857	NA	NA	+
480	NA	NA	SV_212	SV_293	0.942857	NA	NA	+
481	NA	NA	SV_43	SV_96	0.942857	4.73344	4.07459	+
482	NA	NA	SV_43	SV_209	1	3.36834	-4.99722	+
483	NA	NA	SV_43	SV_159	0.927634	-0.654409	-6.64999	+
484	NA	NA	SV_123	SV_128	0.927634	NA	NA	+
485	NA	NA	SV_293	SV_143	0.941124	3.70504	-4.7442	+

## Sheet: edge_data_18S_net_Jun
	X2	Y2	OTU_2	OTU_1	weight	X1	Y1	cor
1	0	7.26471	SV_1	SV_367	-0.924062	NA	NA	-
2	5.81693	3.66528	SV_54	SV_55	0.927634	6.56766	-0.154081	+
3	5.81693	3.66528	SV_54	SV_43	0.942857	5.77989	0.278999	+
4	6.9213	-0.014065	SV_88	SV_47	-0.941124	3.42905	-4.75721	-
5	6.9213	-0.014065	SV_88	SV_260	0.985611	5.8826	0.117153	+
6	6.9213	-0.014065	SV_88	SV_96	0.942857	5.70862	0.652611	+
7	6.84022	1.27471	SV_8	SV_38	0.942857	5.50255	-3.2127	+
8	6.84022	1.27471	SV_8	SV_117	0.927634	-5.17903	-4.69251	+
9	6.84022	1.27471	SV_8	SV_303	0.942857	NA	NA	+
10	6.84022	1.27471	SV_8	SV_144	0.942857	4.62323	-3.3996	+
11	5.70862	0.652611	SV_96	SV_188	0.941124	-2.90696	6.59473	+
12	5.641	-3.29263	SV_68	SV_112	0.927634	5.85377	-4.29364	+
13	5.641	-3.29263	SV_68	SV_75	0.954864	5.43458	2.23831	+
14	5.641	-3.29263	SV_68	SV_192	0.985611	5.50255	-4.60988	+
15	5.641	-3.29263	SV_68	SV_52	0.985611	5.3505	-4.65929	+
16	5.641	-3.29263	SV_68	SV_195	0.927634	5.19151	-4.676	+
17	5.641	-3.29263	SV_68	SV_287	0.941176	NA	NA	+
18	5.641	-3.29263	SV_68	SV_127	0.941176	6.10342	1.27471	+
19	5.95203	-3.99122	SV_216	SV_88	0.941124	6.9213	-0.014065	+
20	5.95203	-3.99122	SV_216	SV_260	0.954864	5.8826	0.117153	+
21	5.95203	-3.99122	SV_216	SV_98	0.935484	-0.764706	6.5	+
22	5.95203	-3.99122	SV_216	SV_188	0.935484	-2.90696	6.59473	+
23	-1.8255	5.51327	SV_130	SV_242	1	6.58164	2.90057	+
24	-2.36623	5.2893	SV_71	SV_59	0.942857	-5.52057	-1.55655	+
25	-2.36623	5.2893	SV_71	SV_134	1	4.15633	-5.28561	+
26	-2.36623	5.2893	SV_71	SV_23	0.942857	-7.13597	0.201624	+
27	-2.36623	5.2893	SV_71	SV_248	0.942857	NA	NA	+
28	7.11748	1.01434	SV_21	SV_152	0.92582	5.03252	-3.1633	+
29	7.1991	0.840902	SV_27	SV_39	0.942857	-6.47371	1.34868	+
30	5.91879	-3.67498	SV_93	SV_124	1	-5.79837	-2.41152	+
31	5.19151	-4.676	SV_195	SV_77	0.942857	4.88048	-3.2127	+
32	4.88048	-4.60988	SV_105	SV_162	0.942857	5.72066	0.461303	+
33	4.15633	-5.28561	SV_134	SV_23	0.942857	-7.13597	0.201624	+
34	4.15633	-5.28561	SV_134	SV_248	0.942857	NA	NA	+
35	-5.17903	-4.69251	SV_117	SV_243	0.927634	4.52926	-4.29364	+
36	-5.17903	-4.69251	SV_117	SV_303	0.985611	NA	NA	+
37	-5.17903	-4.69251	SV_117	SV_144	0.985611	4.62323	-3.3996	+
38	-5.82614	3.64673	SV_34	SV_261	0.942857	4.74203	-4.52995	+
39	-5.82614	3.64673	SV_34	SV_212	0.942857	NA	NA	+
40	-5.82614	3.64673	SV_34	SV_145	0.942857	4.431	-3.83136	+
41	-5.82614	3.64673	SV_34	SV_111	0.942857	0.458415	-6.55769	+
42	-3.94302	5.40989	SV_4	SV_251	0.941124	NA	NA	+
43	-3.94302	5.40989	SV_4	SV_178	0.942857	6.37598	-0.154081	+
44	-3.94302	5.40989	SV_4	SV_74	0.942857	NA	NA	+
45	-3.66523	5.02754	SV_11	SV_55	0.927634	6.56766	-0.154081	+
46	5.43458	2.23831	SV_75	SV_192	0.941124	5.50255	-4.60988	+
47	5.43458	2.23831	SV_75	SV_52	0.941124	5.3505	-4.65929	+
48	5.85377	-4.29364	SV_112	SV_192	0.942857	5.50255	-4.60988	+
49	5.85377	-4.29364	SV_112	SV_52	0.942857	5.3505	-4.65929	+
50	5.85377	-4.29364	SV_112	SV_70	0.942857	4.46423	-3.67498	+
51	5.85377	-4.29364	SV_112	SV_287	0.985611	NA	NA	+
52	5.85377	-4.29364	SV_112	SV_220	0.942857	0.872154	-7.0765	+
53	5.85377	-4.29364	SV_112	SV_127	0.985611	6.10342	1.27471	+
54	5.3505	-4.65929	SV_52	SV_195	0.942857	5.19151	-4.676	+
55	5.3505	-4.65929	SV_52	SV_287	0.927634	NA	NA	+
56	5.3505	-4.65929	SV_52	SV_127	0.927634	6.10342	1.27471	+
57	5.15468	2.51822	SV_14	SV_264	-0.927634	NA	NA	-
58	6.47182	1.3693	SV_12	SV_113	0.942857	NA	NA	+
59	6.25353	-1.00825	SV_17	SV_19	0.942857	NA	NA	+
60	6.25353	-1.00825	SV_17	SV_41	0.942857	5.3505	-3.1633	+
61	5.50255	-3.2127	SV_38	SV_40	0.942857	-6.47371	-0.180729	+
62	5.50255	-3.2127	SV_38	SV_80	0.927634	5.94834	1.16204	+
63	5.7598	-3.3996	SV_20	SV_252	0.941124	NA	NA	+
64	5.03252	-4.65929	SV_314	SV_162	0.942857	5.72066	0.461303	+
65	5.03252	-3.1633	SV_152	SV_269	0.92582	0.606077	-5.91074	+
66	-1.1836	-5.62662	SV_3	SV_27	0.942857	7.1991	0.840902	+
67	-1.1836	-5.62662	SV_3	SV_39	1	-6.47371	1.34868	+
68	-1.1836	-5.62662	SV_3	SV_60	0.942857	5.641	-4.52995	+
69	-1.1836	-5.62662	SV_3	SV_117	0.985611	-5.17903	-4.69251	+
70	-1.1836	-5.62662	SV_3	SV_243	0.942857	4.52926	-4.29364	+
71	-1.1836	-5.62662	SV_3	SV_303	0.942857	NA	NA	+
72	-1.1836	-5.62662	SV_3	SV_144	0.942857	4.62323	-3.3996	+
73	-0.521341	-6.00898	SV_18	SV_12	1	6.47182	1.3693	+
74	-0.521341	-6.00898	SV_18	SV_113	0.942857	NA	NA	+
75	-0.521341	-6.77368	SV_30	SV_286	0.942857	NA	NA	+
76	-0.521341	-6.77368	SV_30	SV_194	0.927634	2.70178	-5.28561	+
77	-5.17903	-3.1631	SV_97	SV_14	0.927634	5.15468	2.51822	+
78	-6.24785	-1.02816	SV_9	SV_34	0.942857	-5.82614	3.64673	+
79	-6.24785	-1.02816	SV_9	SV_261	1	4.74203	-4.52995	+
80	-6.24785	-1.02816	SV_9	SV_145	1	4.431	-3.83136	+
81	-6.24785	-1.02816	SV_9	SV_111	1	0.458415	-6.55769	+
82	-5.52057	-1.55655	SV_59	SV_134	0.942857	4.15633	-5.28561	+
83	-5.52057	-1.55655	SV_59	SV_248	1	NA	NA	+
84	-6.47371	-0.180729	SV_40	SV_80	0.927634	5.94834	1.16204	+
85	-4.39251	4.02653	SV_72	SV_270	-0.927634	NA	NA	-
86	-4.39251	4.02653	SV_72	SV_314	-0.927634	5.03252	-4.65929	-
87	-2.36623	6.81871	SV_101	SV_107	1	-1.8255	6.59473	+
88	-2.36623	6.81871	SV_101	SV_130	1	-1.8255	5.51327	+
89	-2.36623	6.81871	SV_101	SV_242	1	6.58164	2.90057	+
90	-1.8255	6.59473	SV_107	SV_130	1	-1.8255	5.51327	+
91	-1.8255	6.59473	SV_107	SV_242	1	6.58164	2.90057	+
92	-1.60153	6.054	SV_108	SV_315	0.92	NA	NA	+
93	4.74203	-4.52995	SV_261	SV_145	1	4.431	-3.83136	+
94	4.74203	-4.52995	SV_261	SV_111	1	0.458415	-6.55769	+
95	4.46423	-3.67498	SV_70	SV_220	1	0.872154	-7.0765	+
96	6.70301	-2.39161	SV_37	SV_178	-0.971008	6.37598	-0.154081	-
97	5.19151	-3.14659	SV_24	SV_19	0.942857	NA	NA	+
98	5.19151	-3.14659	SV_24	SV_41	0.942857	5.3505	-3.1633	+
99	5.19151	-3.14659	SV_24	SV_106	0.927634	NA	NA	+
100	5.19151	-3.14659	SV_24	SV_159	0.985611	1.20395	-5.62282	+
101	5.19151	-3.14659	SV_24	SV_71	1	-2.36623	5.2893	+
102	5.19151	-3.14659	SV_24	SV_59	0.942857	-5.52057	-1.55655	+
103	5.19151	-3.14659	SV_24	SV_134	1	4.15633	-5.28561	+
104	5.19151	-3.14659	SV_24	SV_23	0.942857	-7.13597	0.201624	+
105	5.19151	-3.14659	SV_24	SV_248	0.942857	NA	NA	+
106	-3.94302	4.17257	SV_109	SV_32	1	NA	NA	+
107	-3.94302	4.17257	SV_109	SV_195	0.942857	5.19151	-4.676	+
108	-3.94302	4.17257	SV_109	SV_197	0.927634	5.82616	1.01434	+
109	-3.94302	4.17257	SV_109	SV_77	1	4.88048	-3.2127	+
110	6.47919	3.28292	SV_191	SV_495	1	5.80405	-2.39161	+
111	5.82616	1.01434	SV_197	SV_77	0.927634	4.88048	-3.2127	+
112	5.82616	1.01434	SV_197	SV_152	0.939336	5.03252	-3.1633	+
113	5.82616	1.01434	SV_197	SV_269	0.927634	0.606077	-5.91074	+
114	6.98081	-1.53664	SV_149	SV_260	0.927634	5.8826	0.117153	+
115	6.98081	-1.53664	SV_149	SV_98	0.941124	-0.764706	6.5	+
116	1.80182	-5.91074	SV_116	SV_89	0.971008	NA	NA	+
117	1.80182	-5.91074	SV_116	SV_72	-0.985184	-4.39251	4.02653	-
118	1.80182	-5.91074	SV_116	SV_270	0.971008	NA	NA	+
119	1.80182	-5.91074	SV_116	SV_314	0.971008	5.03252	-4.65929	+
120	-1.1836	-7.15604	SV_103	SV_106	0.985611	NA	NA	+
121	-1.1836	-7.15604	SV_103	SV_159	0.927634	1.20395	-5.62282	+
122	-1.1836	-7.15604	SV_103	SV_59	0.942857	-5.52057	-1.55655	+
123	-1.1836	-7.15604	SV_103	SV_112	0.942857	5.85377	-4.29364	+
124	-1.1836	-7.15604	SV_103	SV_248	0.942857	NA	NA	+
125	-1.1836	-7.15604	SV_103	SV_287	0.927634	NA	NA	+
126	-1.1836	-7.15604	SV_103	SV_127	0.927634	6.10342	1.27471	+
127	-1.1836	-7.15604	SV_103	SV_252	0.941124	NA	NA	+
128	4.37722	4.8052	SV_36	SV_70	0.942857	4.46423	-3.67498	+
129	4.37722	4.8052	SV_36	SV_220	0.942857	0.872154	-7.0765	+
130	5.50255	-4.60988	SV_192	SV_52	1	5.3505	-4.65929	+
131	5.50255	-4.60988	SV_192	SV_195	0.942857	5.19151	-4.676	+
132	5.50255	-4.60988	SV_192	SV_287	0.927634	NA	NA	+
133	5.50255	-4.60988	SV_192	SV_127	0.927634	6.10342	1.27471	+
134	5.85377	-3.52894	SV_66	SV_26	0.942857	-5.81146	0.96633	+
135	5.85377	-3.52894	SV_66	SV_60	0.942857	5.641	-4.52995	+
136	5.85377	-3.52894	SV_66	SV_75	0.941124	5.43458	2.23831	+
137	5.85377	-3.52894	SV_66	SV_117	0.927634	-5.17903	-4.69251	+
138	5.85377	-3.52894	SV_66	SV_243	0.942857	4.52926	-4.29364	+
139	5.85377	-3.52894	SV_66	SV_303	0.942857	NA	NA	+
140	5.85377	-3.52894	SV_66	SV_144	0.942857	4.62323	-3.3996	+
141	1.20395	-5.62282	SV_159	SV_71	0.985611	-2.36623	5.2893	+
142	1.20395	-5.62282	SV_159	SV_59	0.985611	-5.52057	-1.55655	+
143	1.20395	-5.62282	SV_159	SV_134	0.985611	4.15633	-5.28561	+
144	1.20395	-5.62282	SV_159	SV_248	0.985611	NA	NA	+
145	-6.47371	1.34868	SV_39	SV_60	0.942857	5.641	-4.52995	+
146	-6.47371	1.34868	SV_39	SV_117	0.985611	-5.17903	-4.69251	+
147	-6.47371	1.34868	SV_39	SV_243	0.942857	4.52926	-4.29364	+
148	-6.47371	1.34868	SV_39	SV_303	0.942857	NA	NA	+
149	-6.47371	1.34868	SV_39	SV_144	0.942857	4.62323	-3.3996	+
150	-5.81146	0.96633	SV_26	SV_74	0.942857	NA	NA	+
151	5.8826	0.117153	SV_260	SV_96	0.927634	5.70862	0.652611	+
152	3.42905	-4.75721	SV_47	SV_260	-0.924062	5.8826	0.117153	-
153	3.42905	-4.75721	SV_47	SV_96	-0.941124	5.70862	0.652611	-
154	0.764706	6.5	SV_5	SV_191	1	6.47919	3.28292	+
155	0.764706	6.5	SV_5	SV_495	1	5.80405	-2.39161	+
156	5.3505	-3.1633	SV_41	SV_159	0.927634	1.20395	-5.62282	+
157	5.3505	-3.1633	SV_41	SV_71	0.942857	-2.36623	5.2893	+
158	5.3505	-3.1633	SV_41	SV_134	0.942857	4.15633	-5.28561	+
159	5.7598	-4.42298	SV_154	SV_162	-0.941124	5.72066	0.461303	-
160	5.7598	-4.42298	SV_154	SV_403	0.941124	NA	NA	+
161	4.431	-3.99122	SV_156	SV_227	-0.941124	-4.84199	5.40989	-
162	4.431	-3.83136	SV_145	SV_111	1	0.458415	-6.55769	+
163	6.662	1.34528	SV_31	SV_109	0.927634	-3.94302	4.17257	+
164	6.662	1.34528	SV_31	SV_32	0.927634	NA	NA	+
165	6.662	1.34528	SV_31	SV_197	0.955882	5.82616	1.01434	+
166	6.662	1.34528	SV_31	SV_77	0.927634	4.88048	-3.2127	+
167	6.662	1.34528	SV_31	SV_152	0.939336	5.03252	-3.1633	+
168	6.662	1.34528	SV_31	SV_269	0.927634	0.606077	-5.91074	+
169	6.9953	1.16204	SV_63	SV_88	0.942857	6.9213	-0.014065	+
170	6.9953	1.16204	SV_63	SV_47	-0.941124	3.42905	-4.75721	-
171	6.9953	1.16204	SV_63	SV_260	0.927634	5.8826	0.117153	+
172	6.9953	1.16204	SV_63	SV_96	1	5.70862	0.652611	+
173	6.9953	1.16204	SV_63	SV_188	0.941124	-2.90696	6.59473	+
174	7.23502	0.652611	SV_48	SV_216	0.941124	5.95203	-3.99122	+
175	7.16375	0.278999	SV_49	SV_90	0.985611	-6.97513	-1.55655	+
176	5.641	-4.52995	SV_60	SV_117	0.927634	-5.17903	-4.69251	+
177	5.641	-4.52995	SV_60	SV_243	1	4.52926	-4.29364	+
178	NA	NA	SV_7	SV_15	0.927634	NA	NA	+
179	NA	NA	SV_7	SV_68	0.927634	5.641	-3.29263	+
180	NA	NA	SV_7	SV_109	0.942857	-3.94302	4.17257	+
181	NA	NA	SV_7	SV_32	0.942857	NA	NA	+
182	NA	NA	SV_7	SV_192	0.942857	5.50255	-4.60988	+
183	NA	NA	SV_7	SV_52	0.942857	5.3505	-4.65929	+
184	NA	NA	SV_7	SV_195	1	5.19151	-4.676	+
185	NA	NA	SV_7	SV_77	0.942857	4.88048	-3.2127	+
186	NA	NA	SV_22	SV_53	1	NA	NA	+
187	NA	NA	SV_22	SV_16	0.927634	NA	NA	+
188	NA	NA	SV_22	SV_50	1	NA	NA	+
189	NA	NA	SV_15	SV_17	0.927634	6.25353	-1.00825	+
190	NA	NA	SV_15	SV_24	0.927634	5.19151	-3.14659	+
191	NA	NA	SV_15	SV_19	0.985611	NA	NA	+
192	NA	NA	SV_15	SV_41	0.985611	5.3505	-3.1633	+
193	NA	NA	SV_15	SV_159	0.941176	1.20395	-5.62282	+
194	NA	NA	SV_15	SV_71	0.927634	-2.36623	5.2893	+
195	NA	NA	SV_15	SV_59	0.927634	-5.52057	-1.55655	+
196	NA	NA	SV_15	SV_134	0.927634	4.15633	-5.28561	+
197	NA	NA	SV_15	SV_195	0.927634	5.19151	-4.676	+
198	NA	NA	SV_15	SV_248	0.927634	NA	NA	+
199	NA	NA	SV_91	SV_45	0.942857	NA	NA	+
200	NA	NA	SV_91	SV_76	1	NA	NA	+
201	NA	NA	SV_91	SV_112	0.942857	5.85377	-4.29364	+
202	NA	NA	SV_91	SV_287	0.927634	NA	NA	+
203	NA	NA	SV_91	SV_127	0.927634	6.10342	1.27471	+
204	NA	NA	SV_19	SV_41	1	5.3505	-3.1633	+
205	NA	NA	SV_19	SV_159	0.927634	1.20395	-5.62282	+
206	NA	NA	SV_19	SV_71	0.942857	-2.36623	5.2893	+
207	NA	NA	SV_19	SV_134	0.942857	4.15633	-5.28561	+
208	NA	NA	SV_56	SV_48	1	7.23502	0.652611	+
209	NA	NA	SV_56	SV_216	0.941124	5.95203	-3.99122	+
210	NA	NA	SV_45	SV_103	0.942857	-1.1836	-7.15604	+
211	NA	NA	SV_45	SV_106	0.927634	NA	NA	+
212	NA	NA	SV_45	SV_76	0.942857	NA	NA	+
213	NA	NA	SV_45	SV_177	0.942857	NA	NA	+
214	NA	NA	SV_45	SV_154	0.941124	5.7598	-4.42298	+
215	NA	NA	SV_45	SV_403	0.942857	NA	NA	+
216	NA	NA	SV_113	SV_16	0.927634	NA	NA	+
217	NA	NA	SV_106	SV_159	0.941176	1.20395	-5.62282	+
218	NA	NA	SV_106	SV_71	0.927634	-2.36623	5.2893	+
219	NA	NA	SV_106	SV_59	0.927634	-5.52057	-1.55655	+
220	NA	NA	SV_106	SV_134	0.927634	4.15633	-5.28561	+
221	NA	NA	SV_106	SV_177	0.927634	NA	NA	+
222	NA	NA	SV_106	SV_112	0.927634	5.85377	-4.29364	+
223	NA	NA	SV_106	SV_248	0.927634	NA	NA	+
224	NA	NA	SV_106	SV_287	0.941176	NA	NA	+
225	NA	NA	SV_106	SV_127	0.941176	6.10342	1.27471	+
226	NA	NA	SV_106	SV_403	0.927634	NA	NA	+
227	NA	NA	SV_106	SV_252	0.954864	NA	NA	+
228	NA	NA	SV_51	SV_116	-0.937958	1.80182	-5.91074	-
229	NA	NA	SV_51	SV_67	0.941124	5.95203	-3.83136	+
230	NA	NA	SV_51	SV_89	-0.941124	NA	NA	-
231	NA	NA	SV_51	SV_270	-0.941124	NA	NA	-
232	NA	NA	SV_51	SV_314	-0.941124	5.03252	-4.65929	-
233	NA	NA	SV_251	SV_149	-0.941124	6.98081	-1.53664	-
234	NA	NA	SV_251	SV_47	0.935484	3.42905	-4.75721	+
235	NA	NA	SV_251	SV_260	-0.924062	5.8826	0.117153	-
236	NA	NA	SV_251	SV_74	0.941124	NA	NA	+
237	NA	NA	SV_28	SV_286	0.942857	NA	NA	+
238	NA	NA	SV_28	SV_411	0.941124	2.97957	-6.14058	+
239	NA	NA	SV_28	SV_194	0.927634	2.70178	-5.28561	+
240	NA	NA	SV_86	SV_59	0.942857	-5.52057	-1.55655	+
241	NA	NA	SV_86	SV_65	0.942857	3.87854	-6.14058	+
242	NA	NA	SV_86	SV_202	0.942857	5.74454	0.840902	+
243	NA	NA	SV_86	SV_248	0.942857	NA	NA	+
244	NA	NA	SV_89	SV_72	-0.927634	-4.39251	4.02653	-
245	NA	NA	SV_89	SV_270	0.942857	NA	NA	+
246	NA	NA	SV_89	SV_314	1	5.03252	-4.65929	+
247	NA	NA	SV_89	SV_162	0.942857	5.72066	0.461303	+
248	NA	NA	SV_76	SV_112	0.942857	5.85377	-4.29364	+
249	NA	NA	SV_76	SV_287	0.927634	NA	NA	+
250	NA	NA	SV_76	SV_127	0.927634	6.10342	1.27471	+
251	NA	NA	SV_177	SV_154	0.941124	5.7598	-4.42298	+
252	NA	NA	SV_177	SV_264	0.942857	NA	NA	+
253	NA	NA	SV_177	SV_403	1	NA	NA	+
254	NA	NA	SV_53	SV_16	0.927634	NA	NA	+
255	NA	NA	SV_53	SV_50	1	NA	NA	+
256	NA	NA	SV_16	SV_50	0.927634	NA	NA	+
257	NA	NA	SV_32	SV_195	0.942857	5.19151	-4.676	+
258	NA	NA	SV_32	SV_197	0.927634	5.82616	1.01434	+
259	NA	NA	SV_32	SV_77	1	4.88048	-3.2127	+
260	NA	NA	SV_270	SV_314	0.942857	5.03252	-4.65929	+
261	NA	NA	SV_264	SV_403	0.942857	NA	NA	+
262	NA	NA	SV_212	SV_122	-0.971008	NA	NA	-
263	NA	NA	SV_212	SV_90	0.927634	-6.97513	-1.55655	+
264	NA	NA	SV_303	SV_144	1	4.62323	-3.3996	+
265	NA	NA	SV_286	SV_194	0.985611	2.70178	-5.28561	+
266	NA	NA	SV_287	SV_127	1	6.10342	1.27471	+

## Sheet: edge_data_18S_net_Aug
	X2	Y2	OTU_2	OTU_1	weight	X1	Y1	cor
1	-0.5539	6.4961	SV_64	SV_151	0.941124	-5.28482	-5.23512	+
2	7.52029	-0.687539	SV_143	SV_54	0.927634	4.52974	4.61888	+
3	7.52029	-0.687539	SV_143	SV_444	1	6.36766	-0.687539	+
4	6.28819	-1.64652	SV_181	SV_398	0.927634	6.18461	-1.41037	+
5	6.28819	-1.64652	SV_181	SV_424	0.927634	NA	NA	+
6	6.28819	-1.64652	SV_181	SV_332	-0.970588	-6.84297	-3.29589	-
7	6.28819	-1.64652	SV_181	SV_311	0.927634	6.18461	-1.02578	+
8	6.28819	-1.64652	SV_181	SV_509	0.941176	-4.86101	-4.70367	+
9	-0.783333	7.05	SV_171	SV_324	0.941124	NA	NA	+
10	-0.783333	7.05	SV_171	SV_269	-0.941124	5.21673	-5.78666	-
11	-5.28482	-5.58373	SV_338	SV_186	-0.942857	5.80384	4.25195	-
12	6.10361	2.74491	SV_88	SV_355	0.927634	7.19832	-1.95897	+
13	6.10361	2.74491	SV_88	SV_398	0.927634	6.18461	-1.41037	+
14	6.10361	2.74491	SV_88	SV_214	0.927634	5.43083	-3.91018	+
15	7.19832	-0.477186	SV_41	SV_54	0.927634	4.52974	4.61888	+
16	6.16332	-1.15339	SV_93	SV_300	0.954864	-4.54693	5.38776	+
17	6.16332	-1.15339	SV_93	SV_156	0.941176	6.81504	-0.445426	+
18	6.18461	-1.02578	SV_311	SV_509	0.985611	-4.86101	-4.70367	+
19	4.53834	-4.61166	SV_111	SV_357	0.942857	7.07291	-1.99073	+
20	4.53834	-4.61166	SV_111	SV_266	-1	-4.52113	-6.19276	-
21	4.53834	-4.61166	SV_111	SV_86	0.942857	NA	NA	+
22	0.756222	-6.80793	SV_179	SV_333	0.941124	7.42511	-1.83624	+
23	0.756222	-6.80793	SV_179	SV_379	1	-0.449204	-7.68372	+
24	0.756222	-6.80793	SV_179	SV_391	1	NA	NA	+
25	0.756222	-6.80793	SV_179	SV_163	0.941124	6.36766	-1.74861	+
26	0.756222	-6.80793	SV_179	SV_377	0.941124	6.22662	-0.903415	+
27	0.756222	-6.80793	SV_179	SV_157	0.954864	-7.72339	-1.24019	+
28	0.756222	-6.80793	SV_179	SV_509	-0.924062	-4.86101	-4.70367	-
29	-2.39951	-5.84576	SV_117	SV_300	0.941124	-4.54693	5.38776	+
30	-5.35299	-3.29589	SV_175	SV_273	-0.942857	-3.9087	-4.92102	-
31	-5.35299	-3.29589	SV_175	SV_357	-0.942857	7.07291	-1.99073	-
32	-5.35299	-3.29589	SV_175	SV_86	-0.942857	NA	NA	-
33	-5.35299	-3.29589	SV_175	SV_294	-0.942857	6.16332	-1.28276	-
34	-6.55841	-4.17169	SV_237	SV_89	0.942857	7.3168	-1.907	+
35	-7.49981	1.76092	SV_109	SV_68	0.927634	7.70334	-1.41037	+
36	-7.49981	1.76092	SV_109	SV_333	0.927634	7.42511	-1.83624	+
37	-7.49981	1.76092	SV_109	SV_163	0.927634	6.36766	-1.74861	+
38	-7.49981	1.76092	SV_109	SV_377	0.927634	6.22662	-0.903415	+
39	-7.49981	1.76092	SV_109	SV_157	0.941176	-7.72339	-1.24019	+
40	-7.49981	1.76092	SV_109	SV_66	1	6.57115	-0.529155	+
41	7.07291	-0.445426	SV_24	SV_26	0.942857	-6.09798	-4.32129	+
42	7.07291	-0.445426	SV_24	SV_231	0.941124	-6.88131	-3.53796	+
43	5.80384	2.80454	SV_79	SV_14	-0.927634	NA	NA	-
44	5.80384	2.80454	SV_79	SV_97	0.942857	-2.39951	-7.41242	+
45	5.80384	2.80454	SV_79	SV_305	0.927634	NA	NA	+
46	6.94203	2.01247	SV_165	SV_215	1	6.7876	-3.91018	+
47	6.94203	2.01247	SV_165	SV_311	0.942857	6.18461	-1.02578	+
48	6.94203	2.01247	SV_165	SV_509	0.927634	-4.86101	-4.70367	+
49	6.94398	-0.434743	SV_20	SV_83	0.985611	NA	NA	+
50	7.3168	-0.529155	SV_52	SV_179	-0.941124	0.756222	-6.80793	-
51	7.3168	-0.529155	SV_52	SV_4	0.941124	-7.49981	0.653115	+
52	7.3168	-0.529155	SV_52	SV_18	-0.942857	3.099	-7.01308	-
53	7.3168	-0.529155	SV_52	SV_109	-0.927634	-7.49981	1.76092	-
54	7.3168	-0.529155	SV_52	SV_148	-0.942857	7.72463	-1.28276	-
55	7.3168	-0.529155	SV_52	SV_49	-0.927634	6.40338	2.80454	-
56	7.3168	-0.529155	SV_52	SV_188	-0.927634	-6.7932	3.11711	-
57	7.3168	-0.529155	SV_52	SV_30	-0.927634	1.74223	-7.01308	-
58	7.3168	-0.529155	SV_52	SV_333	-0.942857	7.42511	-1.83624	-
59	7.3168	-0.529155	SV_52	SV_379	-0.941124	-0.449204	-7.68372	-
60	7.3168	-0.529155	SV_52	SV_391	-0.941124	NA	NA	-
61	7.3168	-0.529155	SV_52	SV_182	-0.927634	6.57115	-1.907	-
62	7.3168	-0.529155	SV_52	SV_163	-0.942857	6.36766	-1.74861	-
63	7.3168	-0.529155	SV_52	SV_377	-1	6.22662	-0.903415	-
64	7.3168	-0.529155	SV_52	SV_157	-0.985611	-7.72339	-1.24019	-
65	7.3168	-0.529155	SV_52	SV_66	-0.927634	6.57115	-0.529155	-
66	7.42511	-1.83624	SV_333	SV_379	0.941124	-0.449204	-7.68372	+
67	7.42511	-1.83624	SV_333	SV_391	0.941124	NA	NA	+
68	7.42511	-1.83624	SV_333	SV_182	0.927634	6.57115	-1.907	+
69	7.42511	-1.83624	SV_333	SV_163	1	6.36766	-1.74861	+
70	7.42511	-1.83624	SV_333	SV_377	0.942857	6.22662	-0.903415	+
71	7.42511	-1.83624	SV_333	SV_157	0.985611	-7.72339	-1.24019	+
72	7.42511	-1.83624	SV_333	SV_66	0.927634	6.57115	-0.529155	+
73	7.19832	-1.95897	SV_355	SV_181	0.927634	6.28819	-1.64652	+
74	7.19832	-1.95897	SV_355	SV_398	1	6.18461	-1.41037	+
75	6.94398	-2.00141	SV_137	SV_300	0.941124	-4.54693	5.38776	+
76	6.94398	-2.00141	SV_137	SV_84	0.942857	-6.34004	-2.79296	+
77	6.57115	-1.907	SV_182	SV_163	0.927634	6.36766	-1.74861	+
78	6.57115	-1.907	SV_182	SV_377	0.927634	6.22662	-0.903415	+
79	6.57115	-1.907	SV_182	SV_157	0.941176	-7.72339	-1.24019	+
80	6.57115	-1.907	SV_182	SV_428	0.941176	6.46284	-0.599916	+
81	6.68963	-0.477186	SV_404	SV_83	-0.927634	NA	NA	-
82	6.10922	-2.73518	SV_150	SV_299	0.941124	0.47166	-7.68372	+
83	6.10922	-2.73518	SV_150	SV_188	0.927634	-6.7932	3.11711	+
84	6.10922	-2.73518	SV_150	SV_30	0.927634	1.74223	-7.01308	+
85	6.10922	-2.73518	SV_150	SV_378	0.941124	-0.733766	-6.80793	+
86	1.74223	-7.01308	SV_30	SV_333	0.927634	7.42511	-1.83624	+
87	1.74223	-7.01308	SV_30	SV_163	0.927634	6.36766	-1.74861	+
88	1.74223	-7.01308	SV_30	SV_377	0.927634	6.22662	-0.903415	+
89	1.74223	-7.01308	SV_30	SV_157	0.941176	-7.72339	-1.24019	+
90	-0.449204	-7.68372	SV_379	SV_391	1	NA	NA	+
91	-0.449204	-7.68372	SV_379	SV_163	0.941124	6.36766	-1.74861	+
92	-0.449204	-7.68372	SV_379	SV_377	0.941124	6.22662	-0.903415	+
93	-0.449204	-7.68372	SV_379	SV_157	0.954864	-7.72339	-1.24019	+
94	-0.449204	-7.68372	SV_379	SV_509	-0.924062	-4.86101	-4.70367	-
95	-4.18126	-4.70367	SV_9	SV_71	0.942857	-5.43643	3.90045	+
96	-4.18126	-4.70367	SV_9	SV_117	0.942857	-2.39951	-5.84576	+
97	-3.9087	-4.92102	SV_273	SV_294	1	6.16332	-1.28276	+
98	-3.9087	-4.92102	SV_273	SV_412	-0.942857	6.15869	1.22913	-
99	-3.75744	-5.23512	SV_59	SV_95	0.942857	5.54971	2.97434	+
100	-3.75744	-5.23512	SV_59	SV_80	0.942857	5.3799	3.82801	+
101	-4.86101	-6.11518	SV_390	SV_63	0.941124	5.32027	3.52824	+
102	-5.46425	-3.07753	SV_58	SV_301	0.927634	7.52029	-1.74861	+
103	-5.46425	-3.07753	SV_58	SV_357	0.942857	7.07291	-1.99073	+
104	-5.46425	-3.07753	SV_58	SV_86	0.942857	NA	NA	+
105	-5.31465	-3.53796	SV_132	SV_234	-0.942857	-5.46425	-3.99839	-
106	-5.35299	-3.78002	SV_205	SV_407	0.942857	-2.43116	6.61755	+
107	-5.46425	-3.99839	SV_234	SV_419	0.942857	-6.73171	-3.07753	+
108	-5.63755	-4.17169	SV_122	SV_14	-0.927634	NA	NA	-
109	-6.09798	-4.32129	SV_26	SV_252	0.942857	5.3799	3.22847	+
110	-6.09798	-4.32129	SV_26	SV_231	0.941124	-6.88131	-3.53796	+
111	-6.34004	-4.28295	SV_87	SV_241	-0.942857	-4.18126	-6.11518	-
112	-7.72339	-1.24019	SV_157	SV_66	0.941176	6.57115	-0.529155	+
113	-6.94591	1.99035	SV_2	SV_28	-0.942857	4.52974	6.18555	-
114	-6.16257	1.20702	SV_81	SV_52	0.927634	7.3168	-0.529155	+
115	-6.16257	1.20702	SV_81	SV_10	-0.924062	9.59306659332093e-17	6.26667	-
116	-6.16257	1.20702	SV_81	SV_18	-0.927634	3.099	-7.01308	-
117	-6.16257	1.20702	SV_81	SV_68	-0.927634	7.70334	-1.41037	-
118	-6.16257	1.20702	SV_81	SV_188	-0.970588	-6.7932	3.11711	-
119	-6.16257	1.20702	SV_81	SV_30	-0.970588	1.74223	-7.01308	-
120	-6.16257	1.20702	SV_81	SV_377	-0.927634	6.22662	-0.903415	-
121	-6.94591	0.423682	SV_76	SV_124	-1	-3.9087	-5.89782	-
122	-6.94591	0.423682	SV_76	SV_396	-1	-6.55841	-2.90423	-
123	-6.94591	0.423682	SV_76	SV_478	-0.942857	-5.13357	-4.92102	-
124	-6.11481	2.72545	SV_100	SV_234	-0.942857	-5.46425	-3.99839	-
125	-6.11481	2.72545	SV_100	SV_419	-1	-6.73171	-3.07753	-
126	-5.85592	-2.79296	SV_39	SV_12	0.942857	6.65751	4.08214	+
127	-5.85592	-2.79296	SV_39	SV_22	1	NA	NA	+
128	-5.85592	-2.79296	SV_39	SV_143	0.942857	7.52029	-0.687539	+
129	-5.85592	-2.79296	SV_39	SV_150	0.942857	6.10922	-2.73518	+
130	-5.85592	-2.79296	SV_39	SV_299	0.941124	0.47166	-7.68372	+
131	-5.85592	-2.79296	SV_39	SV_170	0.942857	NA	NA	+
132	-5.85592	-2.79296	SV_39	SV_188	0.927634	-6.7932	3.11711	+
133	-5.85592	-2.79296	SV_39	SV_30	0.927634	1.74223	-7.01308	+
134	-5.85592	-2.79296	SV_39	SV_390	0.942857	-4.86101	-6.11518	+
135	-5.85592	-2.79296	SV_39	SV_378	0.941124	-0.733766	-6.80793	+
136	-5.85592	-2.79296	SV_39	SV_444	0.942857	6.36766	-0.687539	+
137	6.16332	-1.28276	SV_294	SV_412	-0.942857	6.15869	1.22913	-
138	-6.94006	-0.456855	SV_34	SV_46	-0.942857	NA	NA	-
139	-6.94006	-0.456855	SV_34	SV_97	0.942857	-2.39951	-7.41242	+
140	-6.94006	-0.456855	SV_34	SV_305	0.985611	NA	NA	+
141	-6.94006	-0.456855	SV_34	SV_84	0.942857	-6.34004	-2.79296	+
142	-6.11481	4.29211	SV_99	SV_90	1	-4.52113	-4.62609	+
143	-6.11481	4.29211	SV_99	SV_137	0.942857	6.94398	-2.00141	+
144	-6.11481	4.29211	SV_99	SV_400	0.942857	6.22662	-1.53274	+
145	-6.11481	4.29211	SV_99	SV_93	0.985611	6.16332	-1.15339	+
146	-6.11481	4.29211	SV_99	SV_300	0.941124	-4.54693	5.38776	+
147	-6.11481	4.29211	SV_99	SV_156	0.927634	6.81504	-0.445426	+
148	4.52974	4.61888	SV_54	SV_231	0.954864	-6.88131	-3.53796	+
149	4.52974	4.61888	SV_54	SV_444	0.927634	6.36766	-0.687539	+
150	7.70334	-1.41037	SV_68	SV_188	0.927634	-6.7932	3.11711	+
151	7.70334	-1.41037	SV_68	SV_30	0.927634	1.74223	-7.01308	+
152	7.70334	-1.41037	SV_68	SV_66	0.927634	6.57115	-0.529155	+
153	0.0112282	-6.26666	SV_51	SV_88	1	6.10361	2.74491	+
154	0.0112282	-6.26666	SV_51	SV_355	0.927634	7.19832	-1.95897	+
155	0.0112282	-6.26666	SV_51	SV_398	0.927634	6.18461	-1.41037	+
156	0.0112282	-6.26666	SV_51	SV_214	0.927634	5.43083	-3.91018	+
157	2.41007	6.62526	SV_36	SV_424	0.942857	NA	NA	+
158	7.59976	-0.789633	SV_38	SV_432	-0.942857	6.28819	-0.789633	-
159	-6.7932	3.11711	SV_188	SV_30	1	1.74223	-7.01308	+
160	-6.7932	3.11711	SV_188	SV_333	0.927634	7.42511	-1.83624	+
161	-6.7932	3.11711	SV_188	SV_163	0.927634	6.36766	-1.74861	+
162	-6.7932	3.11711	SV_188	SV_377	0.927634	6.22662	-0.903415	+
163	-6.7932	3.11711	SV_188	SV_157	0.941176	-7.72339	-1.24019	+
164	-6.39201	0.653115	SV_50	SV_180	-0.985611	7.66133	-0.903415	-
165	-6.39201	0.653115	SV_50	SV_265	0.942857	6.94203	0.445801	+
166	-6.39201	0.653115	SV_50	SV_144	0.942857	6.81504	-1.99073	+
167	6.65751	4.08214	SV_12	SV_22	0.942857	NA	NA	+
168	6.65751	4.08214	SV_12	SV_150	1	6.10922	-2.73518	+
169	6.65751	4.08214	SV_12	SV_299	0.941124	0.47166	-7.68372	+
170	6.65751	4.08214	SV_12	SV_188	0.927634	-6.7932	3.11711	+
171	6.65751	4.08214	SV_12	SV_30	0.927634	1.74223	-7.01308	+
172	6.65751	4.08214	SV_12	SV_378	0.941124	-0.733766	-6.80793	+
173	6.88694	3.52824	SV_31	SV_109	0.985611	-7.49981	1.76092	+
174	6.88694	3.52824	SV_31	SV_68	0.942857	7.70334	-1.41037	+
175	6.88694	3.52824	SV_31	SV_333	0.942857	7.42511	-1.83624	+
176	6.88694	3.52824	SV_31	SV_163	0.942857	6.36766	-1.74861	+
177	6.88694	3.52824	SV_31	SV_157	0.927634	-7.72339	-1.24019	+
178	6.88694	3.52824	SV_31	SV_66	0.985611	6.57115	-0.529155	+
179	-2.39951	-7.41242	SV_97	SV_187	0.942857	3.85995	-5.78666	+
180	-2.39951	-7.41242	SV_97	SV_305	0.927634	NA	NA	+
181	-3.9087	-5.89782	SV_124	SV_396	1	-6.55841	-2.90423	+
182	-3.9087	-5.89782	SV_124	SV_478	0.942857	-5.13357	-4.92102	+
183	-4.52113	-6.19276	SV_266	SV_86	-0.942857	NA	NA	-
184	-6.73171	-3.99839	SV_200	SV_89	0.942857	7.3168	-1.907	+
185	-6.73171	-3.99839	SV_200	SV_252	0.942857	5.3799	3.22847	+
186	-6.84297	-3.29589	SV_332	SV_311	-0.927634	6.18461	-1.02578	-
187	-6.55841	-2.90423	SV_396	SV_478	0.942857	-5.13357	-4.92102	+
188	-5.43643	3.90045	SV_71	SV_12	0.942857	6.65751	4.08214	+
189	-5.43643	3.90045	SV_71	SV_143	0.942857	7.52029	-0.687539	+
190	-5.43643	3.90045	SV_71	SV_150	0.942857	6.10922	-2.73518	+
191	-5.43643	3.90045	SV_71	SV_54	0.927634	4.52974	4.61888	+
192	-5.43643	3.90045	SV_71	SV_444	0.942857	6.36766	-0.687539	+
193	9.59306659332093e-17	6.26667	SV_10	SV_68	0.941124	7.70334	-1.41037	+
194	9.59306659332093e-17	6.26667	SV_10	SV_309	0.954864	7.59976	-1.64652	+
195	5.31307	5.40222	SV_142	SV_89	0.942857	7.3168	-1.907	+
196	7.42511	-0.599916	SV_70	SV_23	0.942857	-5.85592	-4.28295	+
197	7.42511	-0.599916	SV_70	SV_428	-0.927634	6.46284	-0.599916	-
198	7.72463	-1.28276	SV_148	SV_49	0.985611	6.40338	2.80454	+
199	7.72463	-1.28276	SV_148	SV_182	0.985611	6.57115	-1.907	+
200	7.72463	-1.28276	SV_148	SV_377	0.942857	6.22662	-0.903415	+
201	7.72463	-1.28276	SV_148	SV_432	0.942857	6.28819	-0.789633	+
202	7.72463	-1.28276	SV_148	SV_157	0.927634	-7.72339	-1.24019	+
203	7.72463	-1.28276	SV_148	SV_428	0.927634	6.46284	-0.599916	+
204	7.07291	-1.99073	SV_357	SV_266	-0.942857	-4.52113	-6.19276	-
205	7.07291	-1.99073	SV_357	SV_86	1	NA	NA	+
206	7.07291	-1.99073	SV_357	SV_80	0.942857	5.3799	3.82801	+
207	6.46284	-1.83624	SV_176	SV_332	-0.927634	-6.84297	-3.29589	-
208	6.46284	-1.83624	SV_176	SV_311	0.942857	6.18461	-1.02578	+
209	6.46284	-1.83624	SV_176	SV_509	0.927634	-4.86101	-4.70367	+
210	6.22662	-0.903415	SV_377	SV_157	0.985611	-7.72339	-1.24019	+
211	6.22662	-0.903415	SV_377	SV_66	0.927634	6.57115	-0.529155	+
212	0.47166	-7.68372	SV_299	SV_170	0.941124	NA	NA	+
213	0.47166	-7.68372	SV_299	SV_378	1	-0.733766	-6.80793	+
214	6.7876	-3.91018	SV_215	SV_311	0.942857	6.18461	-1.02578	+
215	6.7876	-3.91018	SV_215	SV_509	0.927634	-4.86101	-4.70367	+
216	-6.15673	-1.24019	SV_169	SV_186	-0.941124	5.80384	4.25195	-
217	-6.7932	3.90045	SV_223	SV_404	0.941124	6.68963	-0.477186	+
218	-6.7932	3.90045	SV_223	SV_83	-0.924062	NA	NA	-
219	0	7.83333	SV_1	SV_119	-0.927634	0.783333	7.05	-
220	0.783333	7.05	SV_119	SV_24	-0.985611	7.07291	-0.445426	-
221	0.783333	7.05	SV_119	SV_26	-0.927634	-6.09798	-4.32129	-
222	0.783333	7.05	SV_119	SV_231	-0.924062	-6.88131	-3.53796	-
223	4.52974	6.18555	SV_28	SV_41	-0.942857	7.19832	-0.477186	-
224	4.52974	6.18555	SV_28	SV_59	-0.942857	-3.75744	-5.23512	-
225	6.40338	4.25195	SV_27	SV_58	0.942857	-5.46425	-3.07753	+
226	6.40338	4.25195	SV_27	SV_80	0.942857	5.3799	3.82801	+
227	7.72536	1.22913	SV_249	SV_169	1	-6.15673	-1.24019	+
228	7.72536	1.22913	SV_249	SV_186	-0.941124	5.80384	4.25195	-
229	7.66133	-0.903415	SV_180	SV_265	-0.927634	6.94203	0.445801	-
230	7.66133	-0.903415	SV_180	SV_144	-0.985611	6.81504	-1.99073	-
231	6.36766	-1.74861	SV_163	SV_377	0.942857	6.22662	-0.903415	+
232	6.36766	-1.74861	SV_163	SV_157	0.985611	-7.72339	-1.24019	+
233	6.36766	-1.74861	SV_163	SV_66	0.927634	6.57115	-0.529155	+
234	6.22662	-1.53274	SV_400	SV_93	0.985611	6.16332	-1.15339	+
235	6.22662	-1.53274	SV_400	SV_300	0.941124	-4.54693	5.38776	+
236	6.22662	-1.53274	SV_400	SV_156	0.927634	6.81504	-0.445426	+
237	6.10361	4.31157	SV_8	SV_19	0.942857	NA	NA	+
238	6.10361	4.31157	SV_8	SV_49	0.927634	6.40338	2.80454	+
239	6.10361	4.31157	SV_8	SV_79	0.942857	5.80384	2.80454	+
240	6.10361	4.31157	SV_8	SV_182	0.927634	6.57115	-1.907	+
241	6.40338	2.80454	SV_49	SV_333	0.927634	7.42511	-1.83624	+
242	6.40338	2.80454	SV_49	SV_182	1	6.57115	-1.907	+
243	6.40338	2.80454	SV_49	SV_163	0.927634	6.36766	-1.74861	+
244	6.40338	2.80454	SV_49	SV_377	0.927634	6.22662	-0.903415	+
245	6.40338	2.80454	SV_49	SV_157	0.941176	-7.72339	-1.24019	+
246	6.40338	2.80454	SV_49	SV_428	0.941176	6.46284	-0.599916	+
247	7.72463	-1.15339	SV_60	SV_137	0.942857	6.94398	-2.00141	+
248	3.099	-7.01308	SV_18	SV_31	0.942857	6.88694	3.52824	+
249	3.099	-7.01308	SV_18	SV_109	0.985611	-7.49981	1.76092	+
250	3.099	-7.01308	SV_18	SV_176	-0.942857	6.46284	-1.83624	-
251	3.099	-7.01308	SV_18	SV_377	0.942857	6.22662	-0.903415	+
252	3.099	-7.01308	SV_18	SV_157	0.927634	-7.72339	-1.24019	+
253	3.099	-7.01308	SV_18	SV_66	0.985611	6.57115	-0.529155	+
254	-4.52113	-4.62609	SV_90	SV_137	0.942857	6.94398	-2.00141	+
255	-4.52113	-4.62609	SV_90	SV_400	0.942857	6.22662	-1.53274	+
256	-4.52113	-4.62609	SV_90	SV_93	0.985611	6.16332	-1.15339	+
257	-4.52113	-4.62609	SV_90	SV_300	0.941124	-4.54693	5.38776	+
258	-4.52113	-4.62609	SV_90	SV_156	0.927634	6.81504	-0.445426	+
259	-7.49981	0.653115	SV_4	SV_18	-0.941124	3.099	-7.01308	-
260	-7.49981	0.653115	SV_4	SV_109	-0.924062	-7.49981	1.76092	-
261	-7.49981	0.653115	SV_4	SV_148	-0.941124	7.72463	-1.28276	-
262	-7.49981	0.653115	SV_4	SV_49	-0.924062	6.40338	2.80454	-
263	-7.49981	0.653115	SV_4	SV_250	0.924062	-6.84297	-3.78002	+
264	-7.49981	0.653115	SV_4	SV_182	-0.924062	6.57115	-1.907	-
265	-7.49981	0.653115	SV_4	SV_377	-0.941124	6.22662	-0.903415	-
266	-7.49981	0.653115	SV_4	SV_157	-0.924062	-7.72339	-1.24019	-
267	-7.49981	0.653115	SV_4	SV_428	-0.924062	6.46284	-0.599916	-
268	-7.49981	0.653115	SV_4	SV_66	-0.924062	6.57115	-0.529155	-
269	NA	NA	SV_7	SV_80	-0.942857	5.3799	3.82801	-
270	NA	NA	SV_32	SV_142	0.942857	5.31307	5.40222	+
271	NA	NA	SV_32	SV_200	0.942857	-6.73171	-3.99839	+
272	NA	NA	SV_25	SV_52	0.941124	7.3168	-0.529155	+
273	NA	NA	SV_25	SV_4	1	-7.49981	0.653115	+
274	NA	NA	SV_25	SV_18	-0.941124	3.099	-7.01308	-
275	NA	NA	SV_25	SV_109	-0.924062	-7.49981	1.76092	-
276	NA	NA	SV_25	SV_148	-0.941124	7.72463	-1.28276	-
277	NA	NA	SV_25	SV_49	-0.924062	6.40338	2.80454	-
278	NA	NA	SV_25	SV_250	0.924062	-6.84297	-3.78002	+
279	NA	NA	SV_25	SV_182	-0.924062	6.57115	-1.907	-
280	NA	NA	SV_25	SV_377	-0.941124	6.22662	-0.903415	-
281	NA	NA	SV_25	SV_157	-0.924062	-7.72339	-1.24019	-
282	NA	NA	SV_25	SV_428	-0.924062	6.46284	-0.599916	-
283	NA	NA	SV_25	SV_66	-0.924062	6.57115	-0.529155	-
284	NA	NA	SV_15	SV_19	0.942857	NA	NA	+
285	NA	NA	SV_15	SV_34	0.942857	-6.94006	-0.456855	+
286	NA	NA	SV_15	SV_79	0.942857	5.80384	2.80454	+
287	NA	NA	SV_15	SV_14	-0.927634	NA	NA	-
288	NA	NA	SV_15	SV_305	0.985611	NA	NA	+
289	NA	NA	SV_19	SV_70	-0.942857	7.42511	-0.599916	-
290	NA	NA	SV_19	SV_428	0.927634	6.46284	-0.599916	+
291	NA	NA	SV_22	SV_143	0.942857	7.52029	-0.687539	+
292	NA	NA	SV_22	SV_150	0.942857	6.10922	-2.73518	+
293	NA	NA	SV_22	SV_299	0.941124	0.47166	-7.68372	+
294	NA	NA	SV_22	SV_170	0.942857	NA	NA	+
295	NA	NA	SV_22	SV_188	0.927634	-6.7932	3.11711	+
296	NA	NA	SV_22	SV_30	0.927634	1.74223	-7.01308	+
297	NA	NA	SV_22	SV_390	0.942857	-4.86101	-6.11518	+
298	NA	NA	SV_22	SV_378	0.941124	-0.733766	-6.80793	+
299	NA	NA	SV_22	SV_444	0.942857	6.36766	-0.687539	+
300	NA	NA	SV_131	SV_84	0.942857	-6.34004	-2.79296	+
301	NA	NA	SV_46	SV_14	0.927634	NA	NA	+
302	NA	NA	SV_46	SV_187	-0.942857	3.85995	-5.78666	-
303	NA	NA	SV_46	SV_305	-0.927634	NA	NA	-
304	NA	NA	SV_170	SV_378	0.941124	-0.733766	-6.80793	+
305	NA	NA	SV_86	SV_80	0.942857	5.3799	3.82801	+
306	NA	NA	SV_14	SV_187	-0.927634	3.85995	-5.78666	-
307	NA	NA	SV_391	SV_163	0.941124	6.36766	-1.74861	+
308	NA	NA	SV_391	SV_377	0.941124	6.22662	-0.903415	+
309	NA	NA	SV_391	SV_157	0.954864	-7.72339	-1.24019	+
310	NA	NA	SV_391	SV_509	-0.924062	-4.86101	-4.70367	-
311	NA	NA	SV_424	SV_332	-0.927634	-6.84297	-3.29589	-
312	NA	NA	SV_424	SV_404	-0.942857	6.68963	-0.477186	-
313	NA	NA	SV_324	SV_269	-1	5.21673	-5.78666	-
314	NA	NA	SV_305	SV_84	0.927634	-6.34004	-2.79296	+
